# Supplementary material
Source: Research Square preprint supplement (doi:10.21203/rs.3.rs-9110018/v1)
Supplement: Supplementary file 1 [file 1a13a256b1fb6ab7003c4e9b.docx]

**Supplementary Information**

**Bias-free Solar Co-production of Hydrogen Peroxide and Chlorine from Seawater Using Single-Atom Electrocatalysts**

**June Sung Lim,1,2,9 Jaewon Cho,3,9 Seyeon Hwang,3,9 Geunsu Bae,5,9 Jinjong Kim,1 Siyeon Jeong,6 Jaehyun Nam,3 Hae Rim Sung,1 Min Seok Kang,3 Young Jin Sa,7
Bora Seo,2 Kyuwook Ihm,8 Han-Koo Lee,8 Hu Young Jeong,6 Tae Joo Shin,6
Chang Hyuck Choi,*,5 Tae Hoon Oh,*,3,4 Ji-Wook Jang,*,3 and Sang Hoon Joo*,1**

1Department of Chemistry, Seoul National University, Seoul 08826, Republic of Korea

2Center for Hydrogen and Fuel Cells, Korea Institute of Science and Technology (KIST), Seoul 02792, Republic of Korea

3School of Energy and Chemical Engineering, Ulsan National Institute of Science and Technology (UNIST), Ulsan 44919, Republic of Korea

4Graduate School of Carbon Neutrality, Ulsan National Institute of Science and Technology (UNIST), Ulsan 44919, Republic of Korea

5Department of Chemistry, Pohang University of Science and Technology (POSTECH), Pohang 37673, Republic of Korea

6Graduate School of Semiconductor Materials and Devices Engineering, Ulsan National Institute of Science and Technology (UNIST), Ulsan 44919, Republic of Korea

7Department of Chemistry, Kwangwoon University, Seoul 01897, Republic of Korea

8Pohang Accelerator Laboratory, Pohang, Gyeongbuk 37673, Republic of Korea

9These authors contributed equally: June Sung Lim, Jaewon Cho, Seyeon Hwang, Geunsu Bae

* Correspondence and requests for materials should be addressed to C.H.C. (chchoi@postech.ac.kr); T.H.O. (oh.taehoon@unist.ac.kr); J.-W.J. (jiwjang@unist.ac.kr); S.H.J. (shjoo1@snu.ac.kr)

**Table of Contents**

| **Supplementary Notes** | **S4** |
| --- | --- |
| **Note 1.** TEA methodology for the PV-SAEC system. | **S4** |
| **Note 2.** LCA methodology and carbon footprint analysis of the PV-SAEC system. | **S7** |
| **Supplementary Figures** | **S8** |
| **Fig. 1.** Schematic illustration for the preparation of *X*-Ni SACs. | **S8** |
| **Fig. 2.** XRD patterns of *X*-Ni SACs. | **S9** |
| **Fig. 3.** N2 adsorption analyses of *X*-Ni SACs. | **S10** |
| **Fig. 4.** HAADF-STEM and EDS mapping images of *X*-Ni SACs. | **S11** |
| **Fig. 5.** HAADF-STEM images of RT-, LT-, and IT-Ni SACs. | **S12** |
| **Fig. 6.** N 1a and Ni 2p XPS spectra of *X*-Ni SACs. | **S13** |
| **Fig. 7.** Structural model for EXAFS fitting of *X*-Ni SACs. | **S14** |
| **Fig. 8.** EXAFS fitting results in *R* space for *X*-Ni SACs. | **S15** |
| **Fig. 9**. C K-edge NEXAFS spectra of *X*-Ni SACs. | **S16** |
| **Fig. 10.** CV curves of *X*-Ni SACs recorded in Ar-saturated 0.1 M KOH. | **S17** |
| **Fig. 11.** Nyquist plots obtained from EIS measurements of *X*-Ni SACs. | **S18** |
| **Fig. 12.** HPR polarization curves of *X*-Ni SACs. | **S19** |
| **Fig. 13.** ORR LSV curves of *X*-Ni SACs recorded in 0.1 M KOH in the absence and presence of SCN−. | **S20** |
| **Fig. 14.** ORR LSV curves of *X*-Ni SACs recorded in 0.1 M KOH in the absence and presence of CN−. | **S21** |
| **Fig. 15.** TOFs for H­2O2 production of *X*-Ni SACs normalized to Ni single-atom sites. | **S22** |
| **Fig. 16.** Detailed schematic illustration for the PV-SAEC system. | **S23** |
| **Fig. 17.** XRD pattern and HAADF-STEM image of Pt SAC. | **S24** |
| **Fig. 18.** CER activity and selectivity of Pt SAC. | **S25** |
| **Fig. 19.** ORR activity of HT-Ni SAC/GDL and CER activity of Pt SAC/CP | **S26** |
| **Fig. 20.** Power–potential curve of a silicon solar cell module. | **S27** |
| **Fig. 21.** pH changes of the NaCl solution in the desalination compartment after cell operation. | **S28** |
| **Fig. 22.** Polarization curves of two-electrode SAEC (HT-Ni SAC/GDL || Pt SAC/hydrophobic CP). | **S29** |
| **Fig. 23.** CA response of the PV-SAEC system and FEs for H2O2 and Cl2 over three consecutive 1-h cycles and pH of the NaCl solution in desalination compartment before and after three cycles. | **S30** |
| **Fig. 24.** TEA–LCA system boundaries of the H2O2 and PO scenarios. | **S31** |
| **Fig. 25.** XRD, N2 adsorption, and TEM analyses of SBA-15 silica template. | **S32** |
| **Fig. 26.** EXAFS fitting results in *R* space for Ni foil. | **S33** |
| **Fig. 27.** Collection efficiency of *X*-Ni SACs measured in 0.1 M KOH. | **S34** |
| **Fig. 28.** Sensitivity of the levelized H2O2 production cost and profitability. | **S35** |
| **Fig. 29.** SHAP analysis of the unit H­2O2 production cost. | **S36** |
| **Fig. 30.** Breakdown of the life-cycle GWP of H­2O2 production of the PV-SAEC system. | **S37** |
| **Fig. 31.** Breakdown of the life-cycle GWP of Cl2 production of the PV-SAEC system. | **S38** |
|  |  |
| **Supplementary Tables** | **S39** |
| **Table 1.** Textural properties of *X*-Ni SACs | **S39** |
| **Table 2.** Elemental analysis results of *X*-Ni SACs. | **S40** |
| **Table 3.** Summary of EXAFS fitting parameters for *X*-Ni SACs and Ni foil. | **S41** |
| **Table 4.** Benchmark of the electrochemical H2O2 performance of *X*-Ni SACs compared with reported SACs and carbon-based catalysts. | **S42** |
| **Table 5.** Market prices of key feedstocks and products assumed for cost estimations. | **S43** |
| **Table 6.** Parameters used to determine the required number of PV-SAEC modules. | **S44** |
| **Table 7.** Summary of CAPEX and OPEX parameters for the integrated electrochemical H2O2 production system. | **S45** |
| **Table 8.** Comparison of environmental impact indicator results between the PV-SAEC and the anthraquinone process. | **S46** |
| **Table 9**. Comparison of environmental impact indicator results between the PV-SAEC and the chlor–alkali process. | **S47** |
|  |  |
| **Supplementary References** | **S48** |
|  |  |

**Supplementary Notes**

**Supplementary Note 1 | TEA methodology for the PV-SAEC system**

A TEA of the PV-SAEC system is conducted to assess its economic viability. Two scenarios are used to estimate the unit H2O2 production cost with co-produced Cl2 (**Supplementary Fig. 23**) form the basis of the TEA. In the H2O2 scenario, this stored solution is sold directly as aqueous H2O2 together with the co-produced Cl2. In the alternative propylene oxide (PO) scenario, the H2O2 stream from the tank is routed to a downstream epoxidation unit and contacted with propylene to generate PO1. Although the alkaline H2O2 could in principle be purified and marketed directly, recent studies have shown in-situ upgrading H2O2, thereby eliminating the need for a dedicated purification step, represents an attractive option (**Supplementary Fig. 28**)1–3.

Shapley Additive exPlanations (SHAP) analysis is applied to systematically quantify how uncertainty in individual techno-economic parameter influences the unit H2O2 production cost (**Supplementary Fig. 29**). SHAP is a game-theoretic interpretability method that assigns each input feature a contribution to a model prediction, enabling a rigorous ranking of parameter importance. The analysis identifies the electrochemical cell (EC) membrane-electrode assembly (MEA) lifetime as the most influential factor, followed by the stream factor, EC electrode area, NASICON membrane price, and FE. Negative SHAP values correspond to cost reductions, indicating that extending MEA lifetime, decreasing the required electrode area, increasing FE though continued catalyst optimization, and locating the plant in regions with high solar irradiance offer substantial opportunities to further enhance the economic competitiveness of the PV-SAEC system.

The detailed calculation procedure is as follows. Based on the experimentally measured current density of 10 mA cm−2, the total charge passing through the system per hour, (C h−1 cm−2), is calculated from equation (1):

|  |  | (1) |
| --- | --- | --- |

The corresponding H2O2 production rate per electrode area, (mol h−1 cm−2), is then calculated for each FE using Faraday’s law (equation (2)):

|  |  | (2) |
| --- | --- | --- |

Where *z* is the number of electrons transferred per mole of product, and *F* is the Faraday constant. Combining with the target H2O2 production capacity (kg d−1) yields the required total electrode area via equations (3) and (4). Division by the area of a single module gives the number of modules required at each FE. The stream factor (SF), defined as the ratio of the actual annual operating hours to the total hours in a year, is used to calculate the effective annual production rate. All parameter values used in this analysis, including SF, are summarized in **Supplementary Table 6**.

|  |  | (3) |
| --- | --- | --- |
|  |  | (4) |

The total capital expenditure (CAPEX) of the integrated system is defined as the sum of the photovoltaic (PV) system, the electrolyzer stack, the chlorine liquefaction plant, the balance of plant (BoP), and installation, as given in equation (5):

|  |  | (5) |
| --- | --- | --- |

For each equipment item, the specific equipment cost is first calculated using the base-cost scaling relationship (equation (6)):

|  |  | (6) |
| --- | --- | --- |

where is required area (or capacity), is the reference area (or capacity), and is the scaling factor. In the PO scenario, the cost of the TS-1(33)-m catalyst used for propylene epoxidation is estimated from the loading of the active components and their market prices, resulting in 5.79 USD m−2; a catalyst lifetime of 7 years, a scaling factor of 0.8, and a conversion rate of 90% are assumed1. Owing to the limited availability of commercial price data for NASICON membranes, the cost of generic ceramic membranes is applied as a proxy, with the associated uncertainty evaluated using SHAP analysis4,5. The individual CAPEX components are converted to annual capital costs using the capital recovery factor (CRF) in equation (7):

|  |  | (7) |
| --- | --- | --- |

where is the discount rate and is equipment lifetime. The operating expenditure (OPEX) was taken as the sum of the annul operation and maintenance (O&M) cost, chlorine treatment cost, and input chemical costs expressed in equation (8):

|  |  | (8) |
| --- | --- | --- |

Finally, the unit H2O2 production cost is calculated using equation (9), which combines the annualized CAPEX, the OPEX, and annual revenue from co-produced Cl2 with the H2O2 production capacity:

|  |  | (9) |
| --- | --- | --- |

where and denote the capital cost and recovery factor of component , respectively. The number of was assumed to be 360 d y−1.

The specific energy consumption of the system is evaluated in three components. First the electrical energy required for the electrochemical reaction is calculated from the experimentally measured FE, cell voltage, and the reaction stoichiometry from equation 10:

|  |  | (10) |
| --- | --- | --- |

where is the molecular weight of H2O2 or Cl2 and is the cell voltage. The energy required for chlorine liquefaction is estimated using an average specific separation energy of 45 kWh per tonCl2, while H2O2 separation is evaluated assuming vacuum distillation6,7. In addition, the integrated system provides a desalination co-benefit that reduces the demand for external seawater reverse osmosis (SWRO), leading to further energy and cost saving. Based on the experimentally observed desalination performance (21% removal Na+ and 7% removal Cl−), the reduced SWRO demand is estimated using the specific energy consumption of 3.1 kWh m−3 (ref. 8). For the plant producing 100,000 kg H2O2 d−1, the integrated process is expected to save approximately 1.392,518 kWh of electricityy−1, corresponding to an annual cost saving of 139,252 USD.

**Supplementary Note 2 | LCA methodology and carbon footprint analysis of the PV-SAEC system**

A preliminary LCA is conducted to quantify the environmental impacts of the PV-SAEC system and to identify the main contributors to its overall carbon footprint. The functional unit is defined as 1 kg of H2O2 or Cl2 produced at the cell level, and the system boundary is set identical to that of the H2O2 scenario shown in **Supplementary Fig. 24**. The LCA is conducted using SimaPro (v10.2.0.1) with the Ecoinvent 3 database, and impact assessment is carried out using the CML method.

The key assumptions are summarized as follows:

1. Materials of construction for all equipment are excluded from the system boundary.
2. Input and output chemicals and energy flows are calculated from the experimentally measured FE and cell voltage, assuming full conversion with 75 % oxygen recovery.
3. Co-produced Cl2 is assumed to substitute Cl2 from a conventional chlor–alkali process, and the associated environmental burdens were allocated by substitution.
4. O2 supply is represented by liquefied O2 to reflect the used of high-purity O2.
5. Life cycle inventory data are primarily taken from global, rest-of-world (RoW), and U.S. datasets in Ecoinvent 3, depending on data availability and relevance.

The LCA results indicate that the PV-SAEC system achieves a net-negative global warming potential (GWP) of −0.1725 kg CO2-eq per kg H2O2, representing a substantial improvement over the reference anthraquinone process (2.16 kg CO2-eq per kg H2O2). The GWP breakdown (**Supplementary Fig. 30**) reveals that liquefied O2 is the dominant positive contributor (1.31 kg CO2-eq), followed by NaCl and photovoltaic electricity. Although the electricity required to drive the electrochemical reactions is significant, its contribution to GWP remains limited (0.2640 kg CO2-eq) because it is supplied by low-carbon PV power. In contrast, the substantial amount of co-produced Cl2 provides a large substitution credit (−2.21 kg CO2-eq), which is fully offset the system’s positive emissions. Consequently, the PV-SAEC system not only minimizes its own emissions but operates as a carbon sink, resulting in a net reduction in overall greenhouse gas impact. A similar trend is observed in the results for Cl2 production. The PV-SAEC system yields a net-negative GWP of −0.061 kg CO2-eq per kg Cl2, representing significant improvement over the conventional chlor–alkali process. Consistent with the H2O2 analysis, the GWP breakdown (**Supplementary Fig. 31**) identifies liquefied O2 as the dominant positive contributor (0.63 kg CO2-eq), confirming that the system maintains its carbon-negative performance despite this input burden.

**Supplementary Figures**


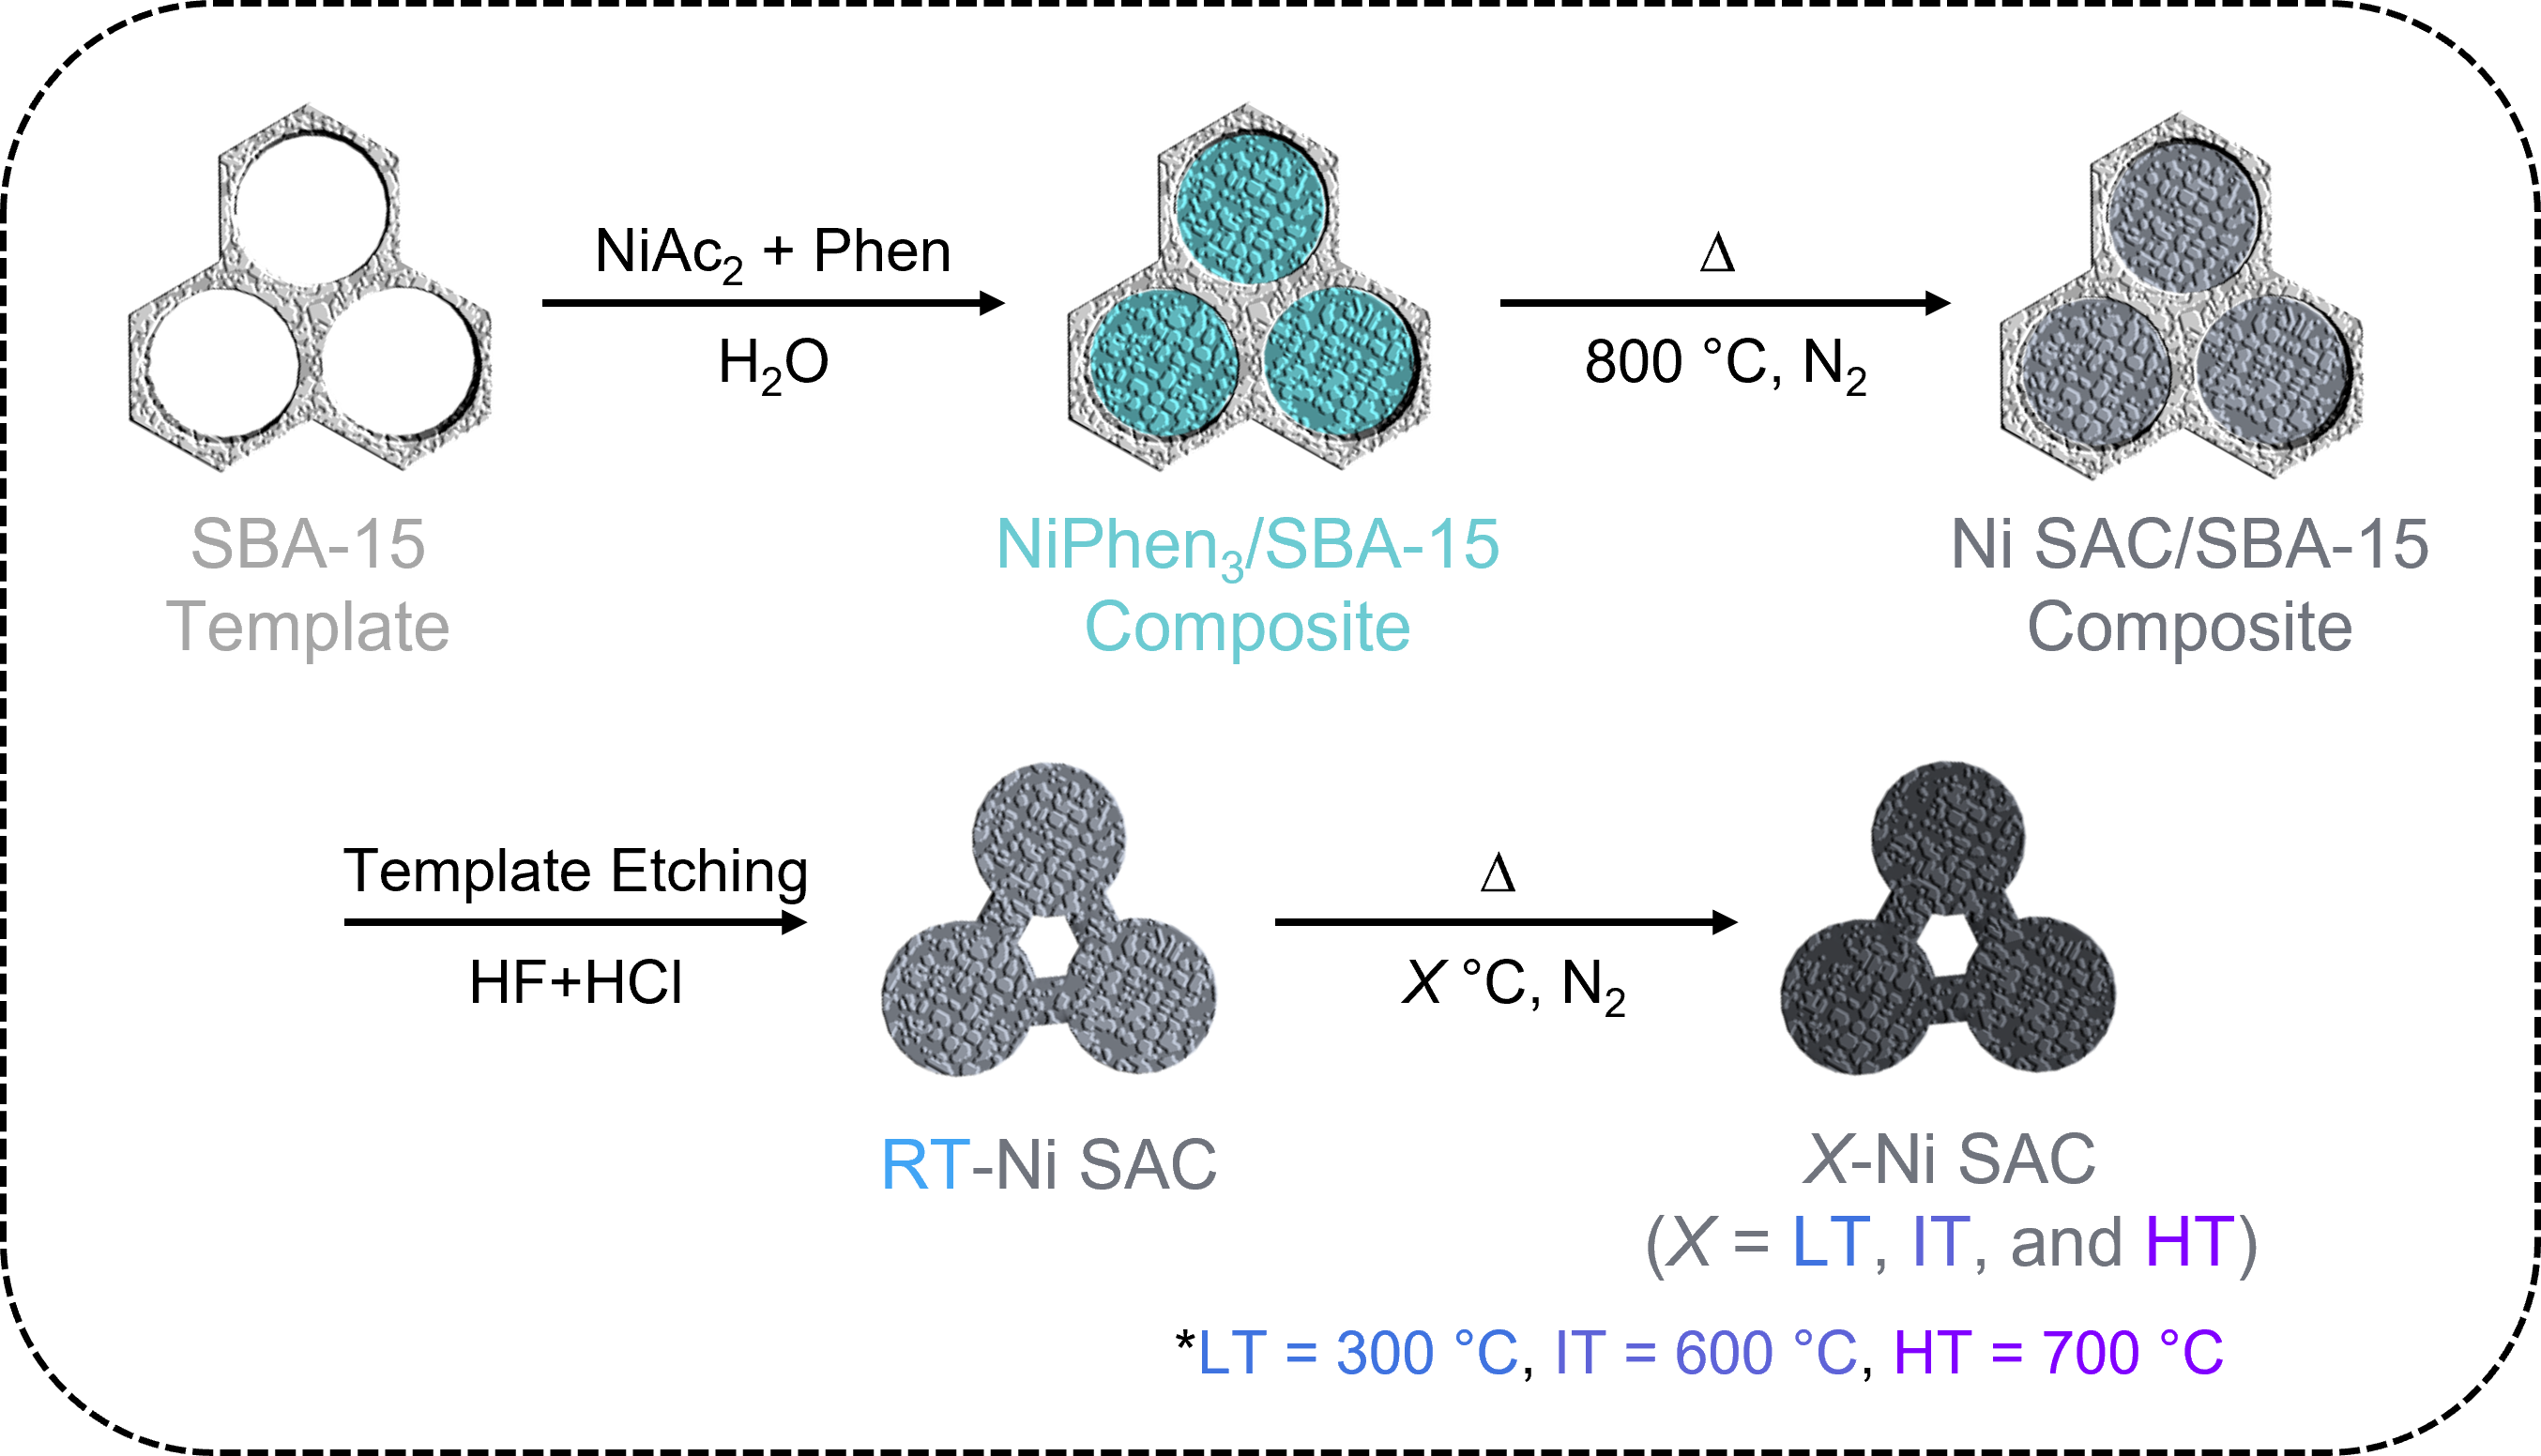


**Supplementary Fig. 1** | Schematic illustration for the preparation of *X*-Ni SACs.


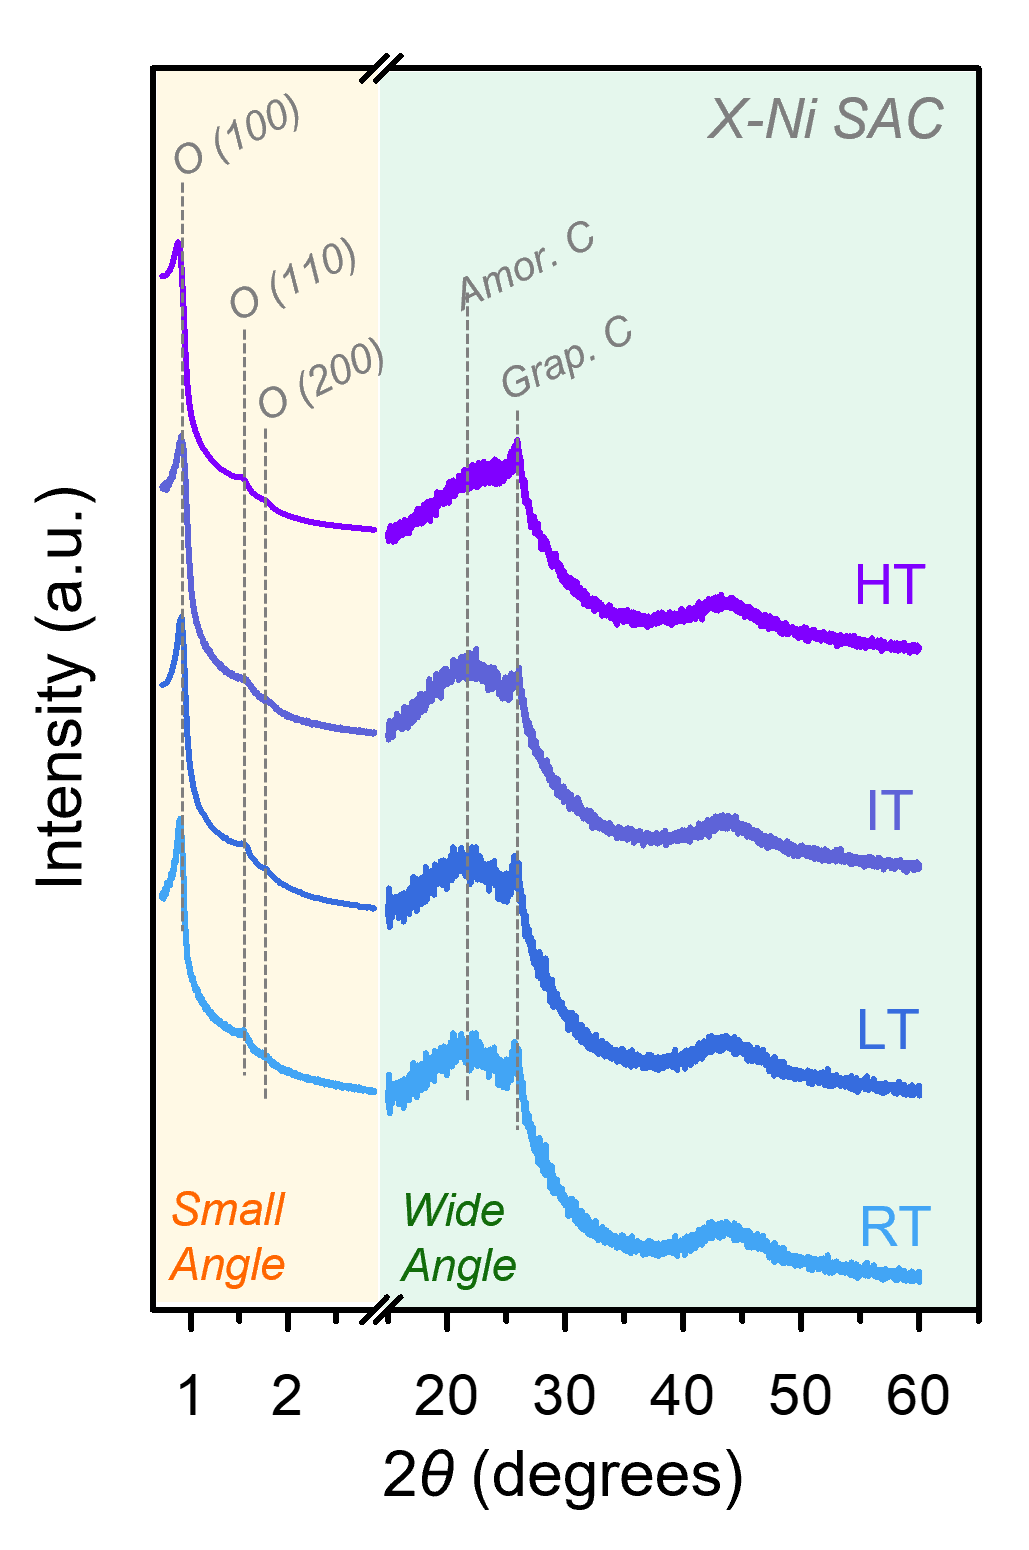


**Supplementary Fig. 2** | Small-angle and wide-angle XRD patterns of *X*-Ni SACs.


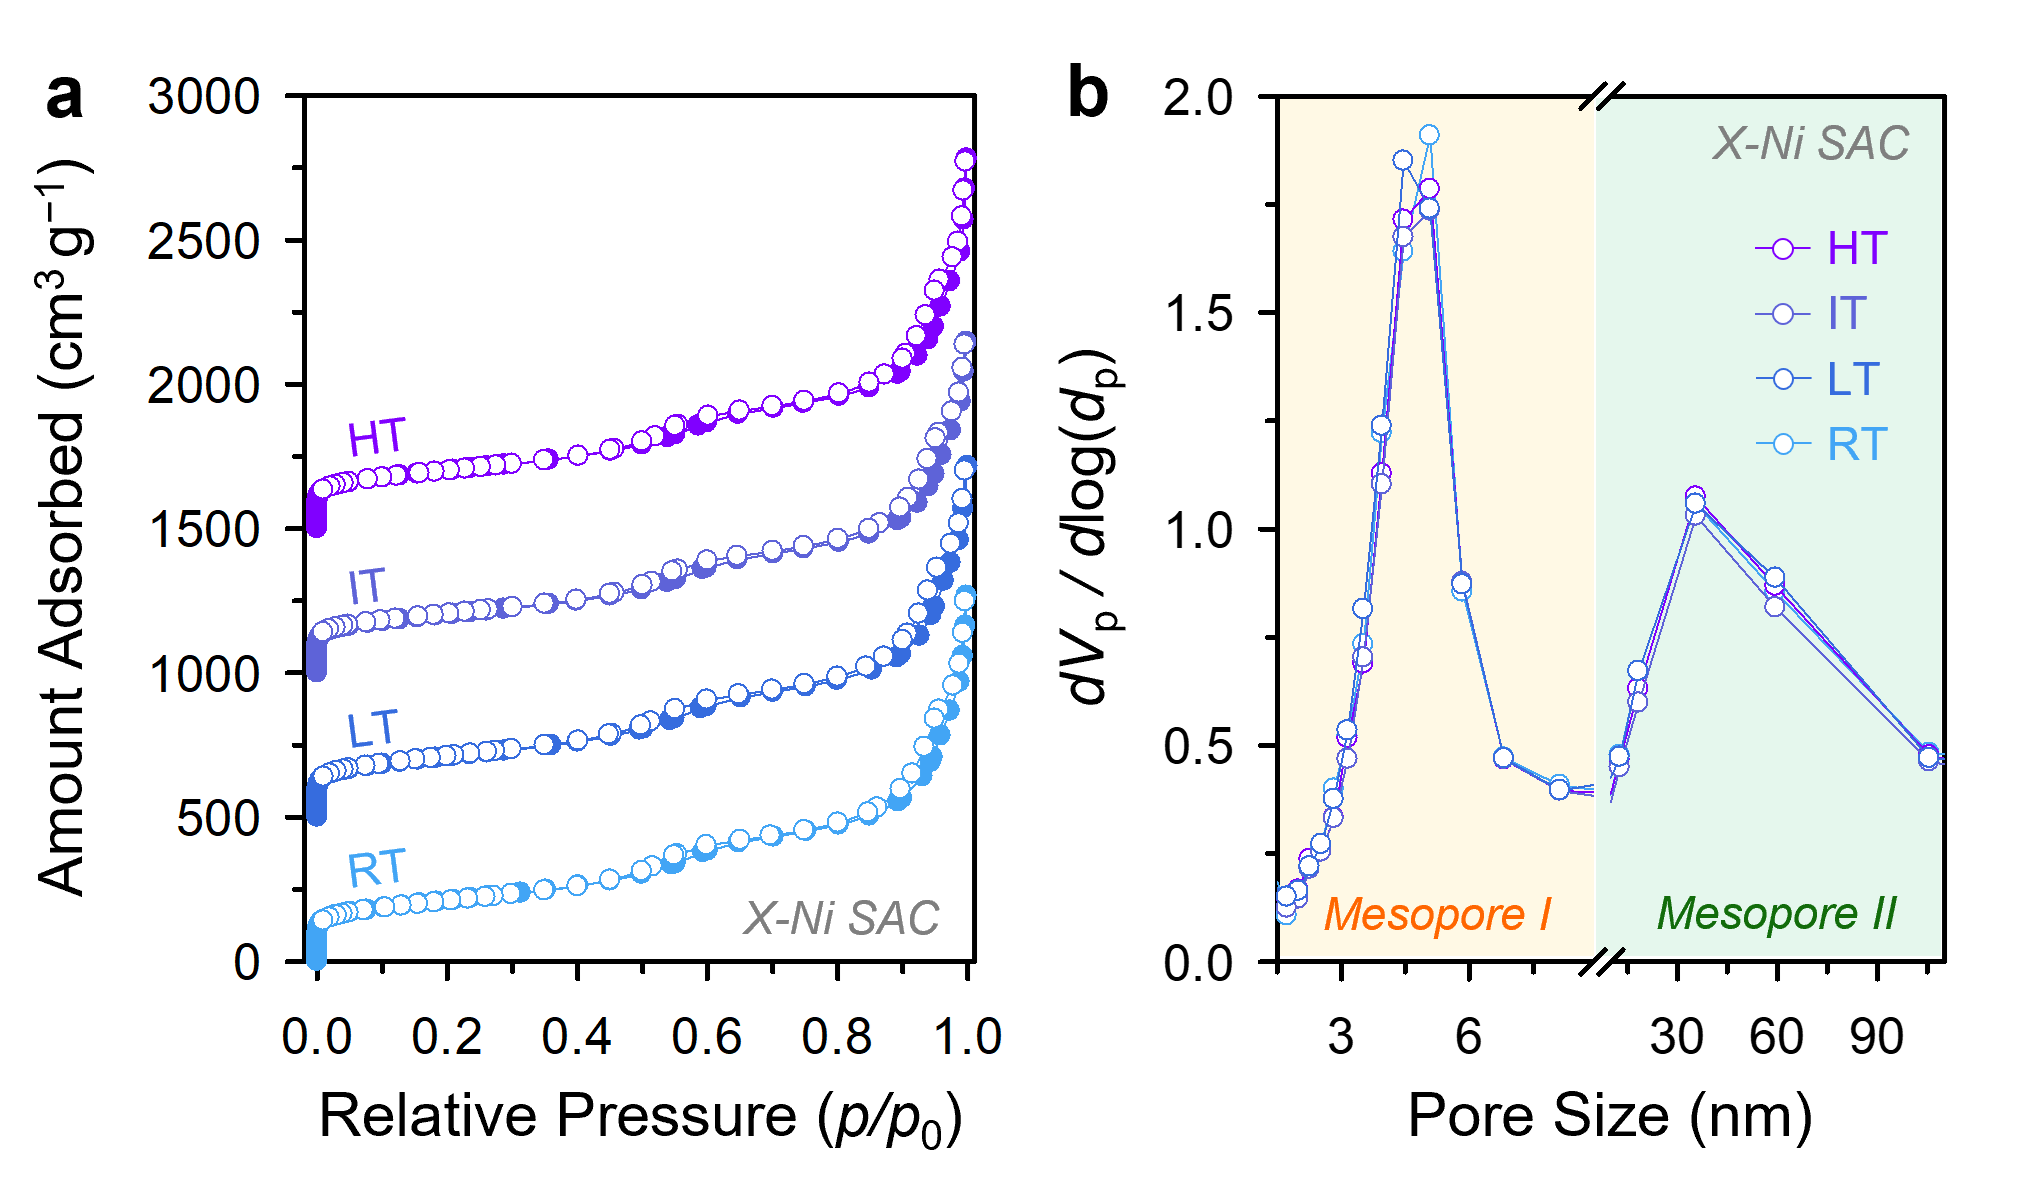


**Supplementary Fig. 3** | **a,b,** N2 adsorption–desorption isotherms (**a**) and BJH pore size distribution curves derived from the adsorption branch (**b**) of *X*-Ni SACs. The isotherms of LT-, IT-, and HT-Ni SACs were vertically offset by 500, 1000, and 1200 cm3 g−1, respectively, for clarity.


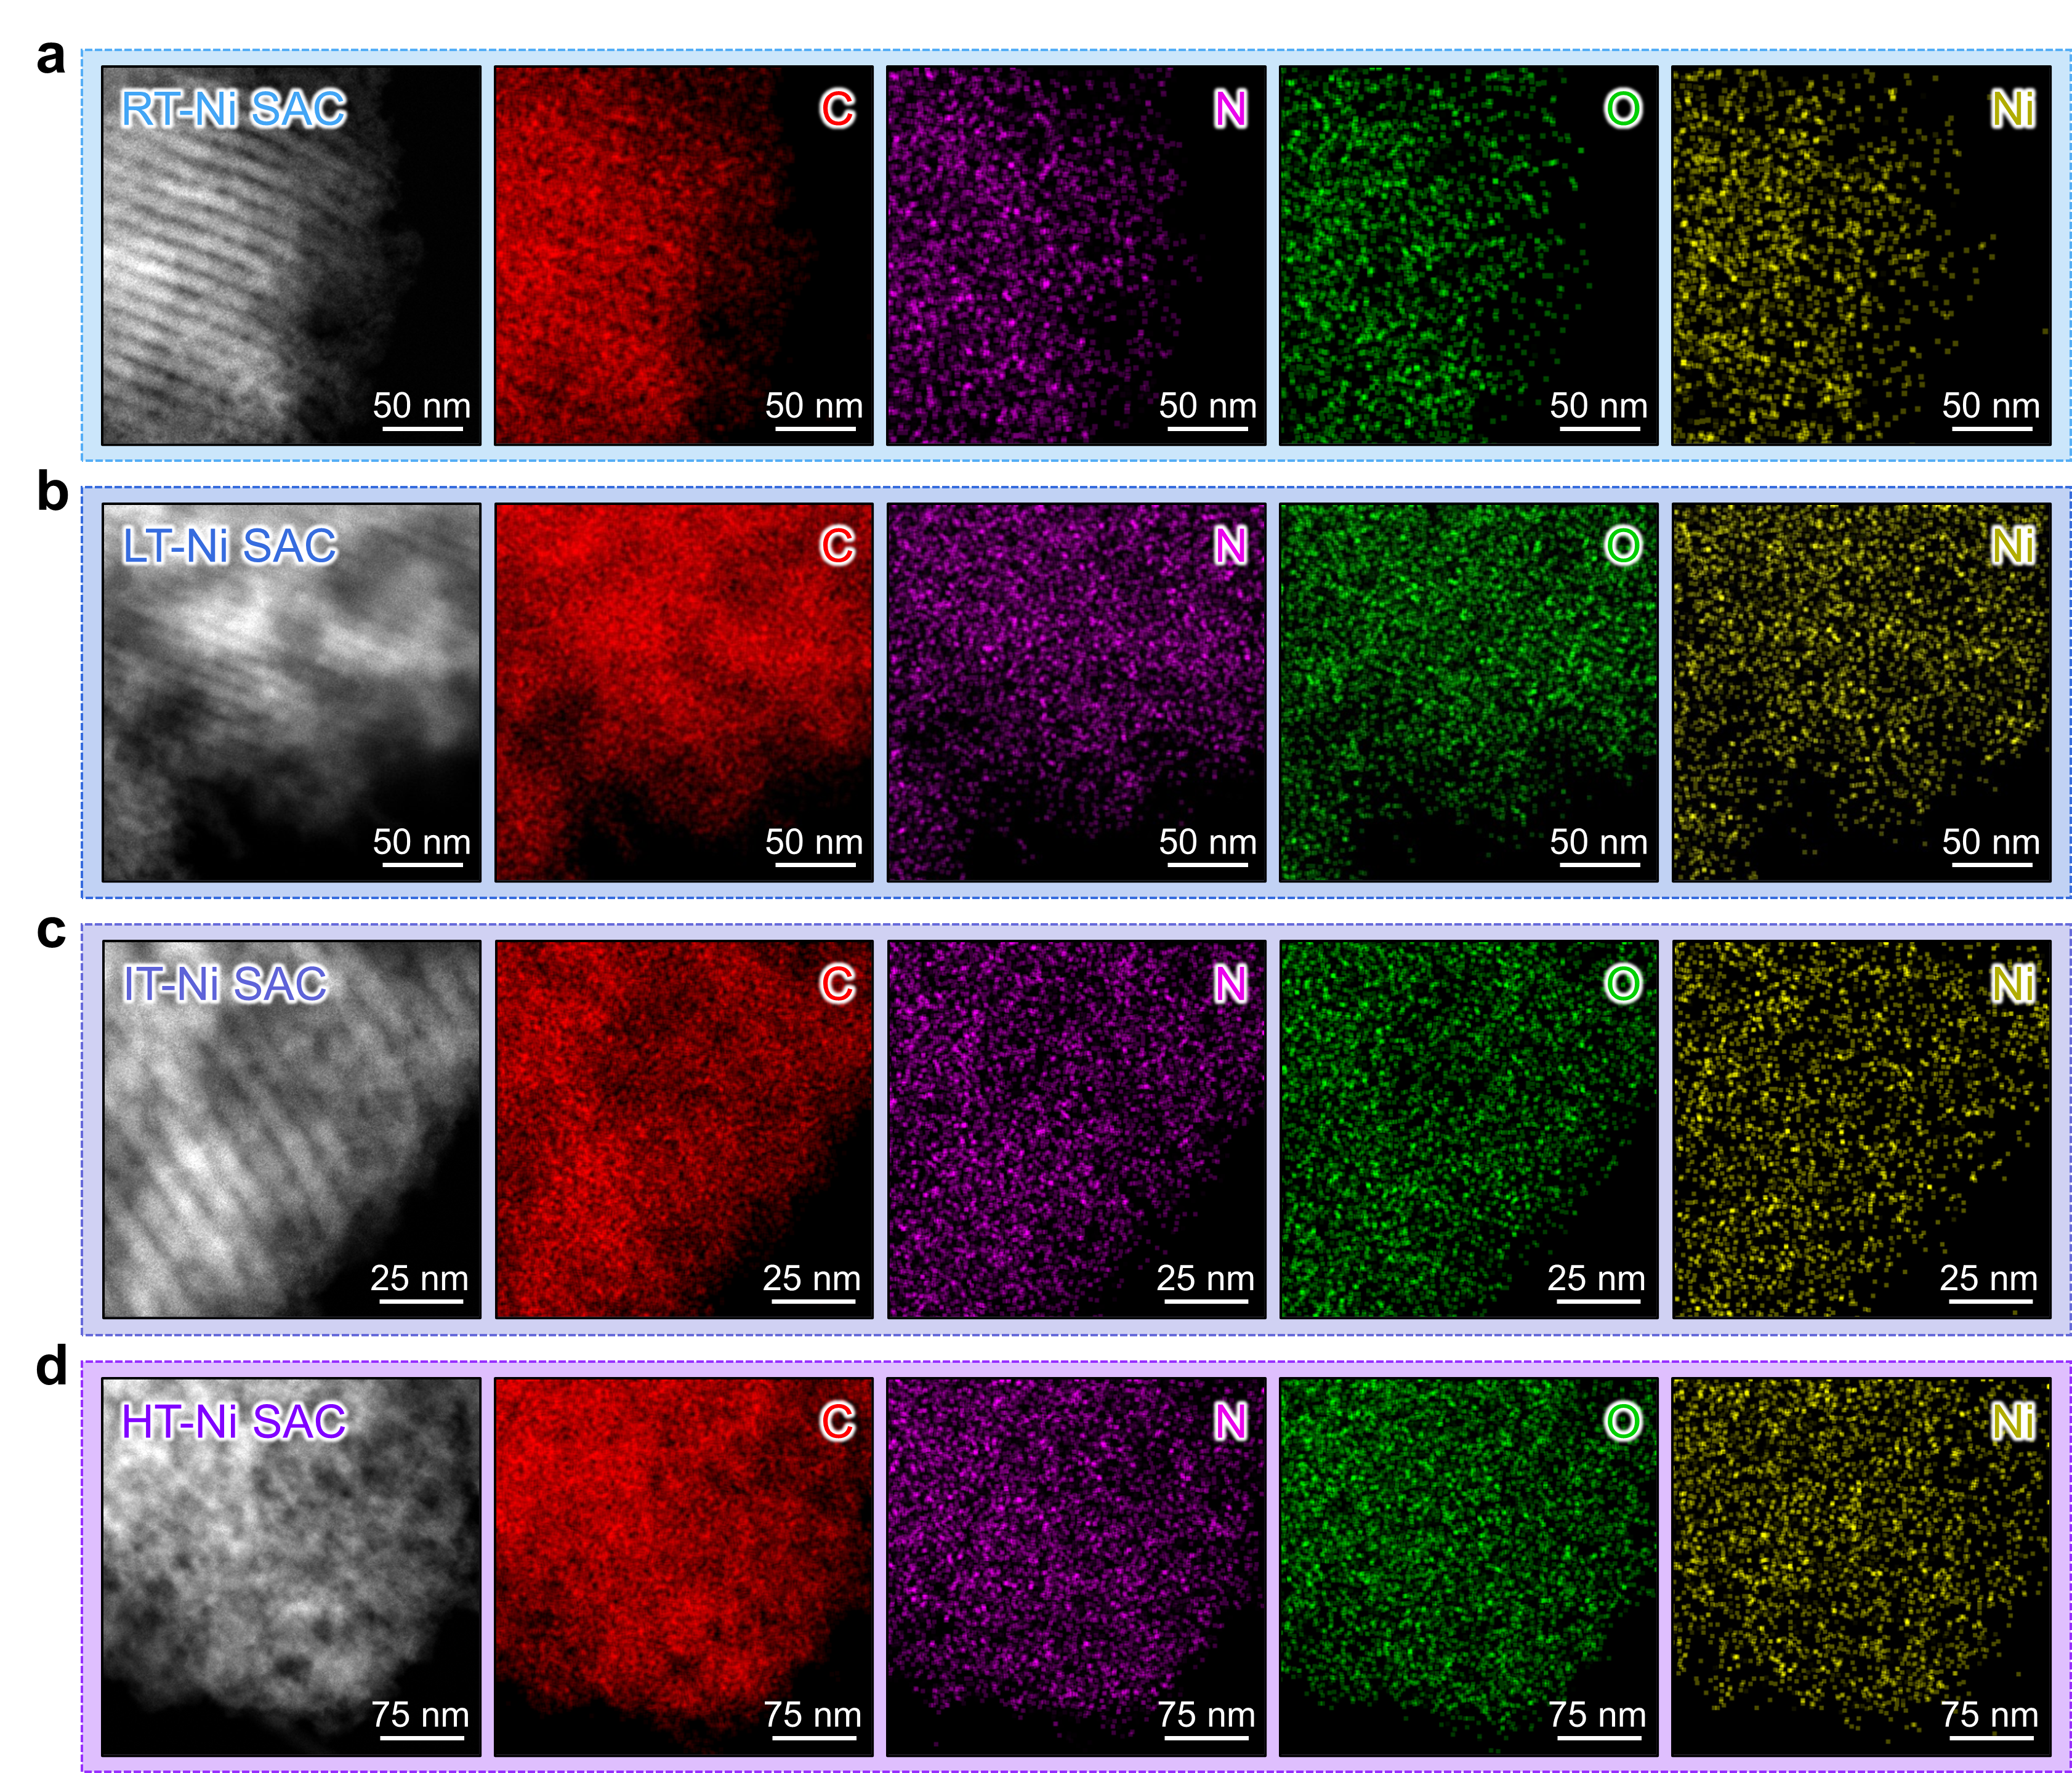


**Supplementary Fig. 4** | **a–d,** HAADF-STEM images and associated elemental EDS mapping images of RT-Ni SAC (**a**), LT-Ni SAC (**b**), IT-Ni SAC (**c**), and HT-Ni SAC (**d**). **Red**, carbon (C); **purple**, nitrogen (N); **green**, oxygen (O); **yellow**, nickel (Ni).


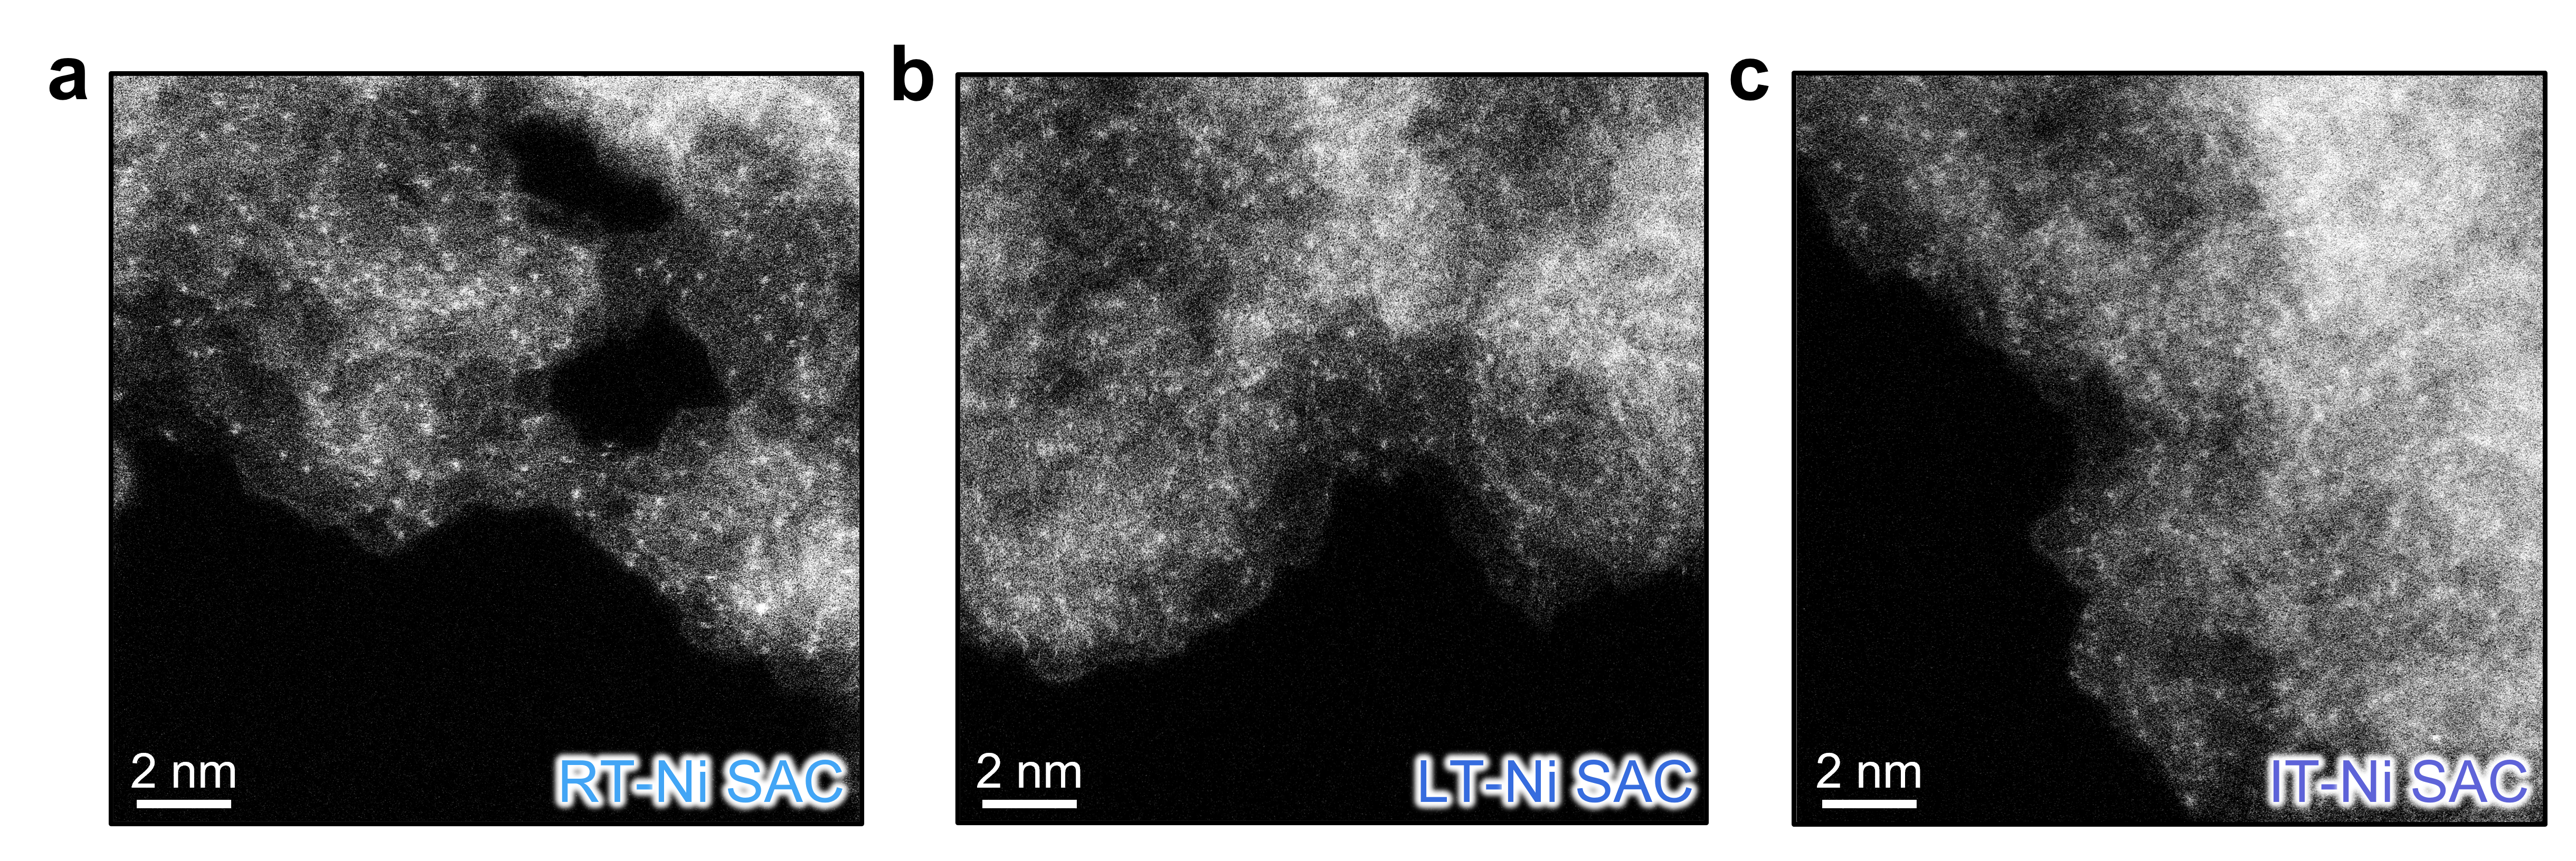


**Supplementary Fig. 5** | **a–c,** HAADF-STEM images of RT-Ni SAC (**a**), LT-Ni SAC (**b**), and IT-Ni SAC (**c**).


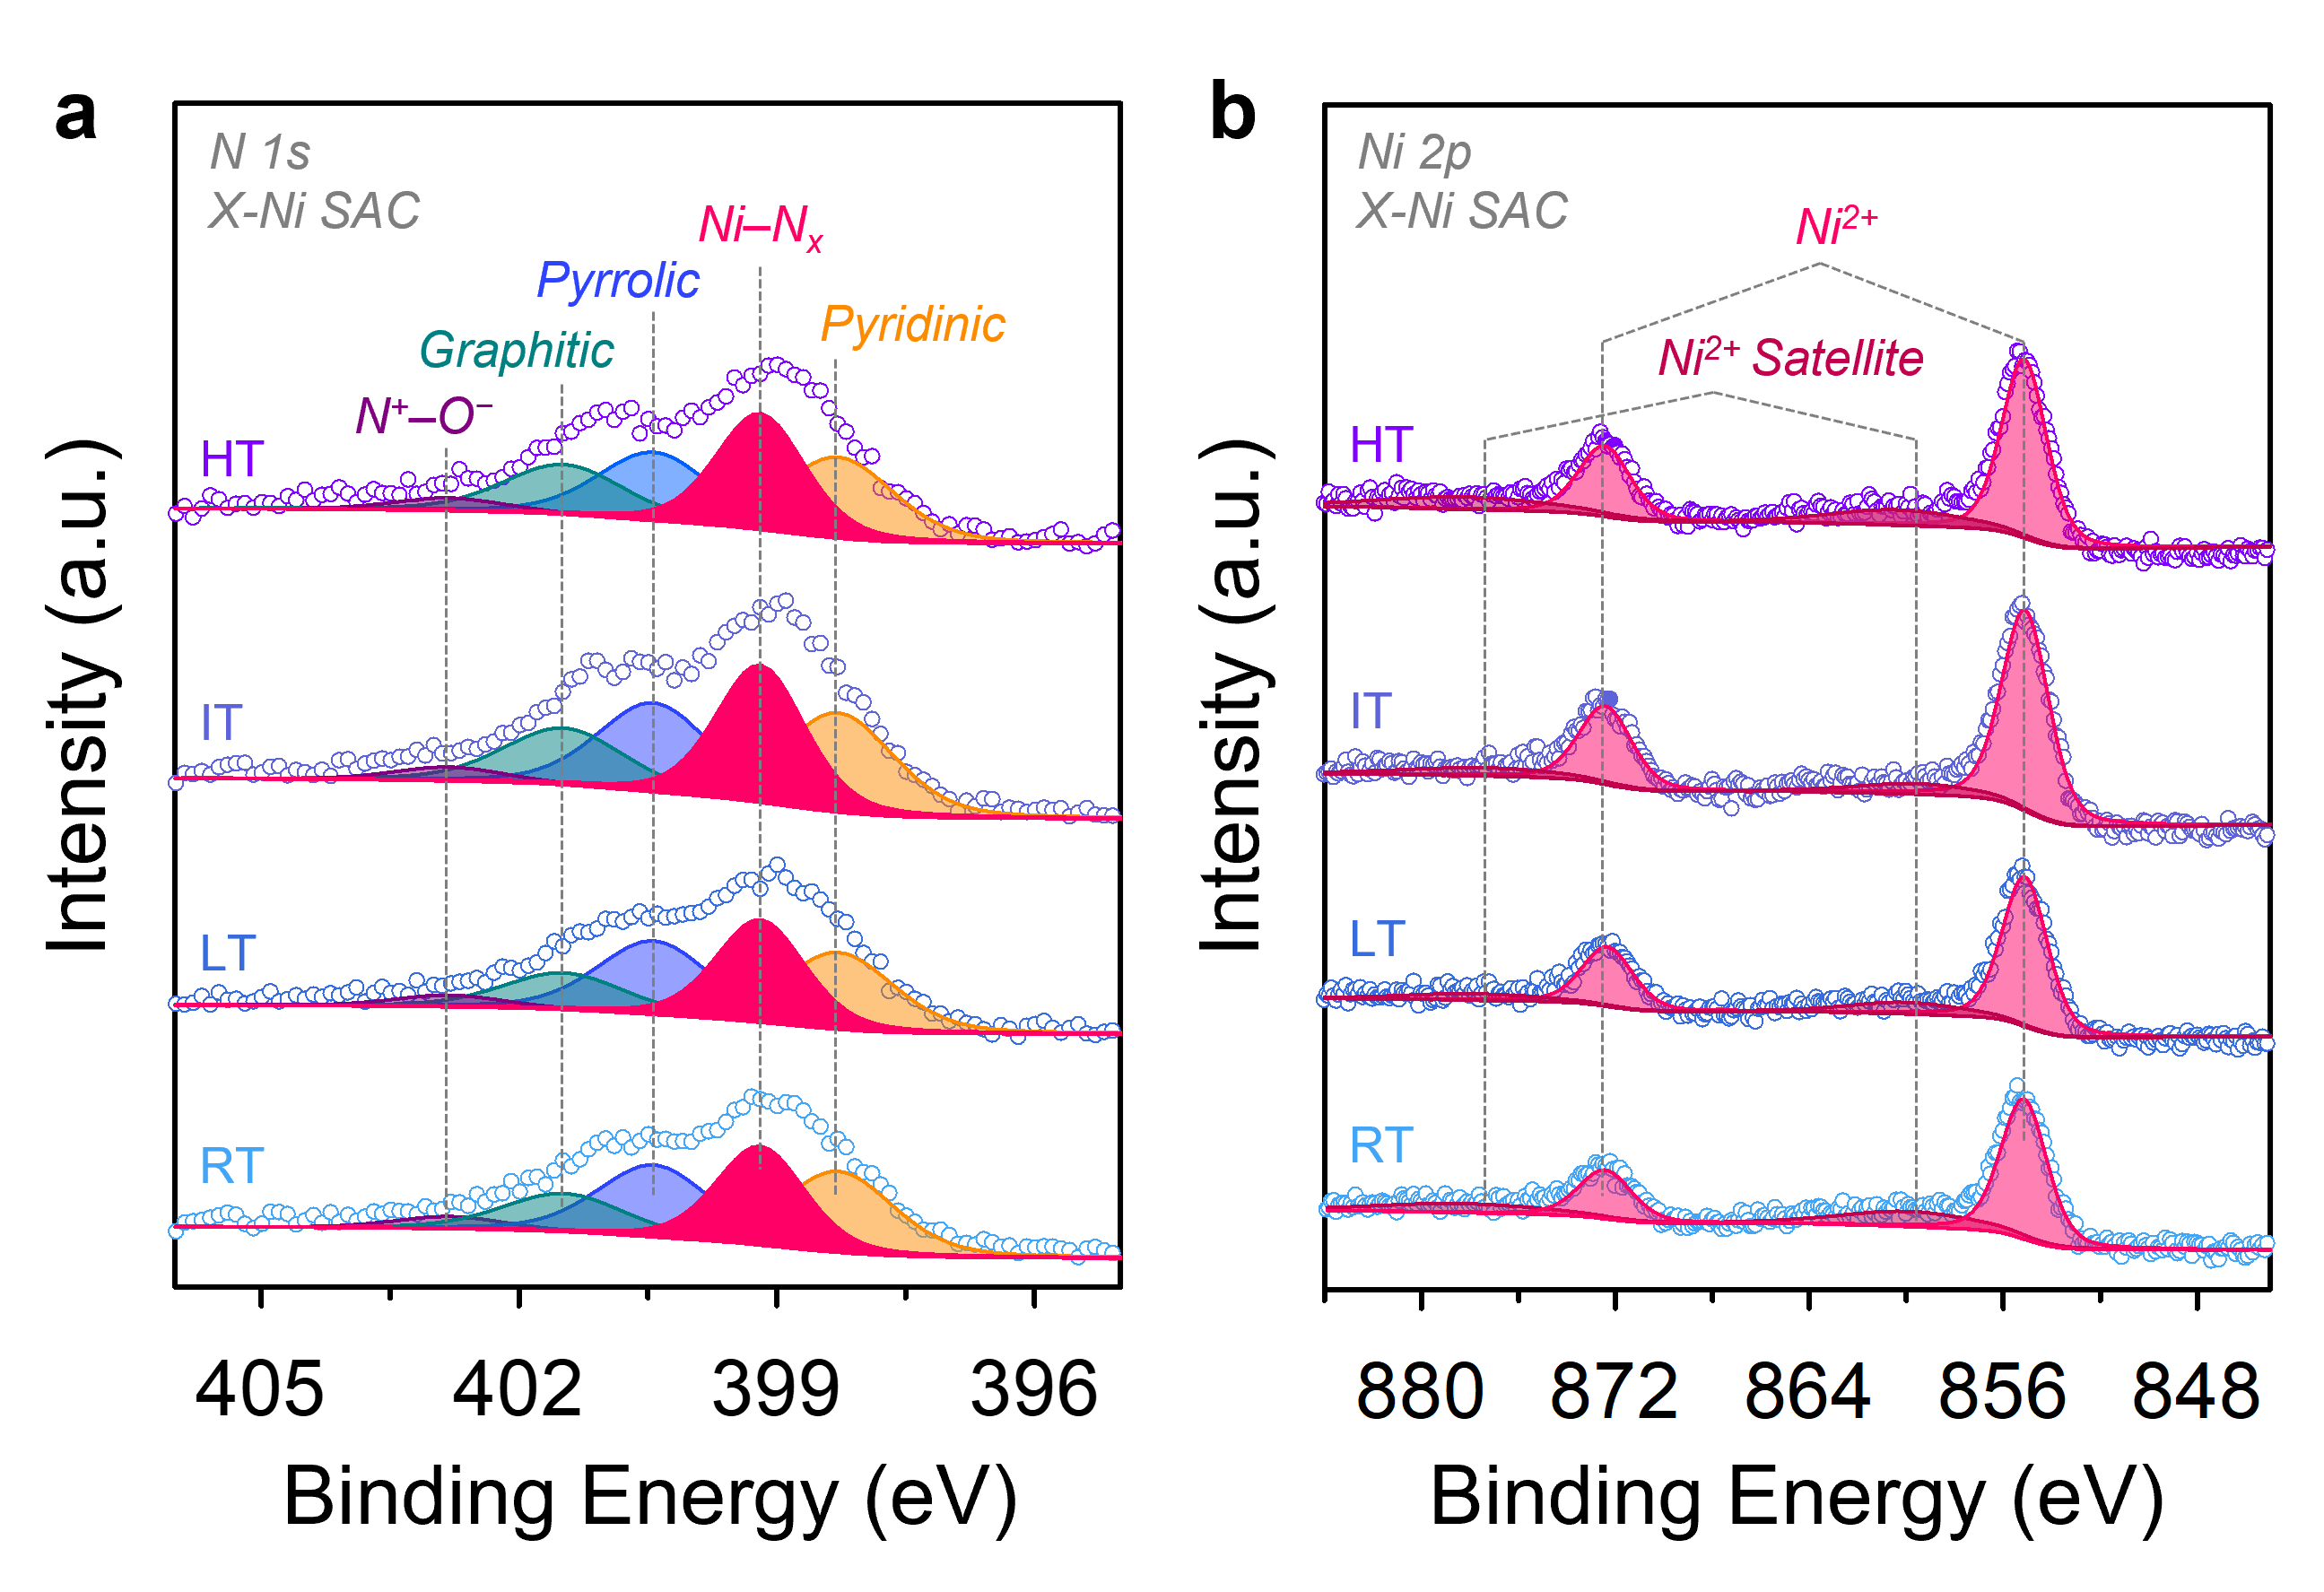


**Supplementary Fig. 6** | **a,b,** N 1s (**a**) and Ni 2p (**b**) XPS spectra of *X*-Ni SACs.


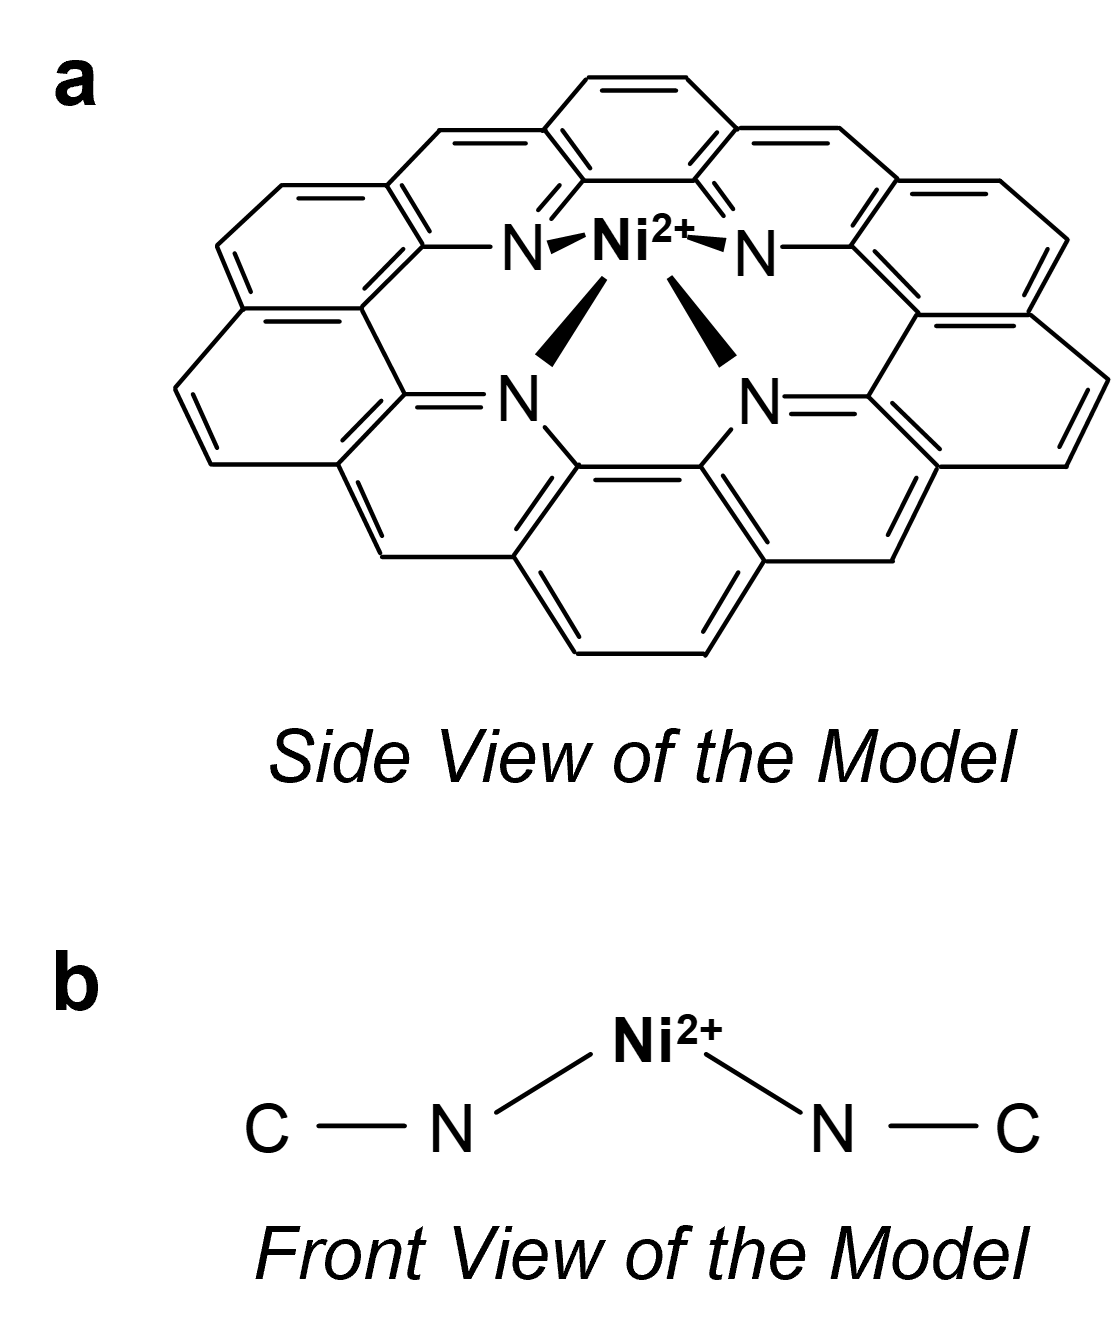


**Supplementary Fig. 7** | **a,b,** Side (**a**) and front (**b**) views of the structural model for EXAFS fitting of *X*-Ni SACs.


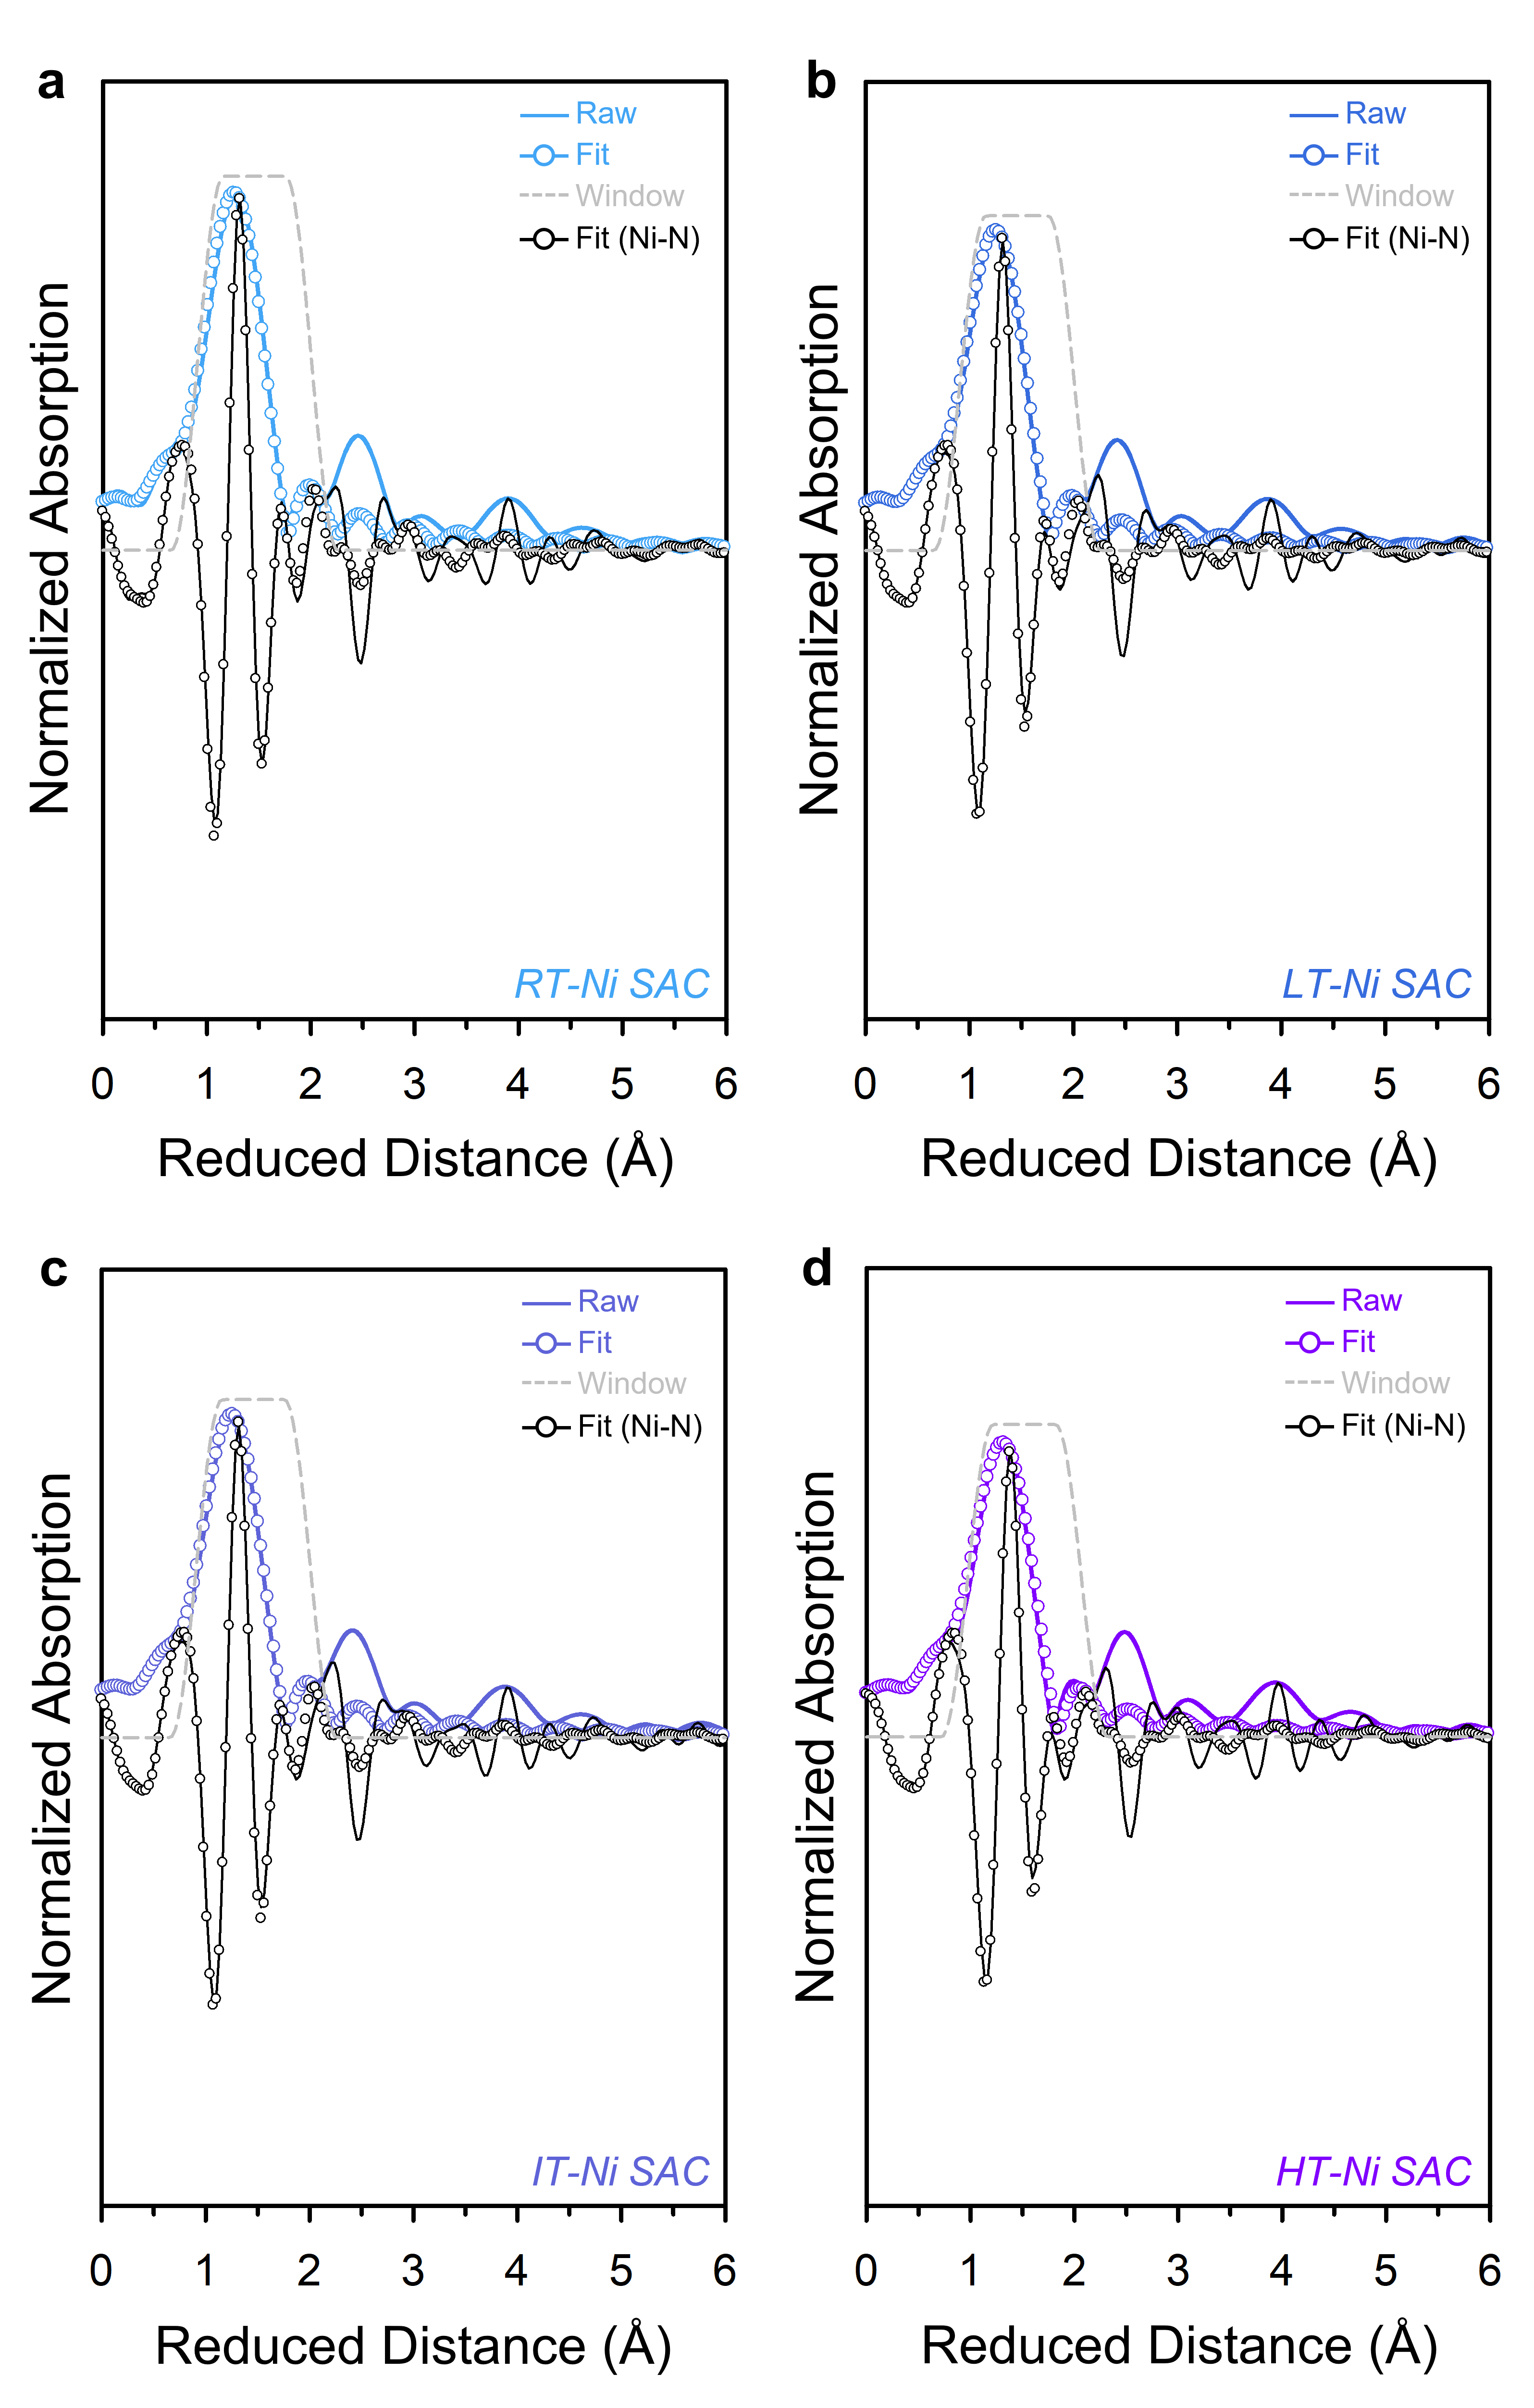


**Supplementary Fig. 8** | **a–d,** EXAFS fitting results in *R* space for RT-Ni SAC (**a**), LT-Ni SAC (**b**), IT-Ni SAC (**c**), and HT-Ni SAC (**d**).


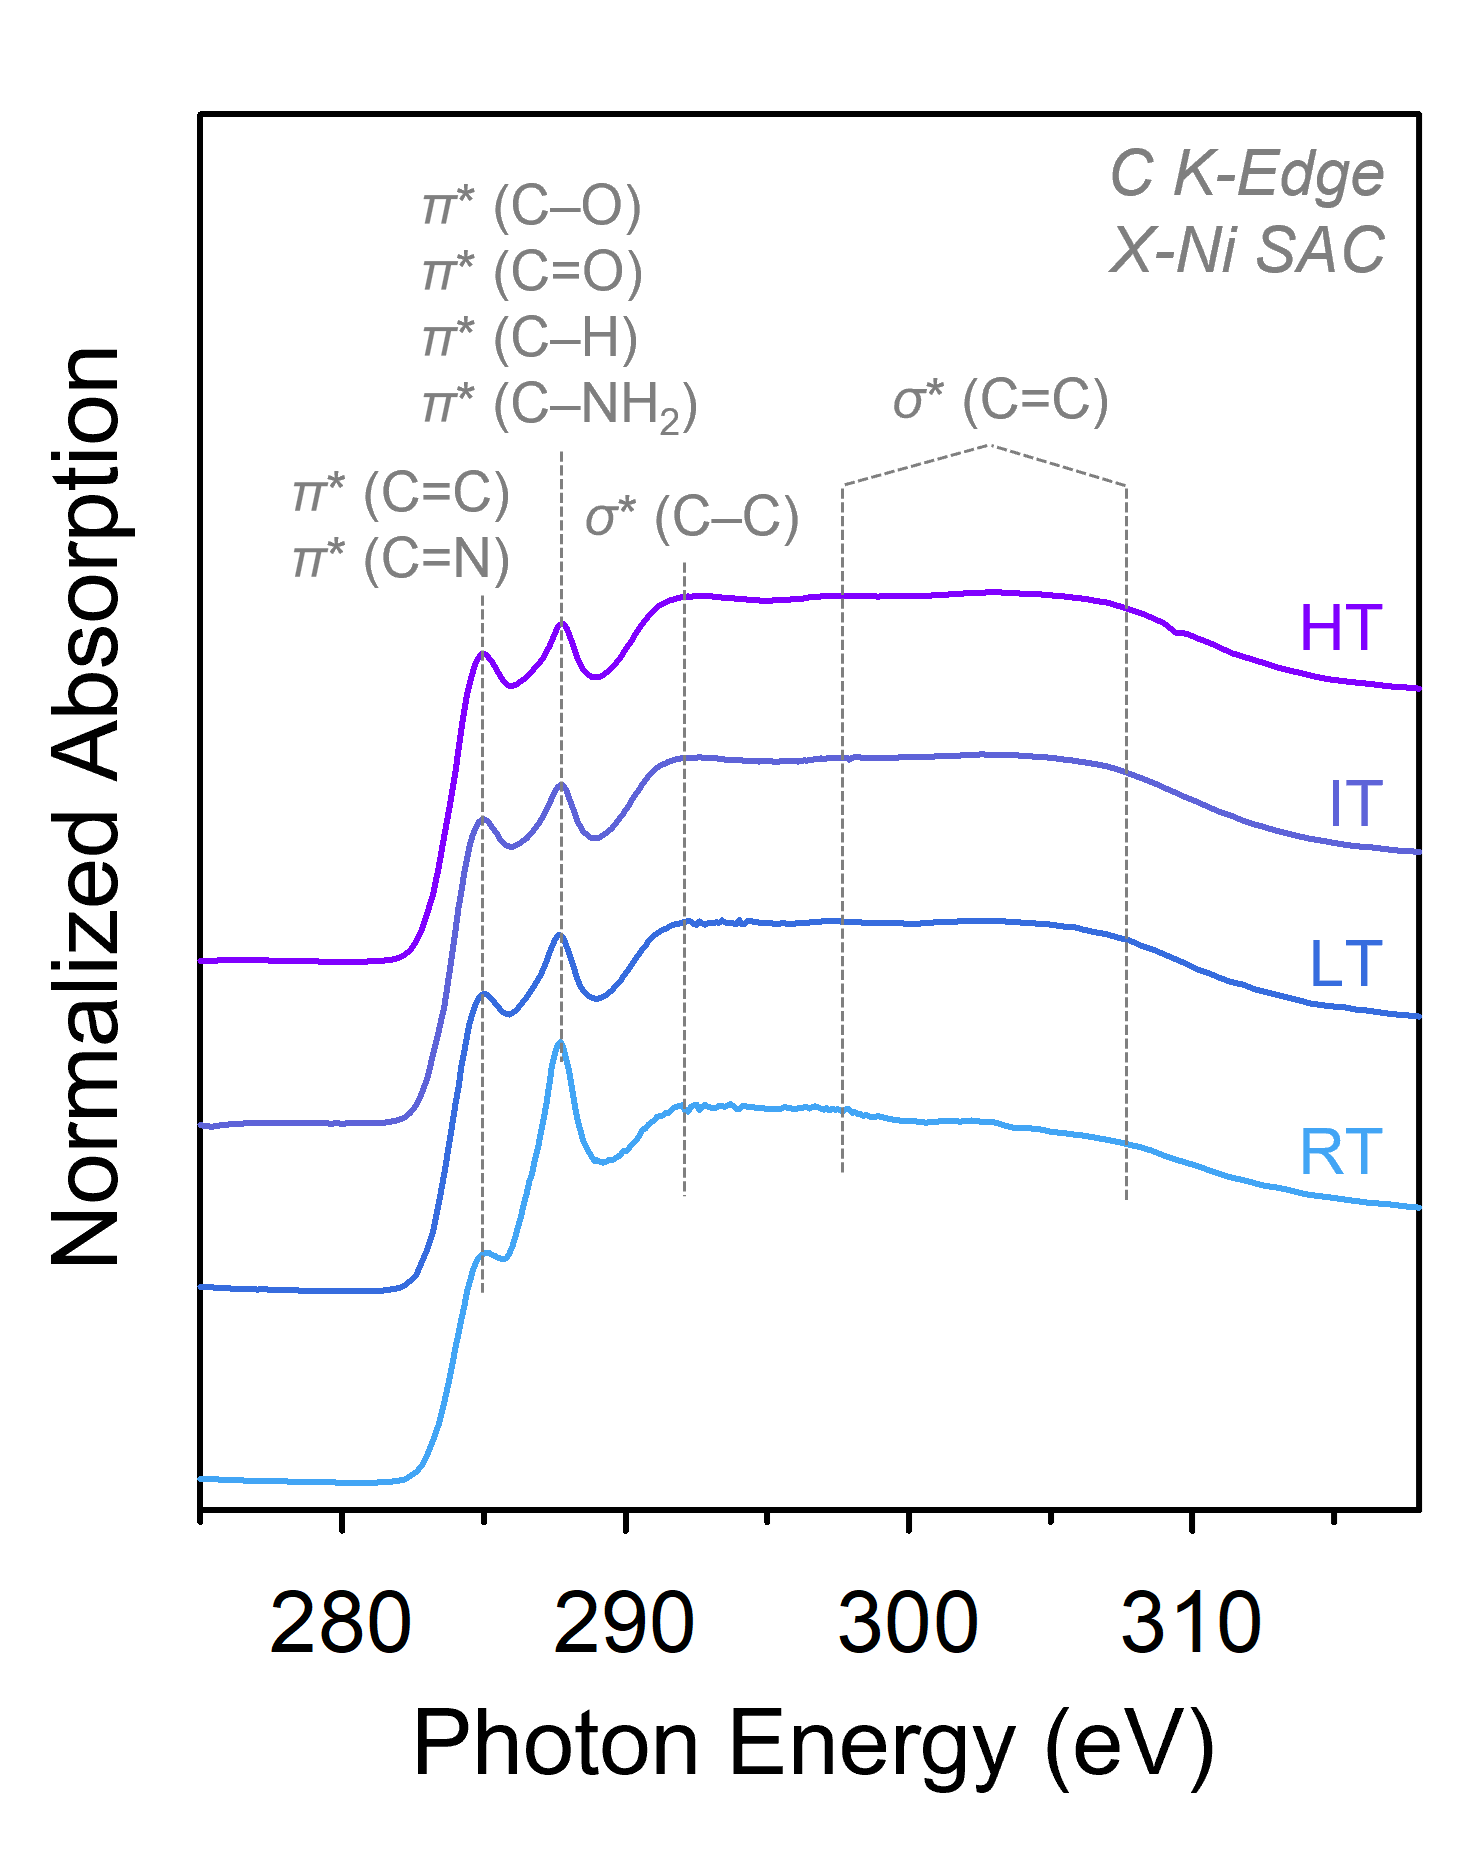


**Supplementary Fig. 9** | C K-edge NEXAFS spectra of *X*-Ni SACs.


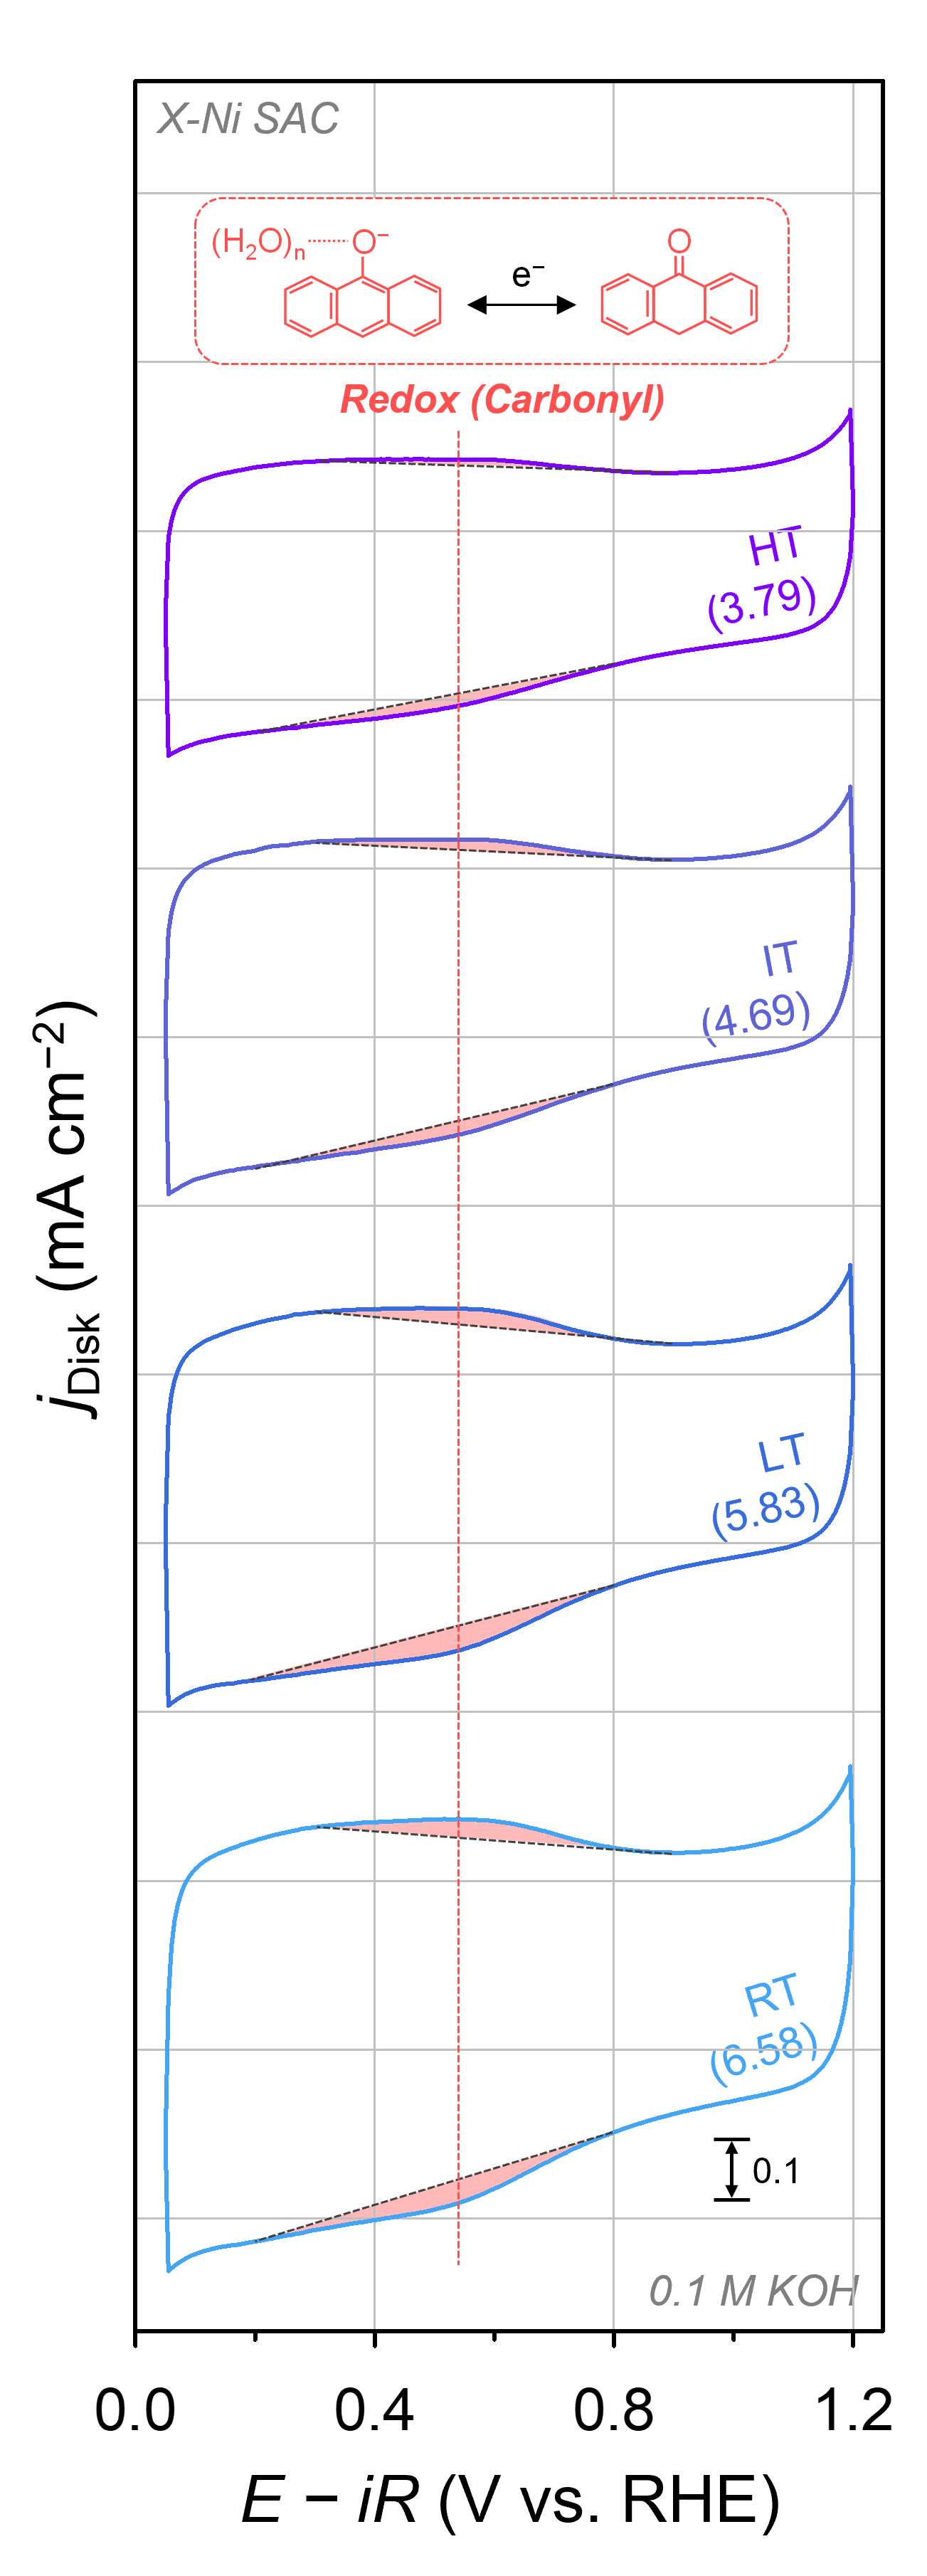


**Supplementary Fig. 10** | CV curves of *X*-Ni SACs recorded in Ar-saturated 0.1 M KOH at a scan rate of 20 mV s−1.


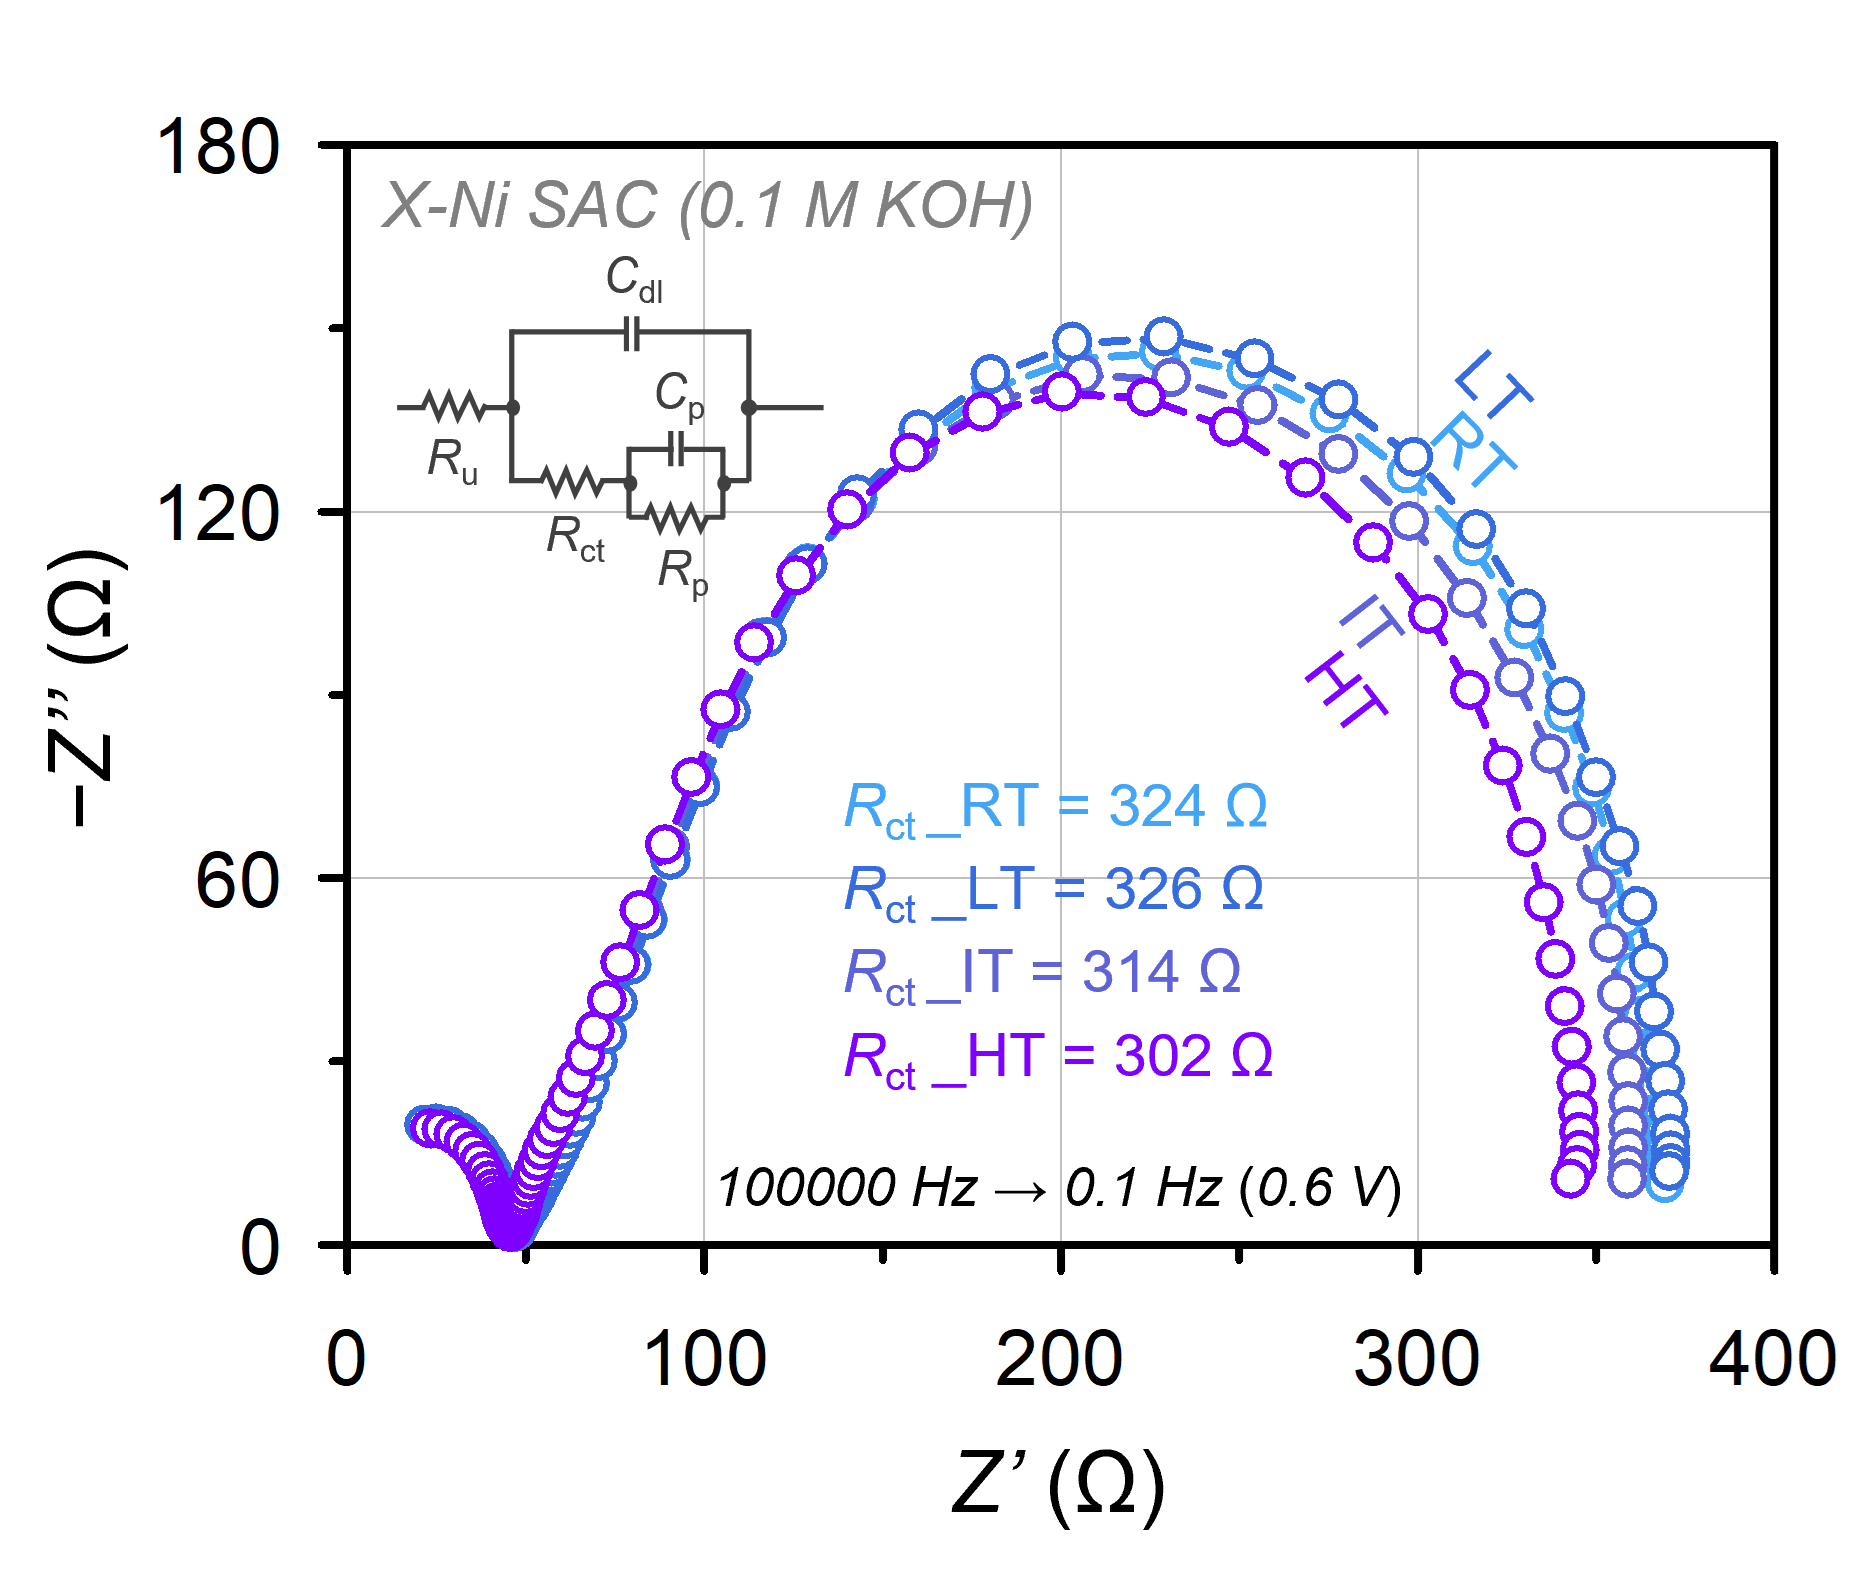


**Supplementary Fig. 11** | Nyquist plots obtained from EIS measurements of *X*-Ni SACs recorded at 0.6 V (vs. RHE). The equivalent circuit used for EIS fitting is shown in the plot.


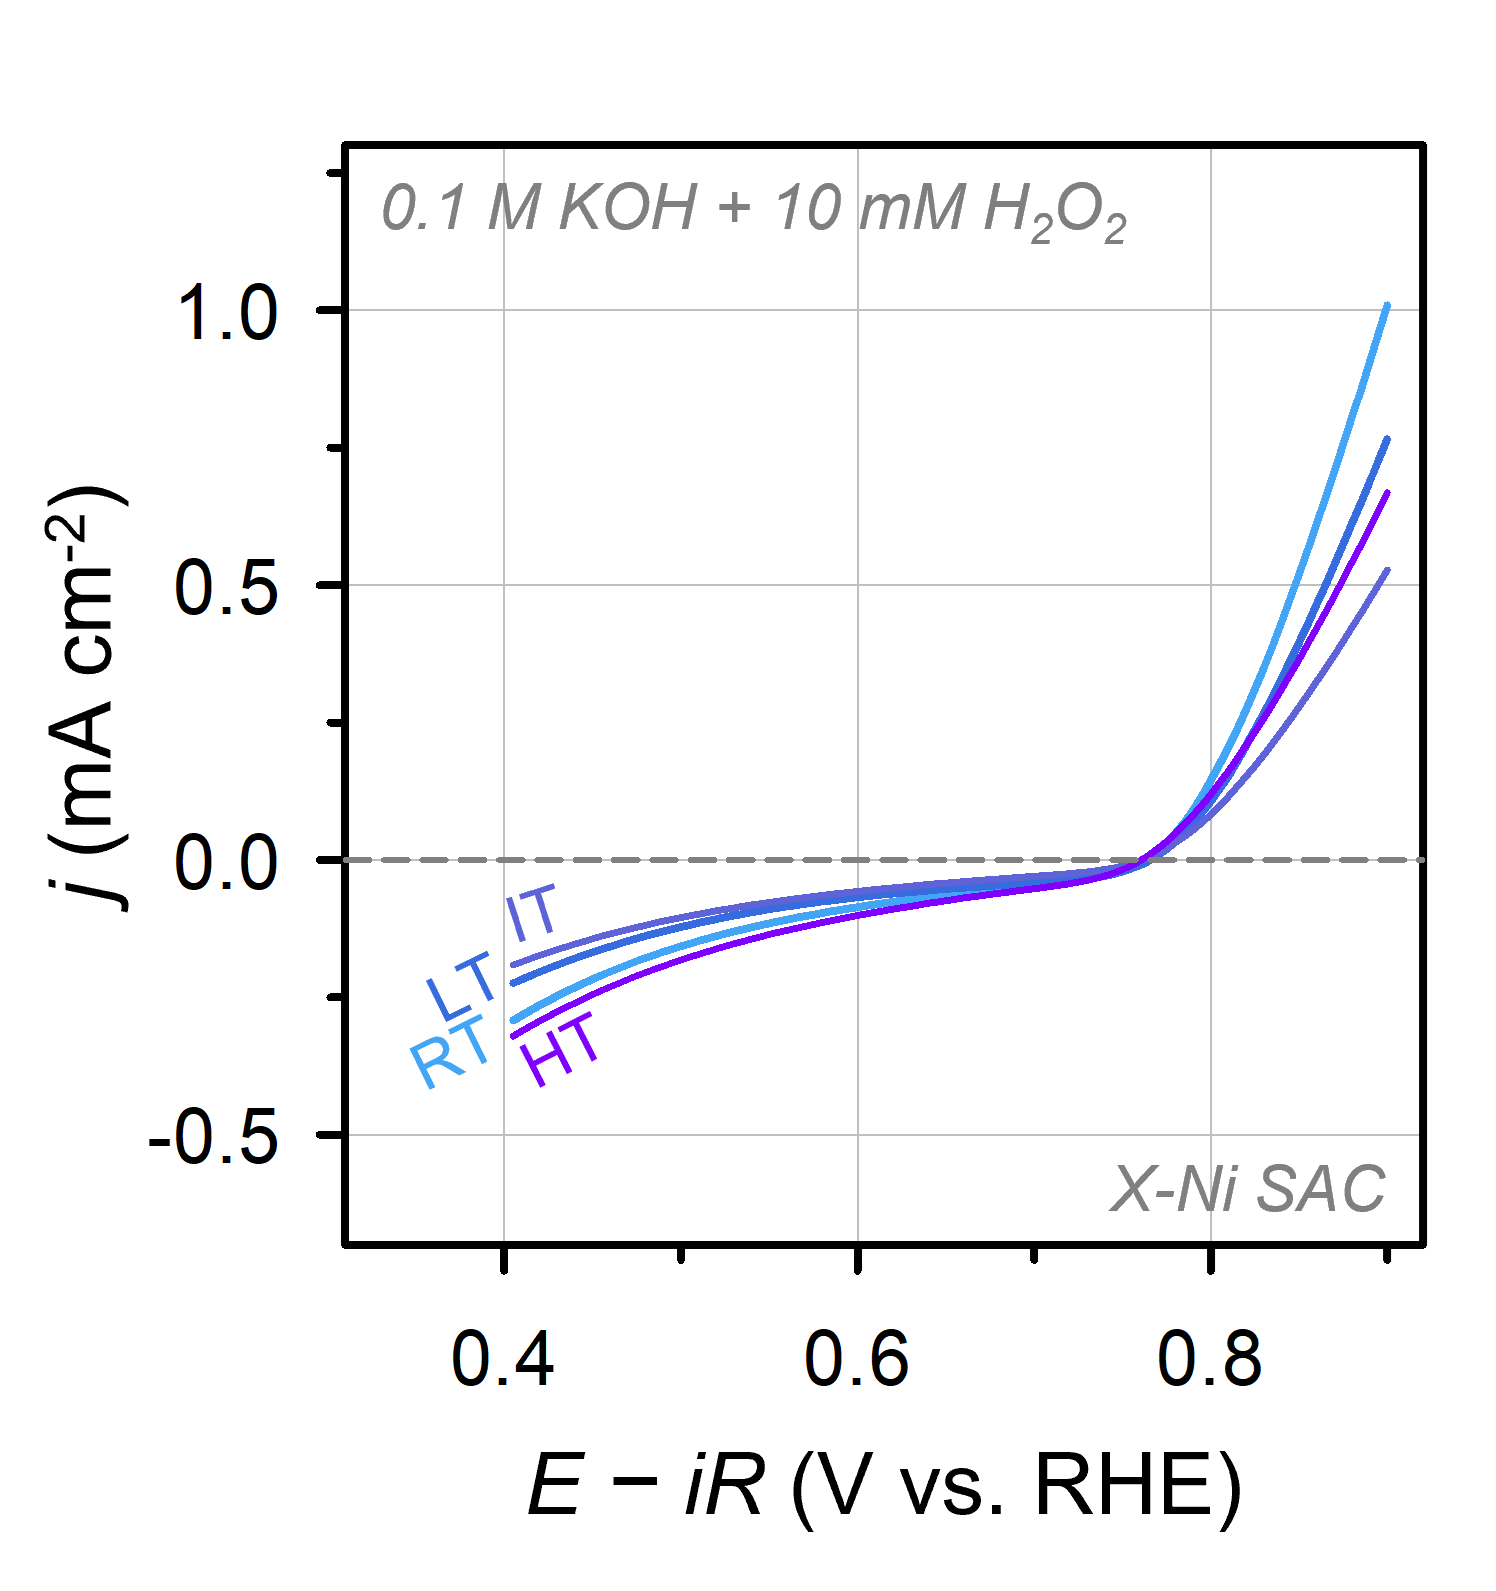


**Supplementary Fig. 12** | HPR polarization curves of *X*-Ni SACs recorded in N2-saturated 0.1 M KOH containing 10 mM H2O2.


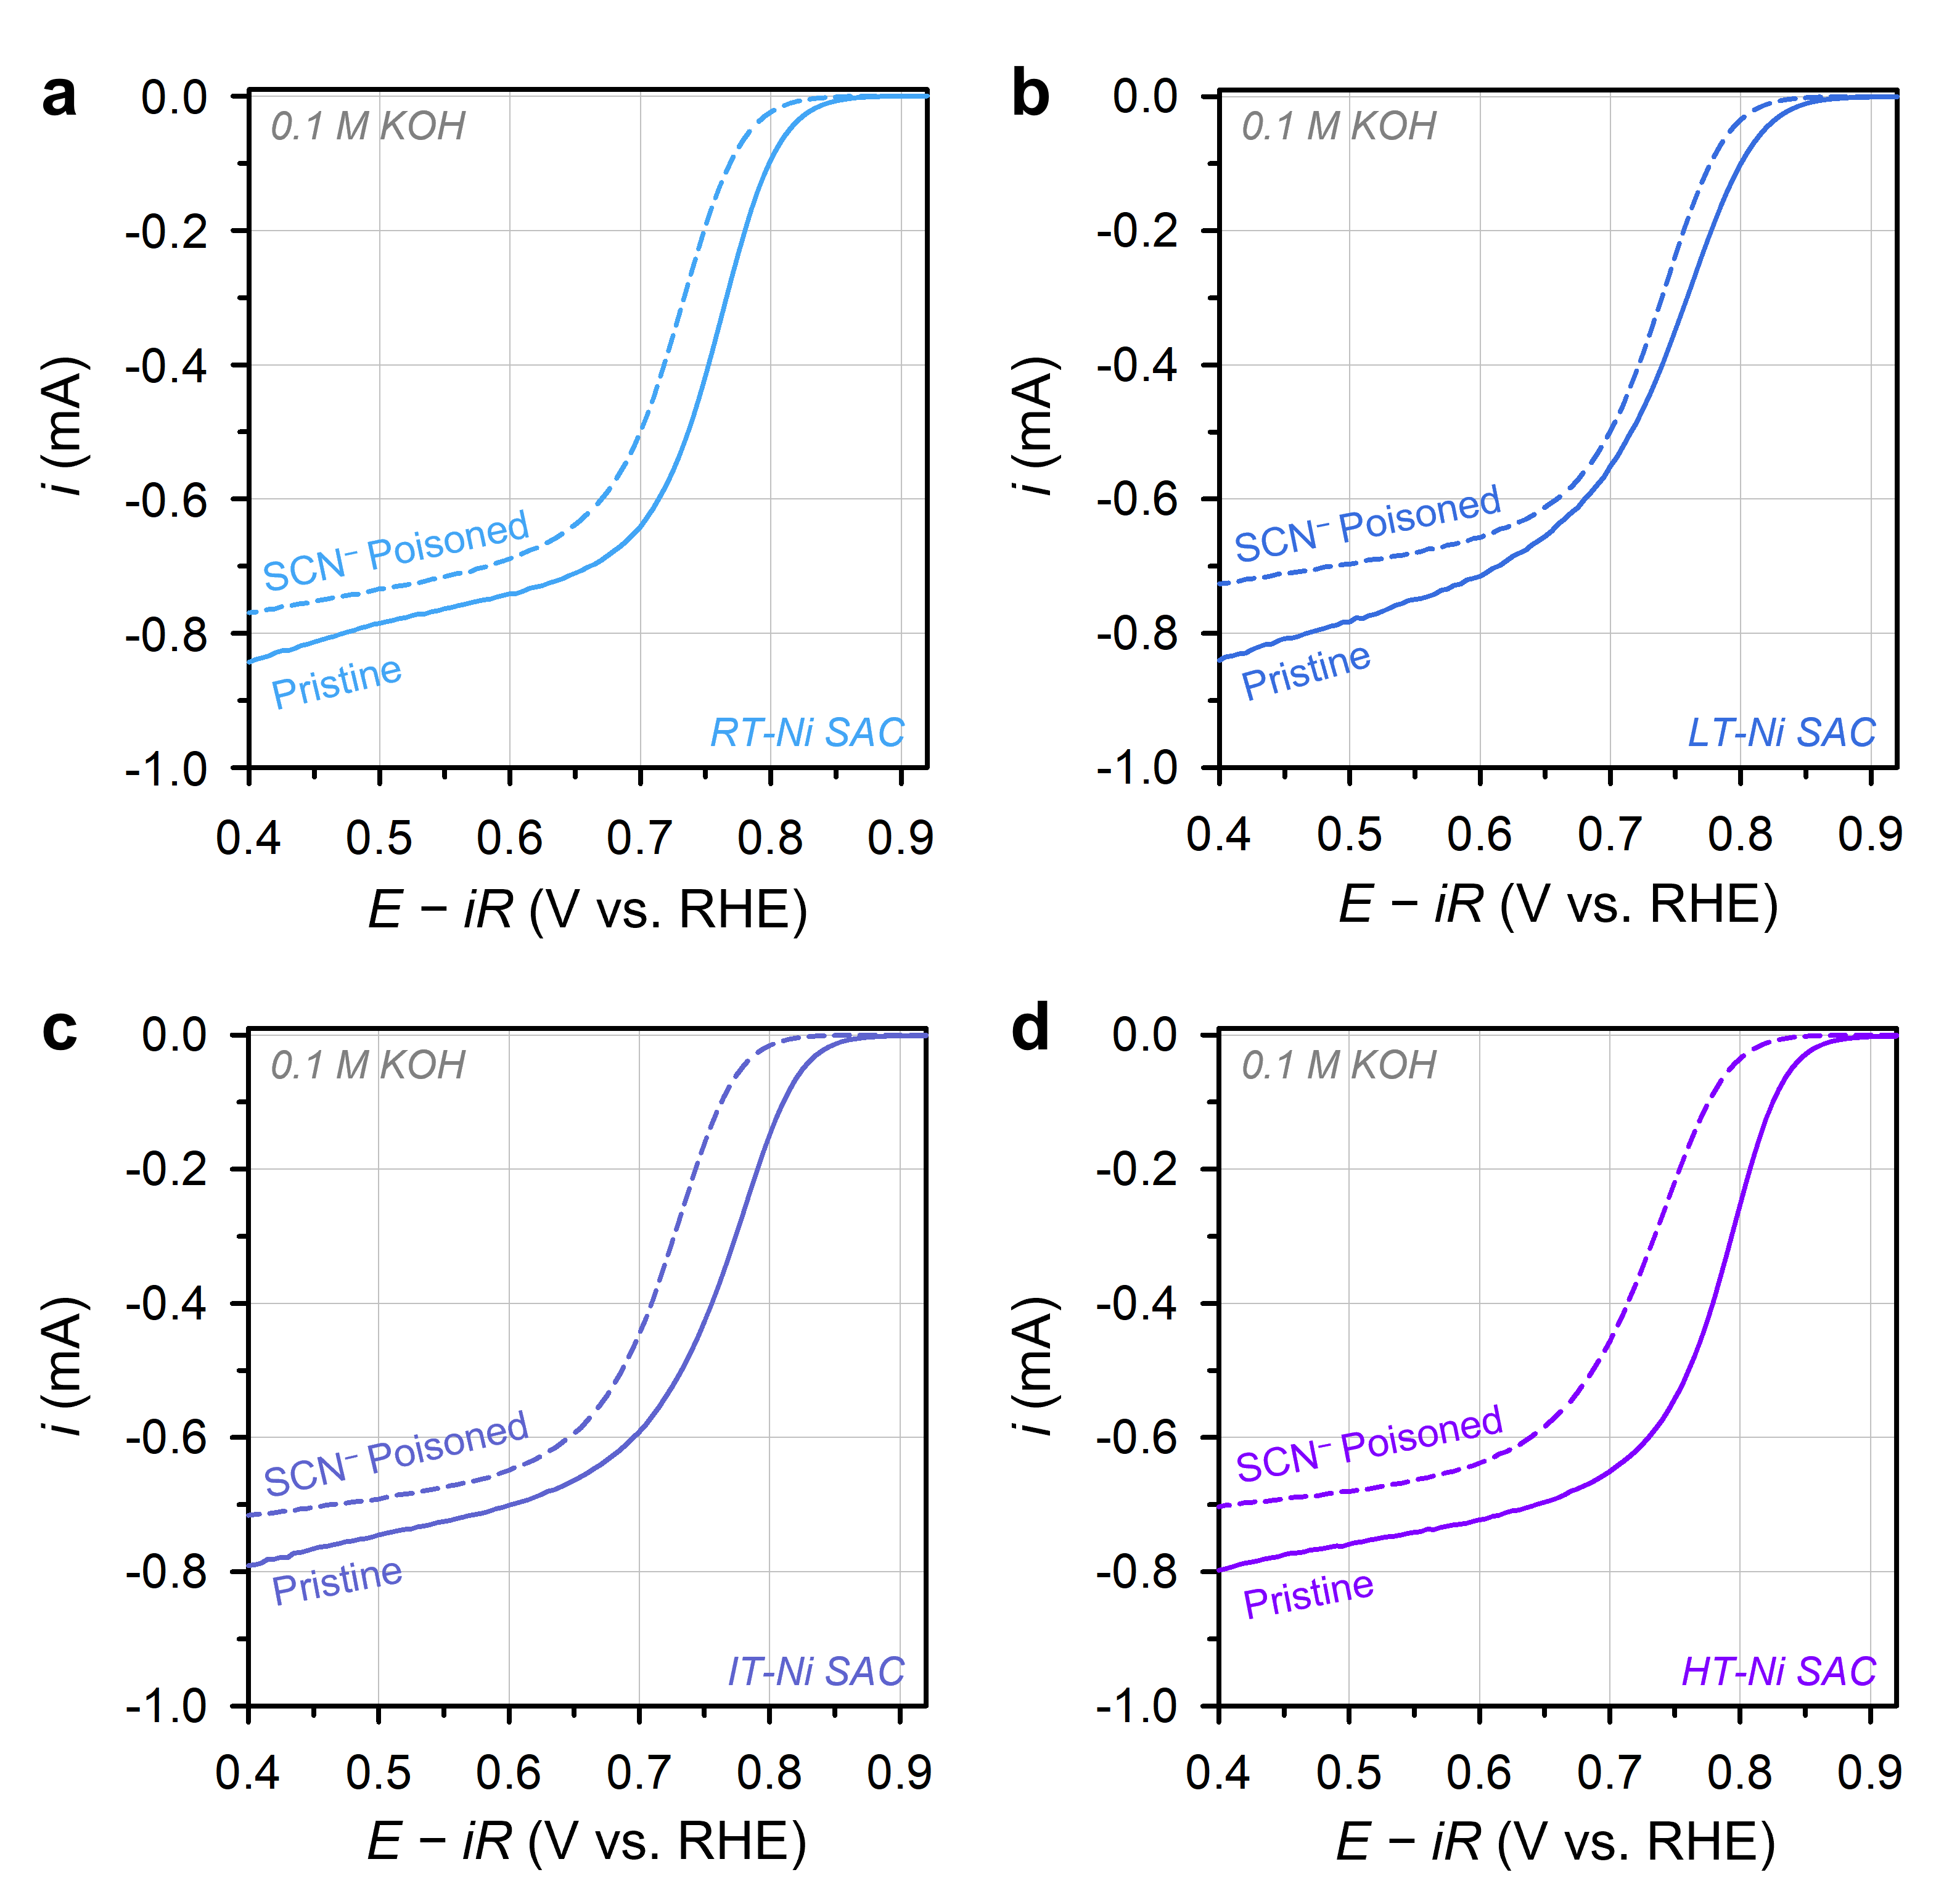


**Supplementary Fig. 13** | **a–d,** ORR LSV curves of RT-Ni SAC (**a**), LT-Ni SAC (**b**), IT-Ni SAC (**c**), and HT-Ni SAC (**d**) recorded in 0.1 M KOH in the absence and presence of SCN−.


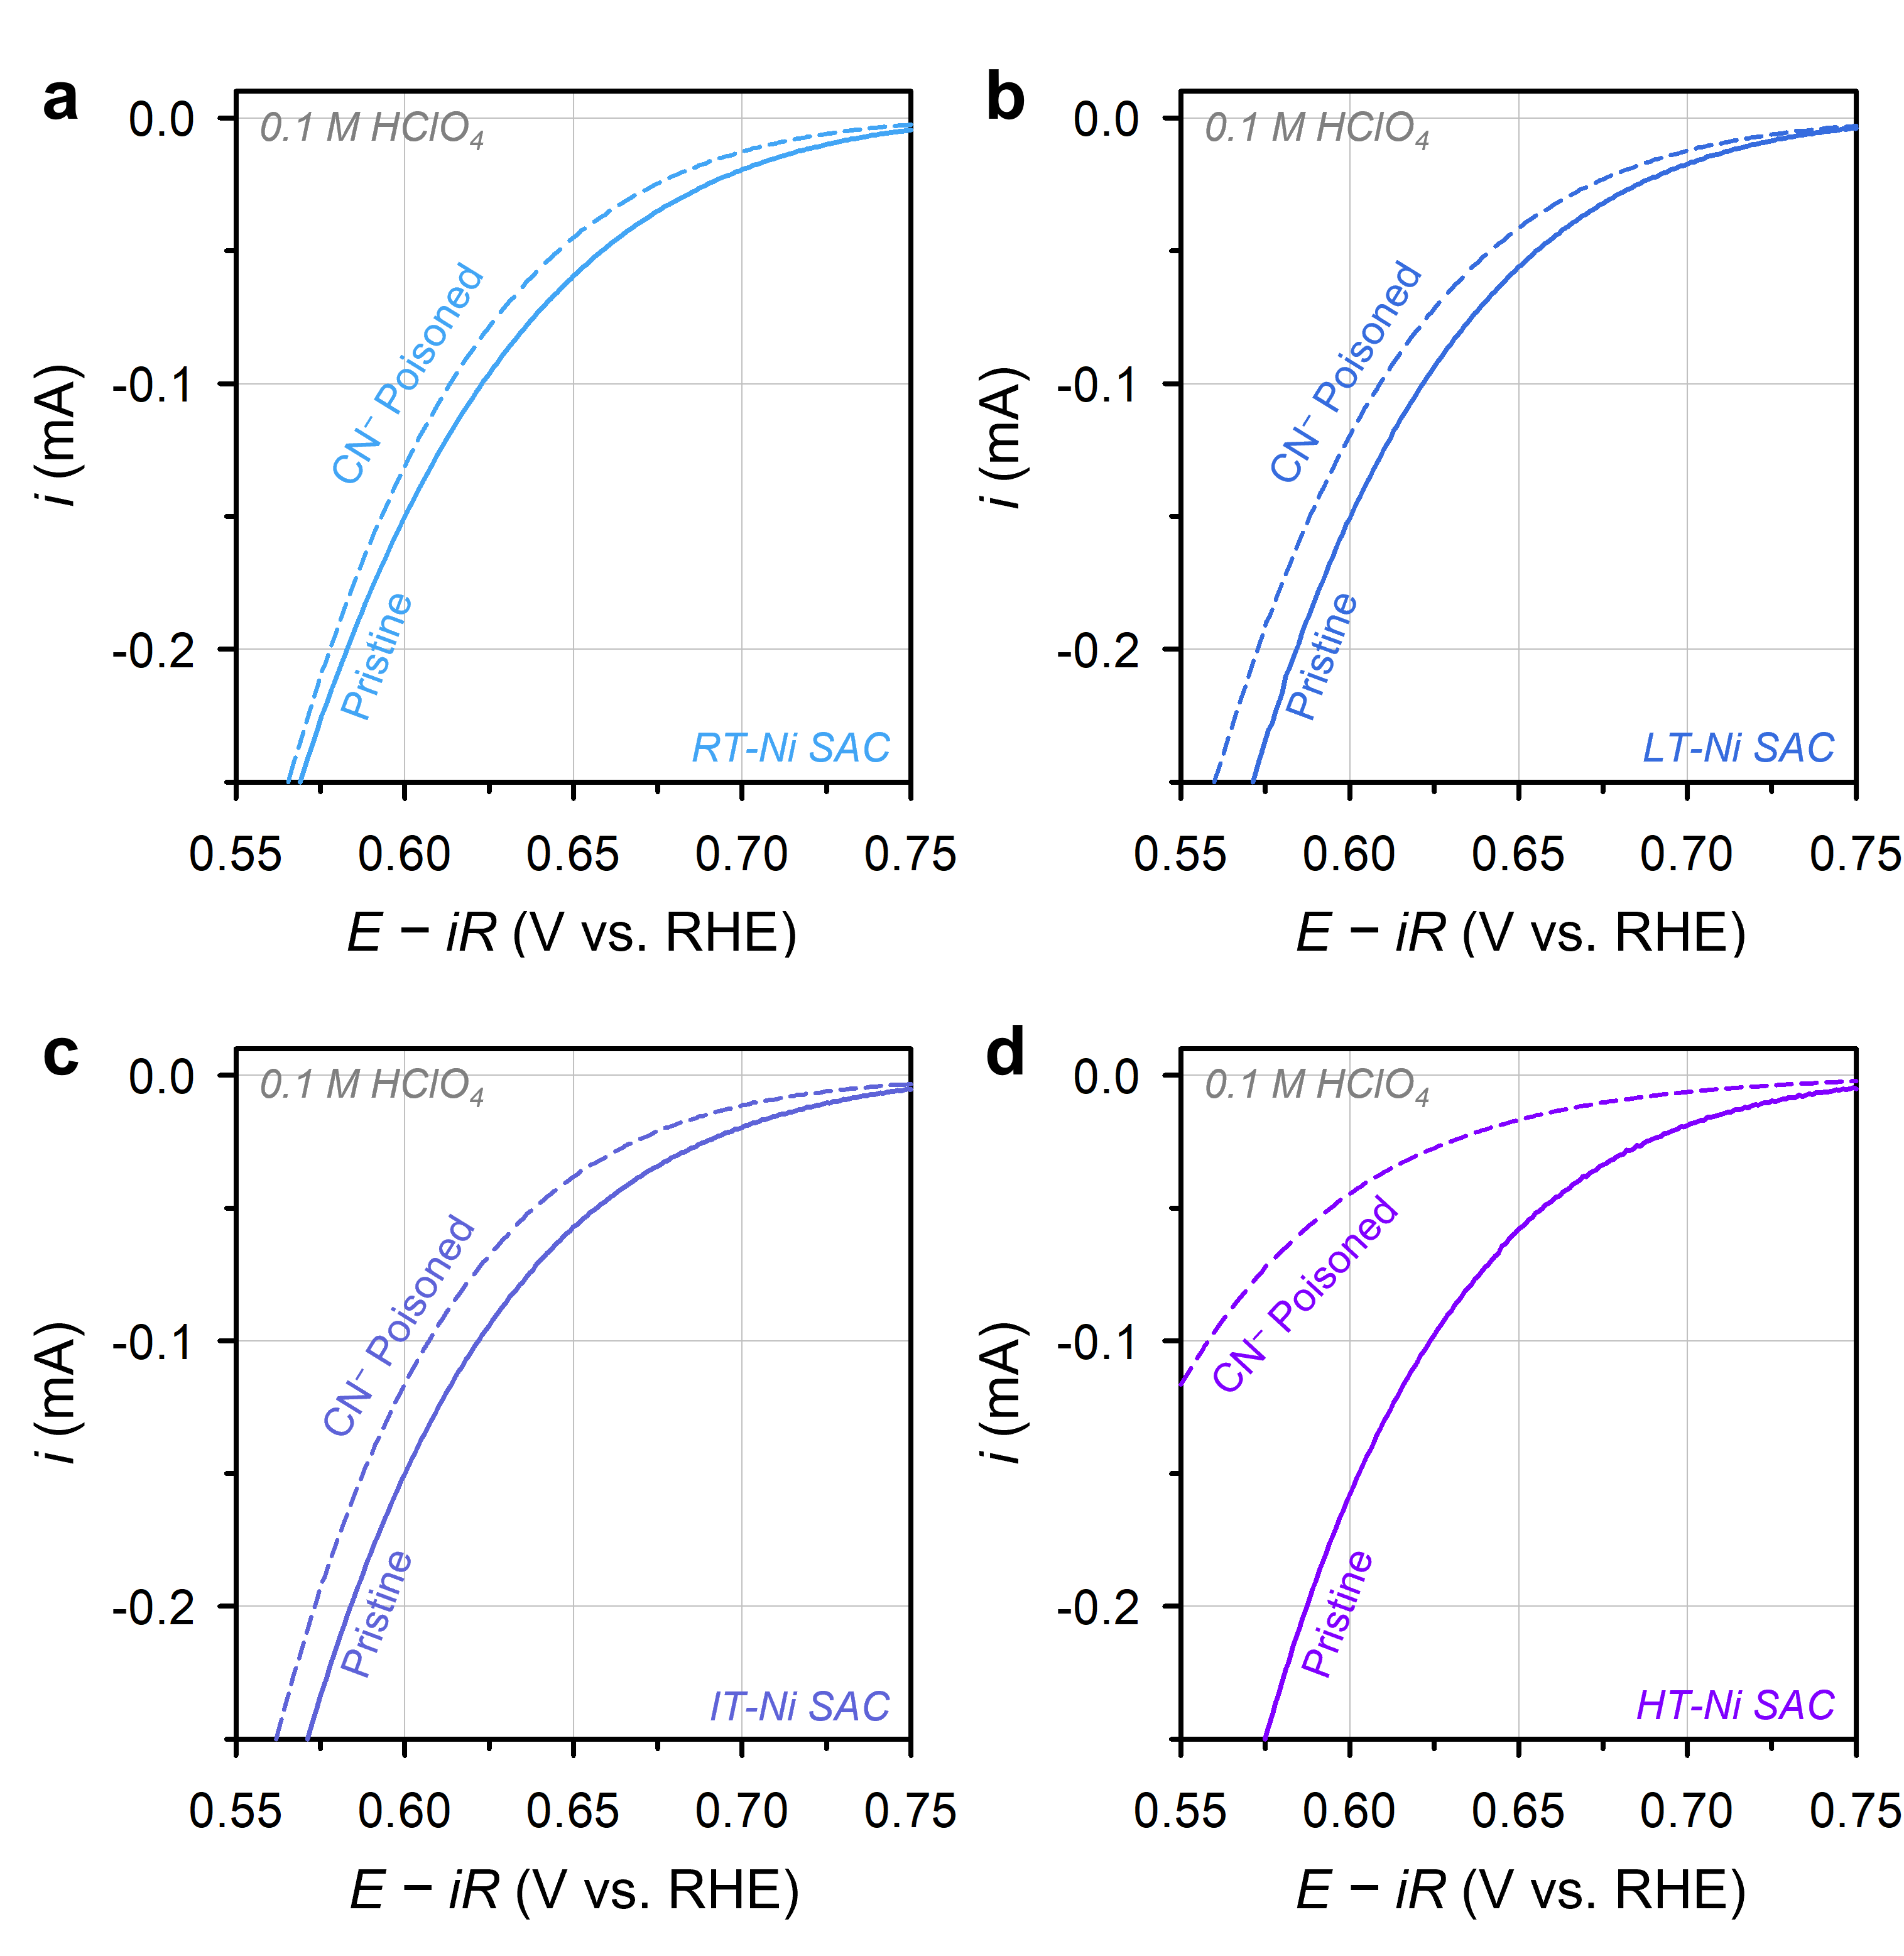


**Supplementary Fig. 14** | **a–d,** ORR LSV curves of RT-Ni SAC (**a**), LT-Ni SAC (**b**), IT-Ni SAC (**c**), and HT-Ni SAC (**d**) recorded in 0.1 M HClO4 in the absence and presence of CN−.


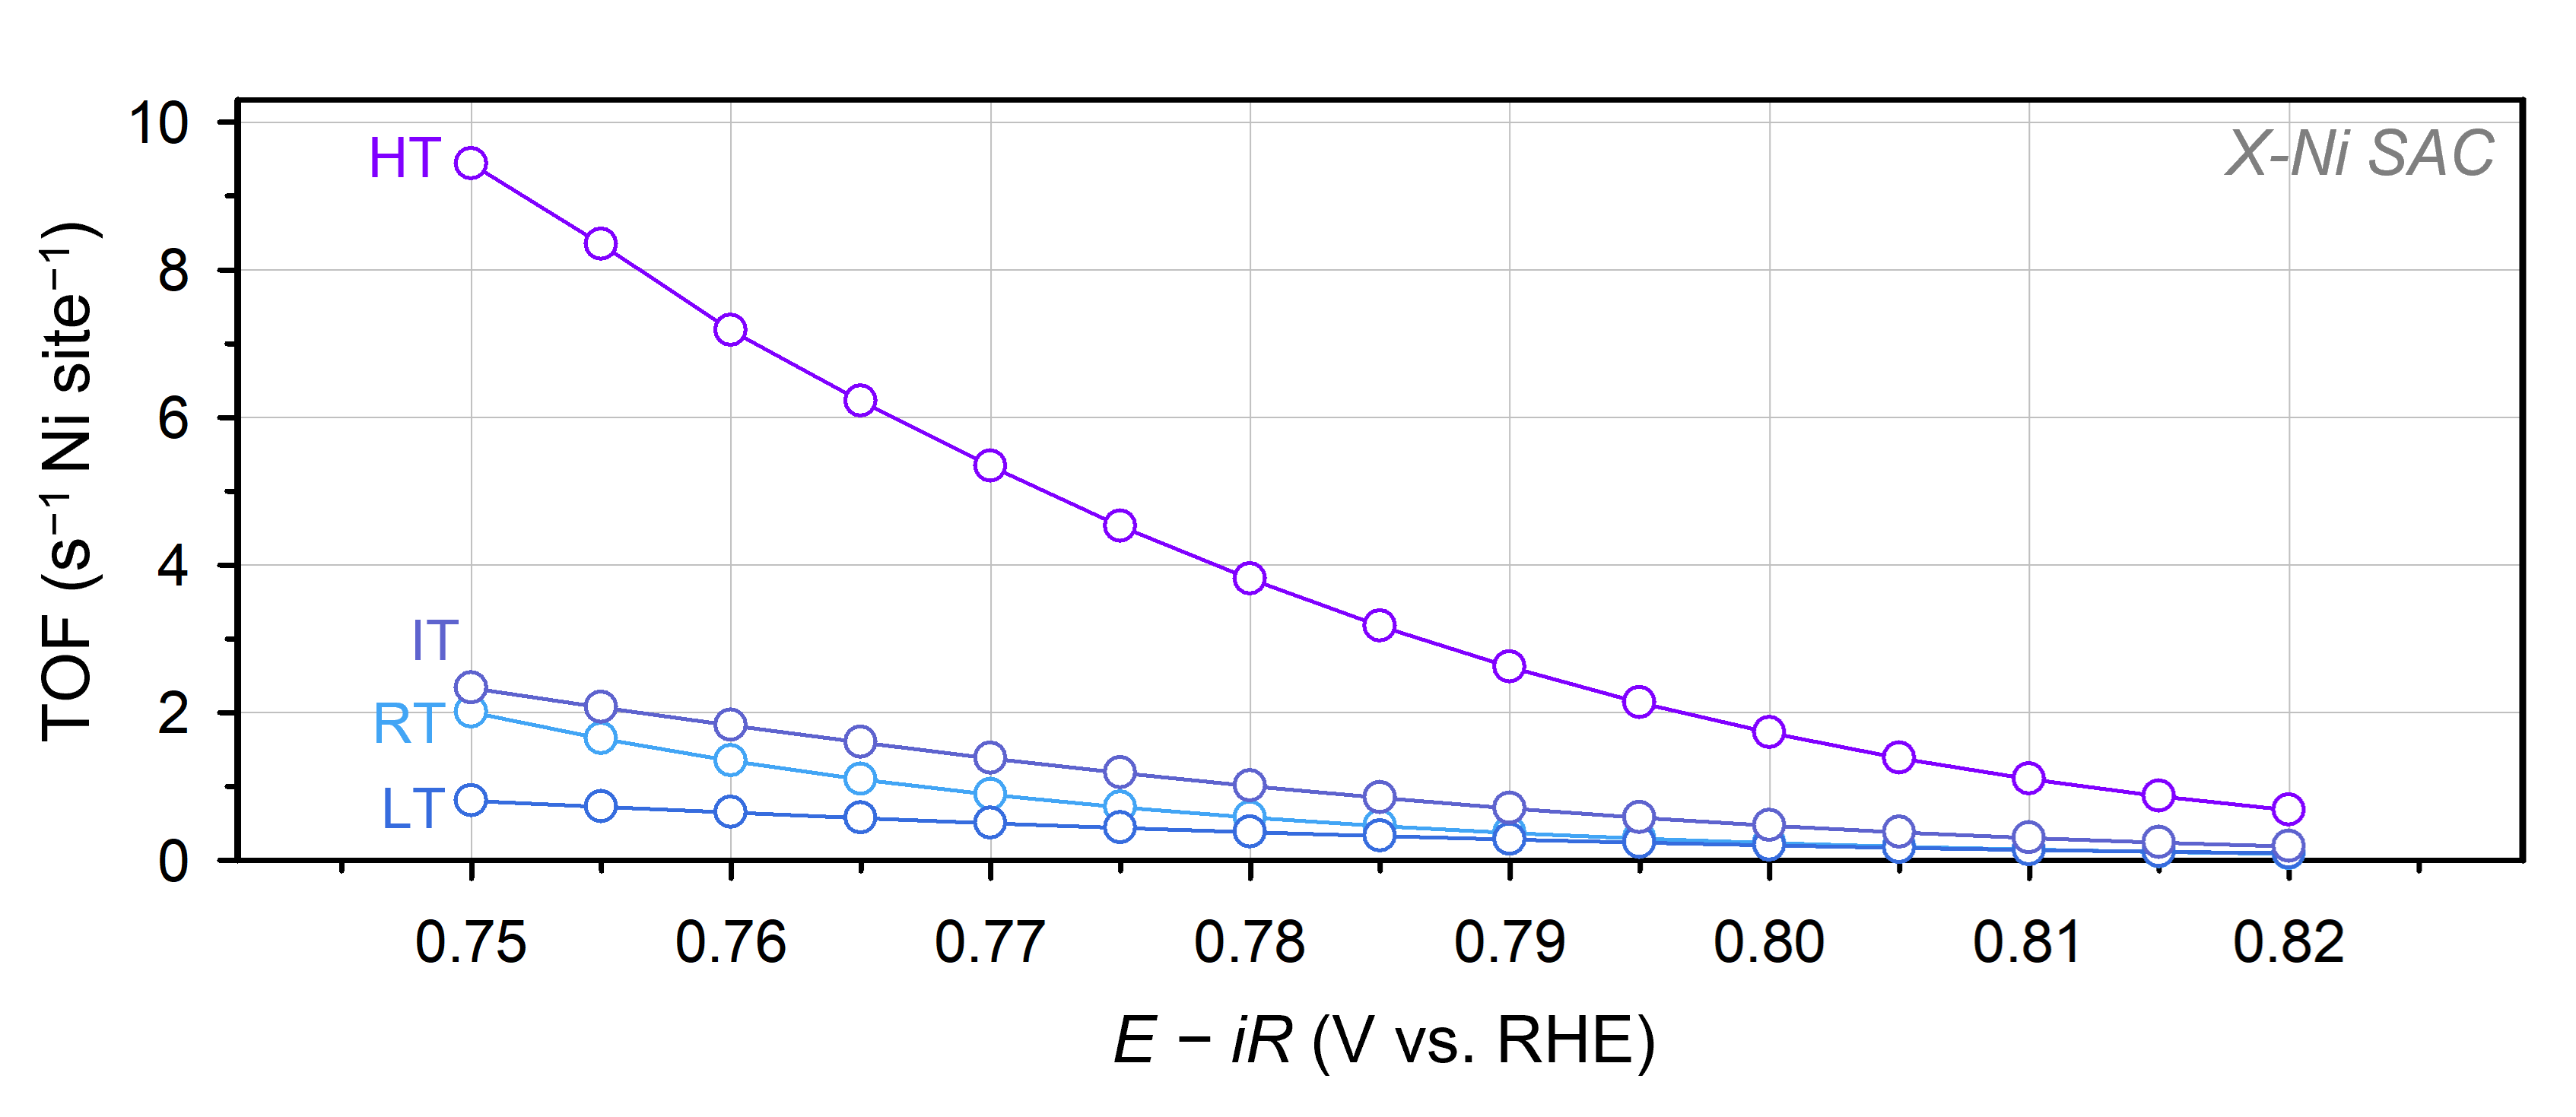


**Supplementary Fig. 15** | TOFs for H­2O2 production of *X*-Ni SACs normalized to Ni single-atom sites.

**Supplementary Fig. 16** | Detailed schematic illustration for the PV-SAEC system.


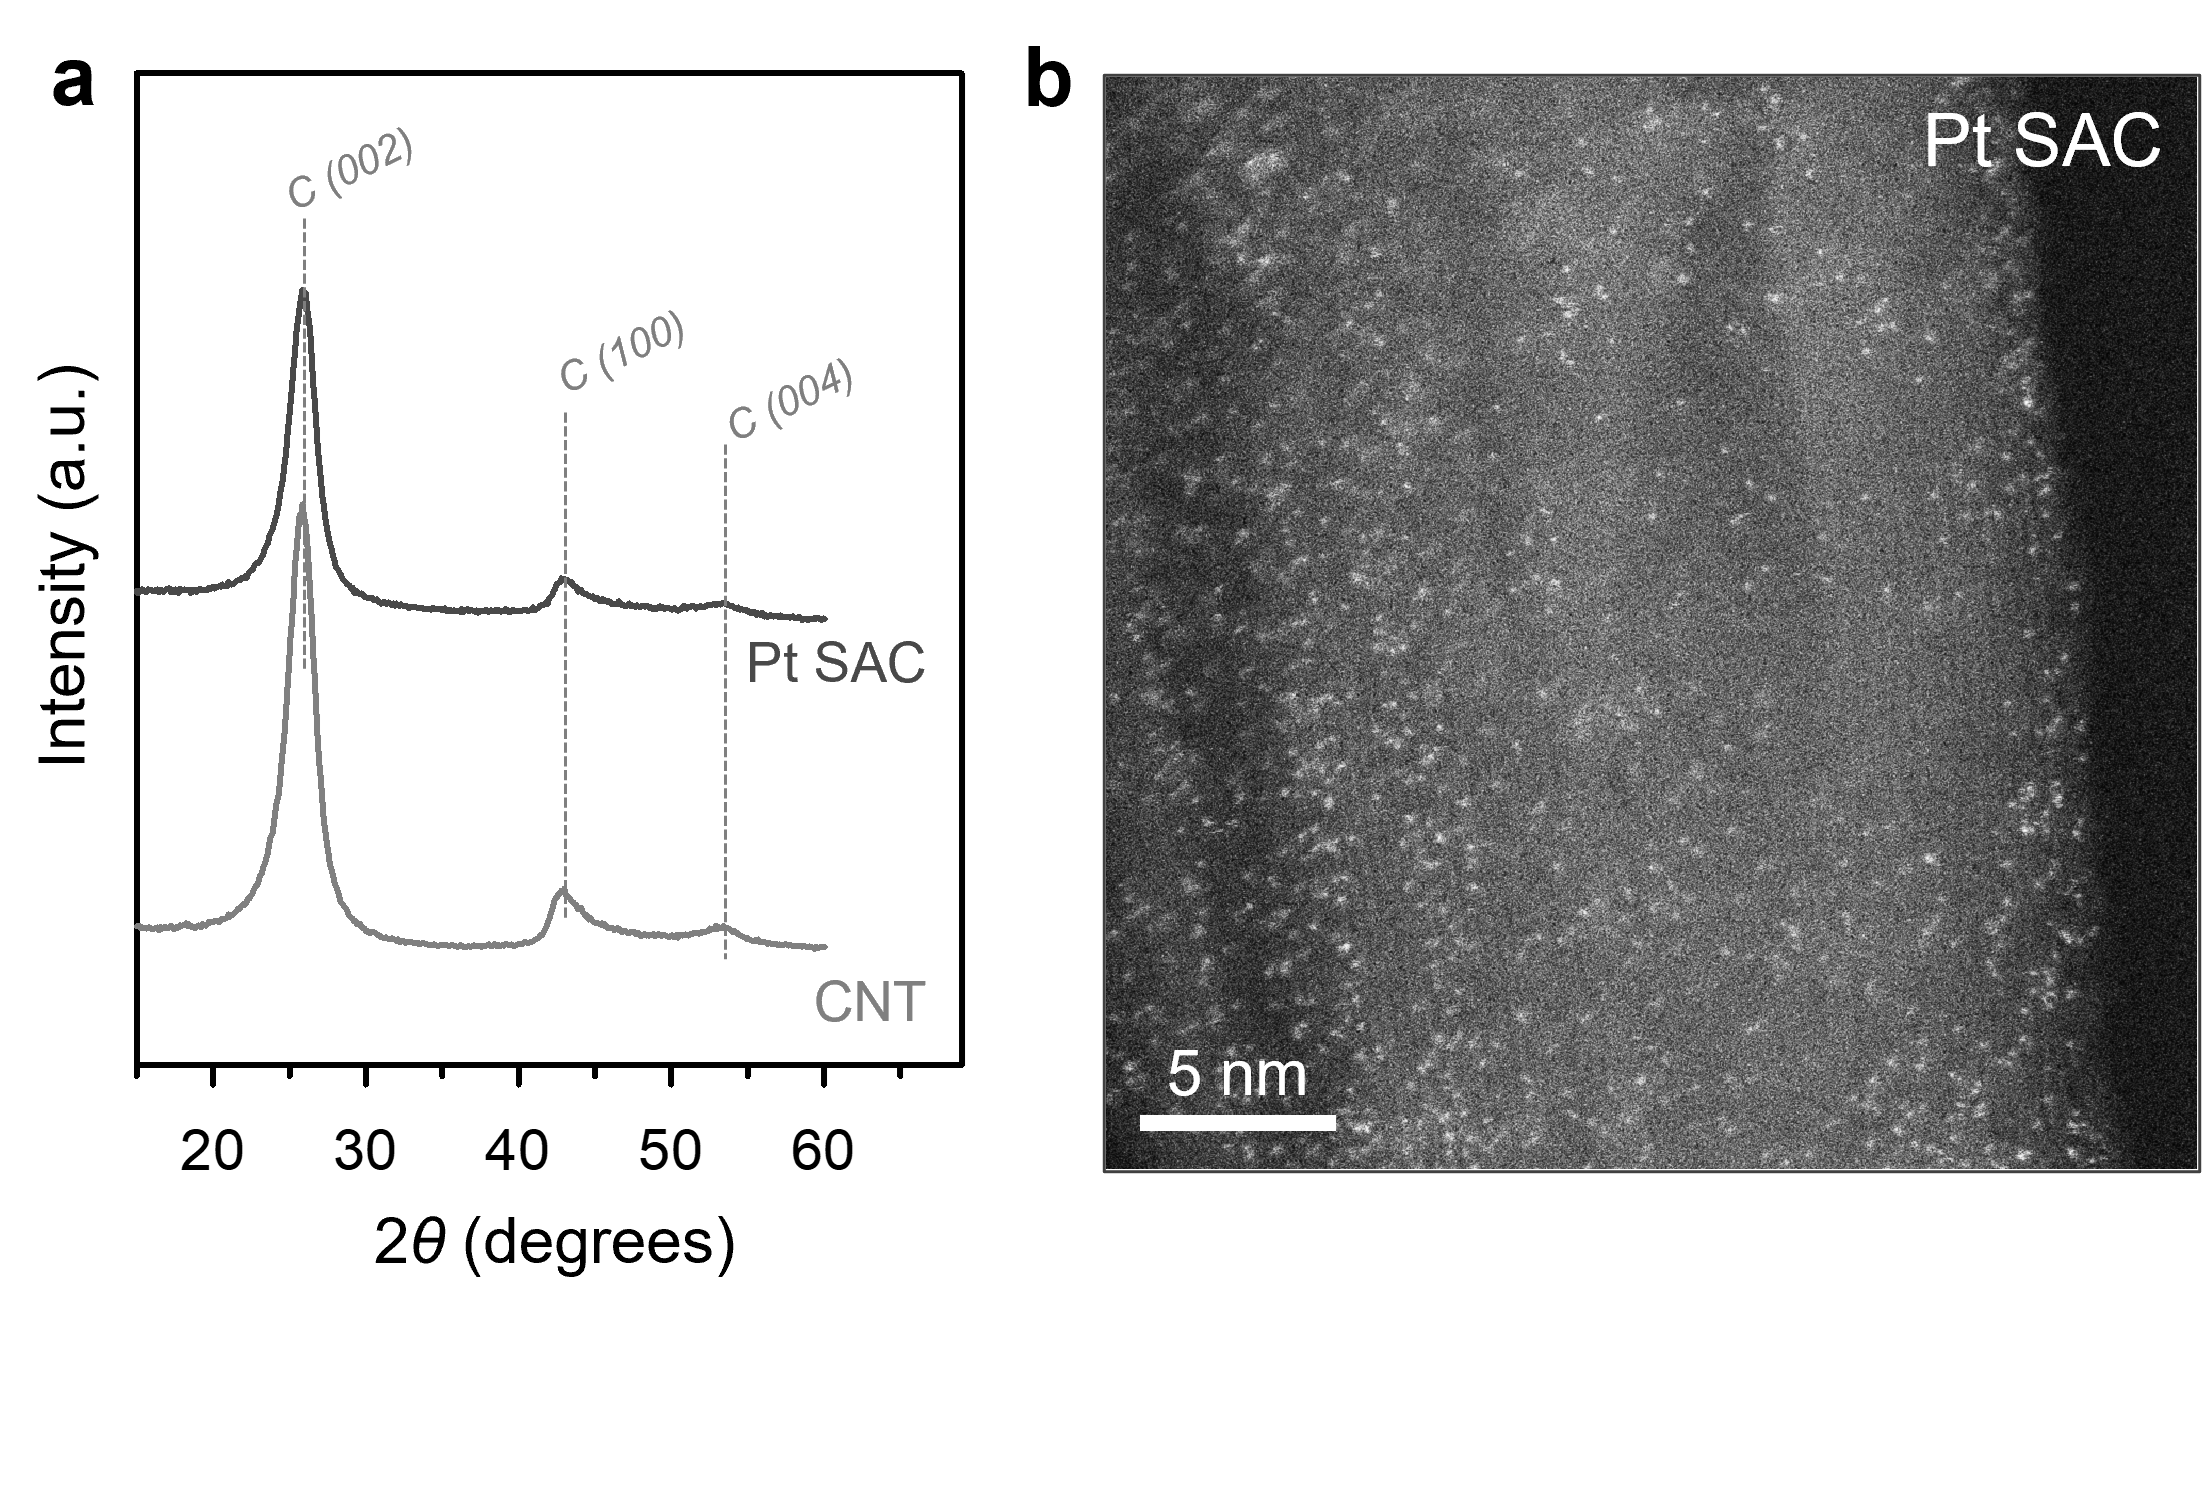


**Supplementary Fig. 17** | **a,** Wide-angle XRD patterns of Pt SAC and CNT. **b,** HAADF-STEM image of Pt SAC.


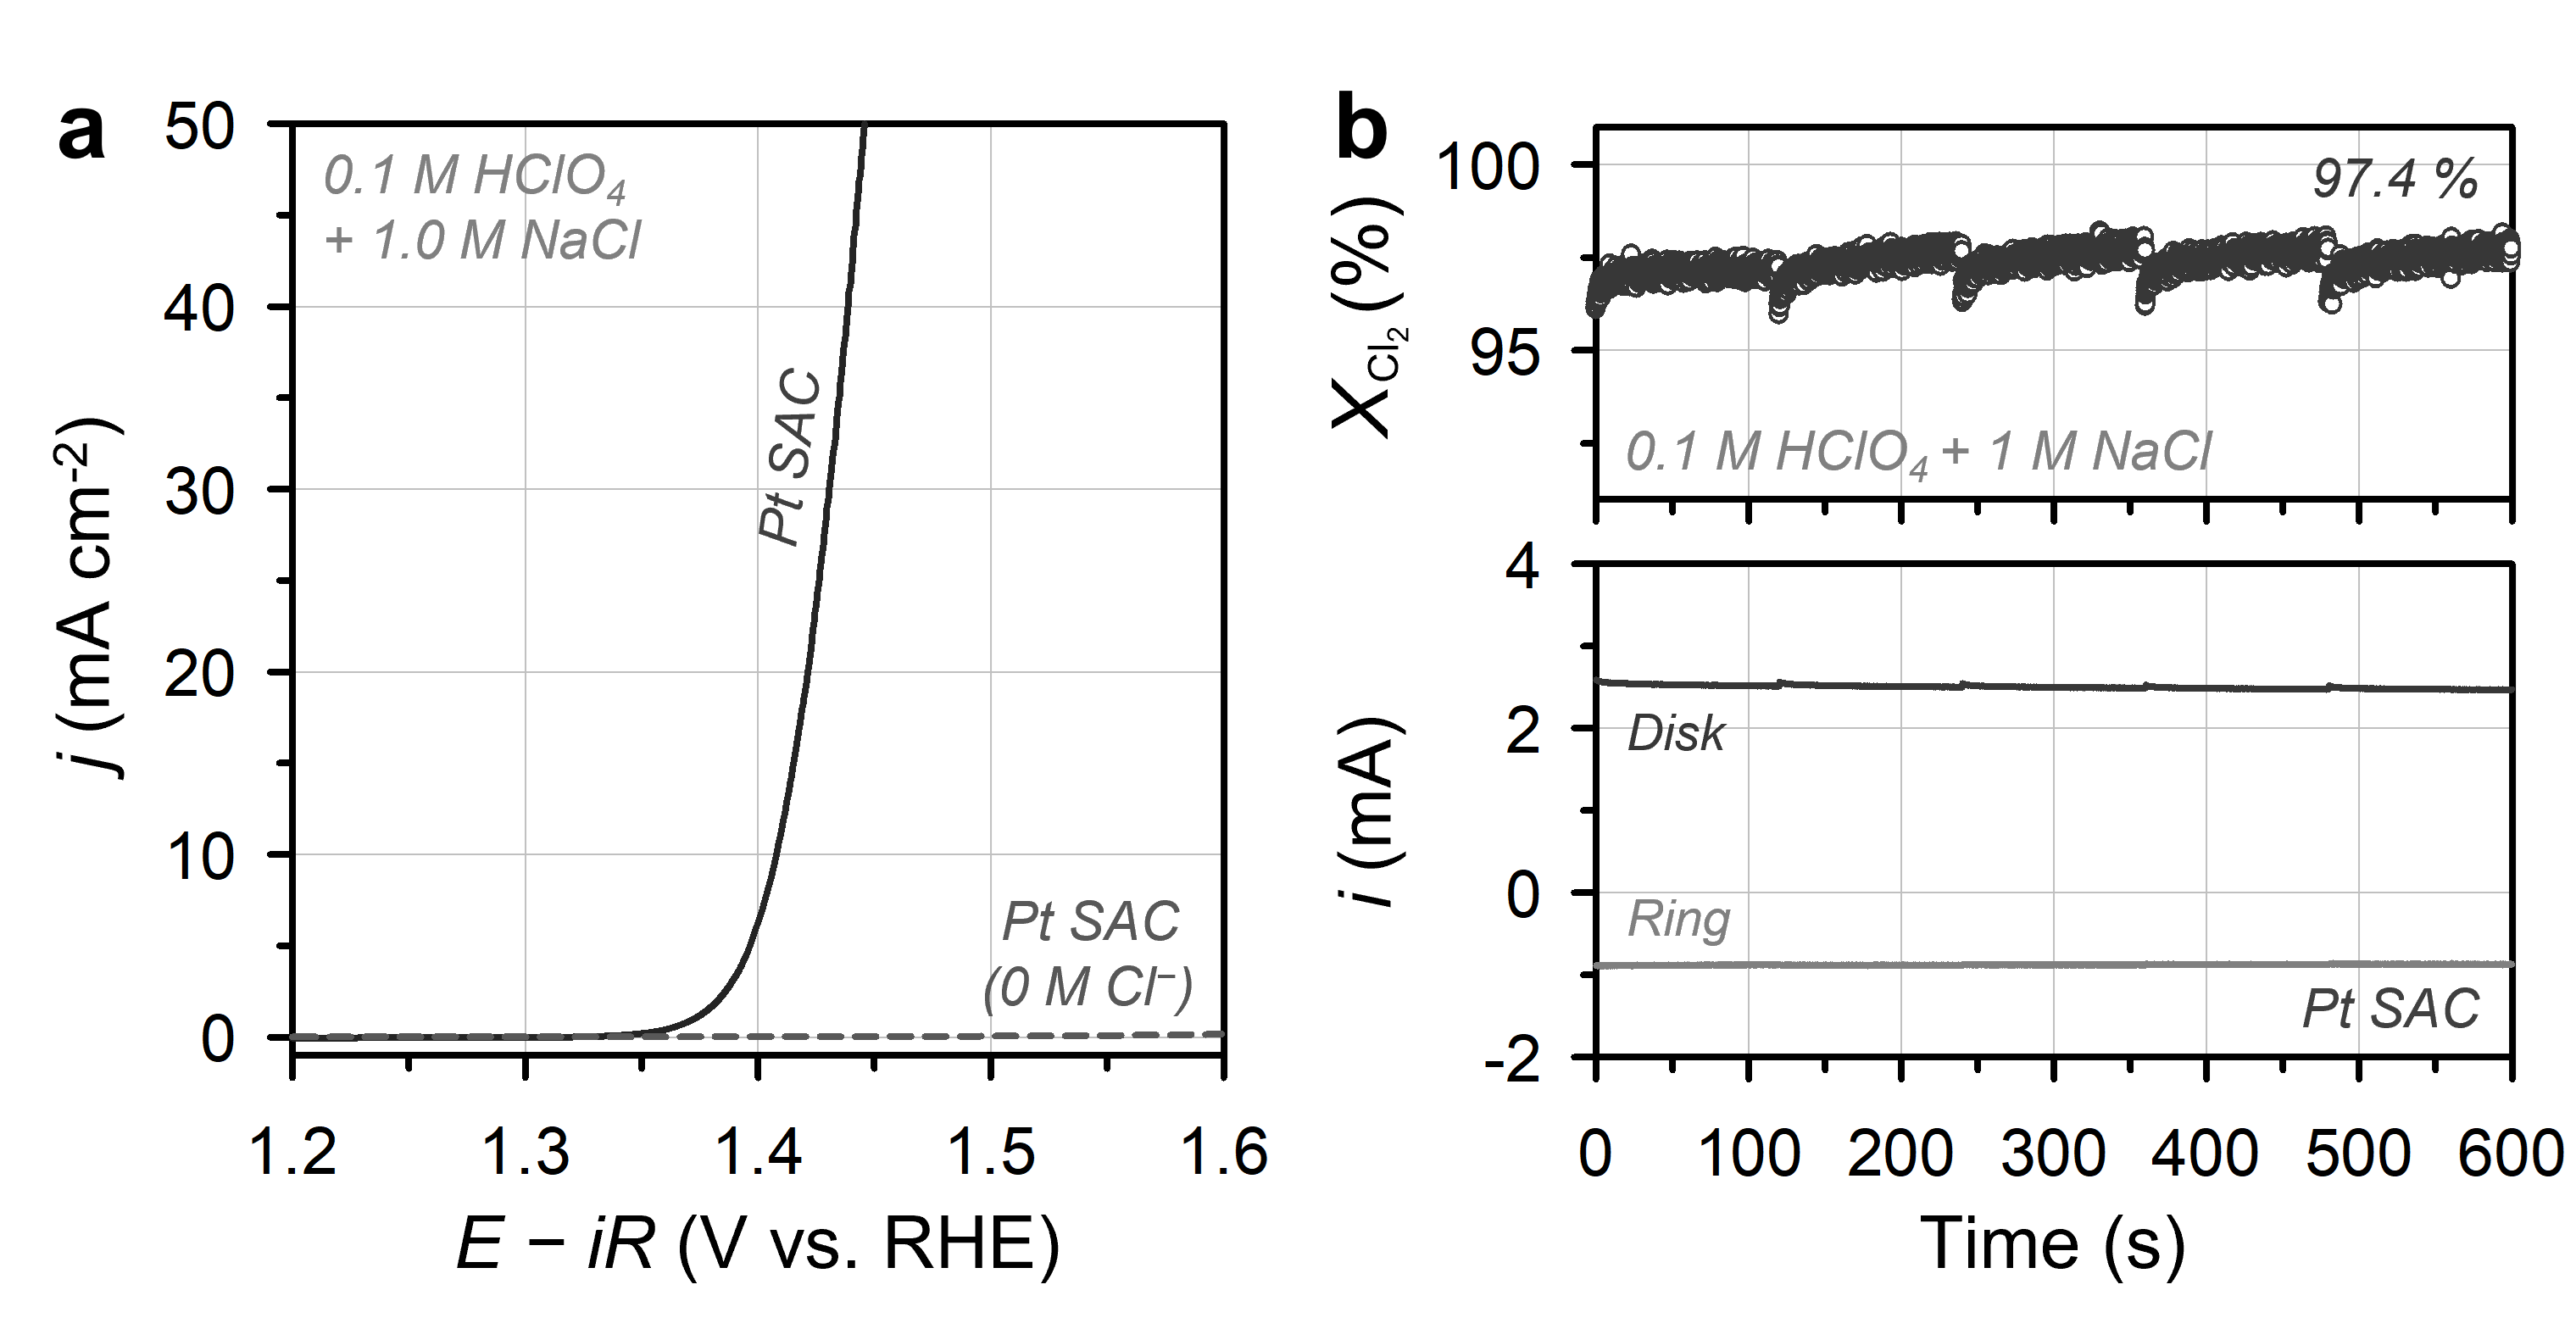


**Supplementary Fig. 18** | **a,** CER polarization curve of Pt SAC obtained in 0.1 M HClO4 + 1.0 M NaCl. The polarization curve of Pt SAC measured in the absence of NaCl is also shown. **b,** CA response of Pt SAC measured in 0.1 M HClO4 + 1.0 M NaCl. The potential of the Pt ring electrode is fixed at 0.95 V to enable Cl2 reduction.


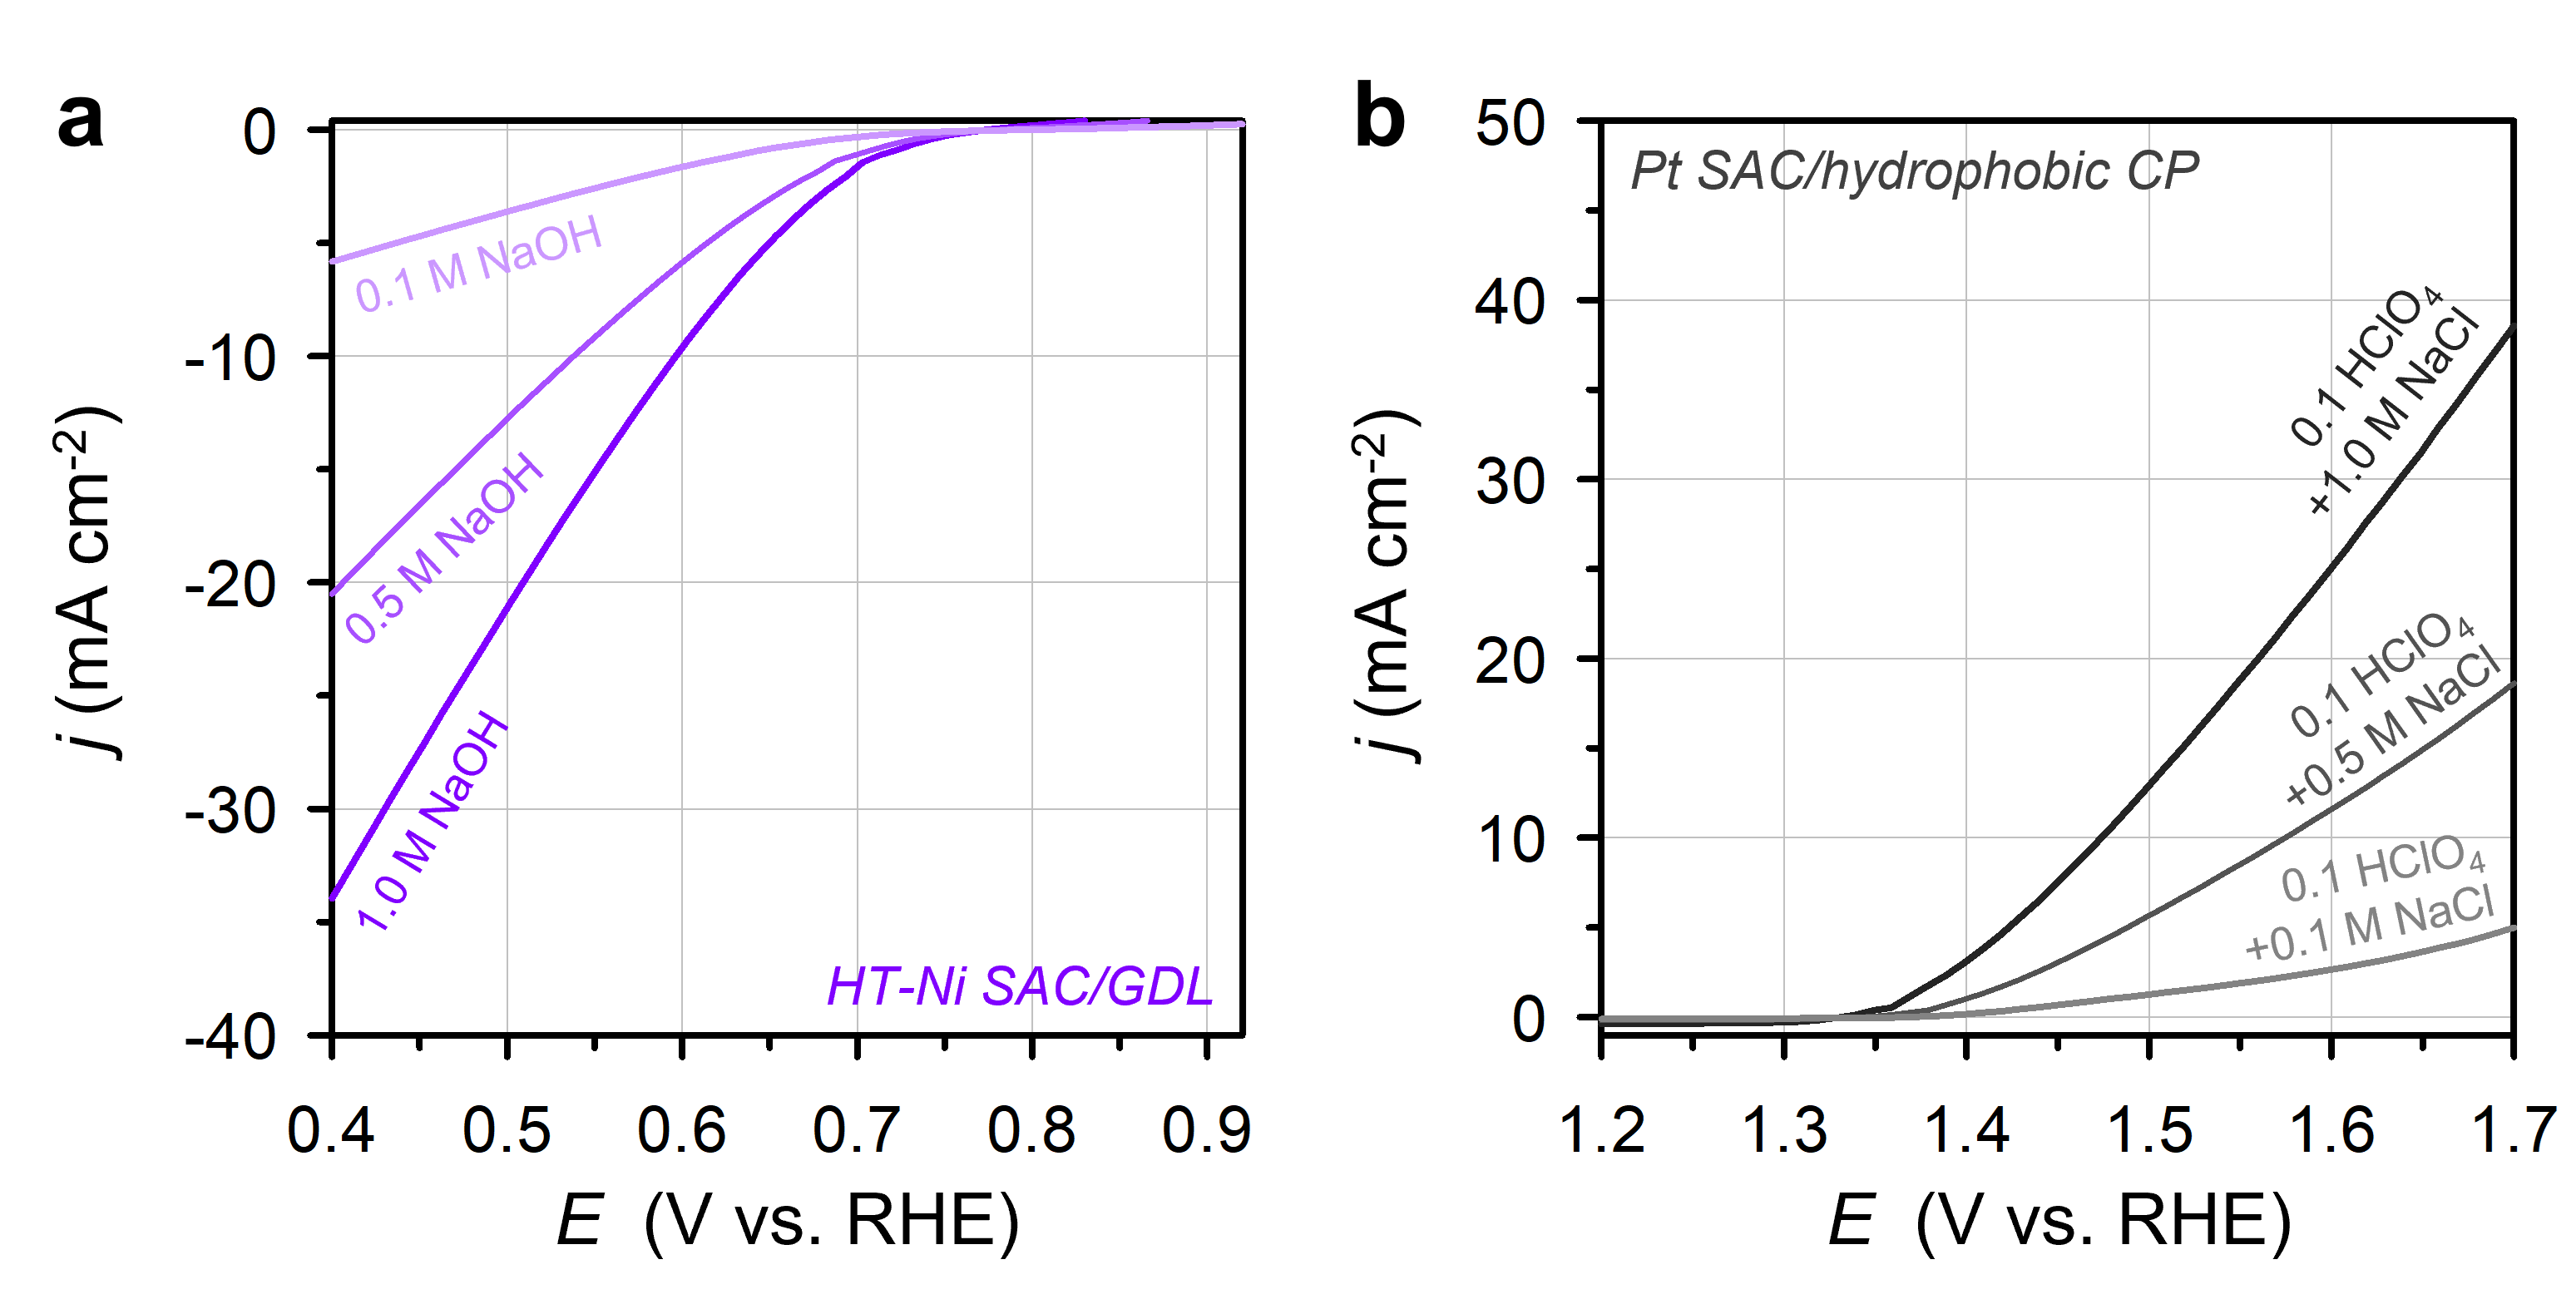


**Supplementary Fig. 19** | **a,** ORR polarization curves of HT-Ni SAC/GDL recorded in 0.1, 0.5, and 1.0 M NaOH. **b,** CER polarization curves of Pt SAC/hydrophobic CP recorded in 0.1 M HClO4 containing 0.1, 0.5, and 1.0 M NaCl.


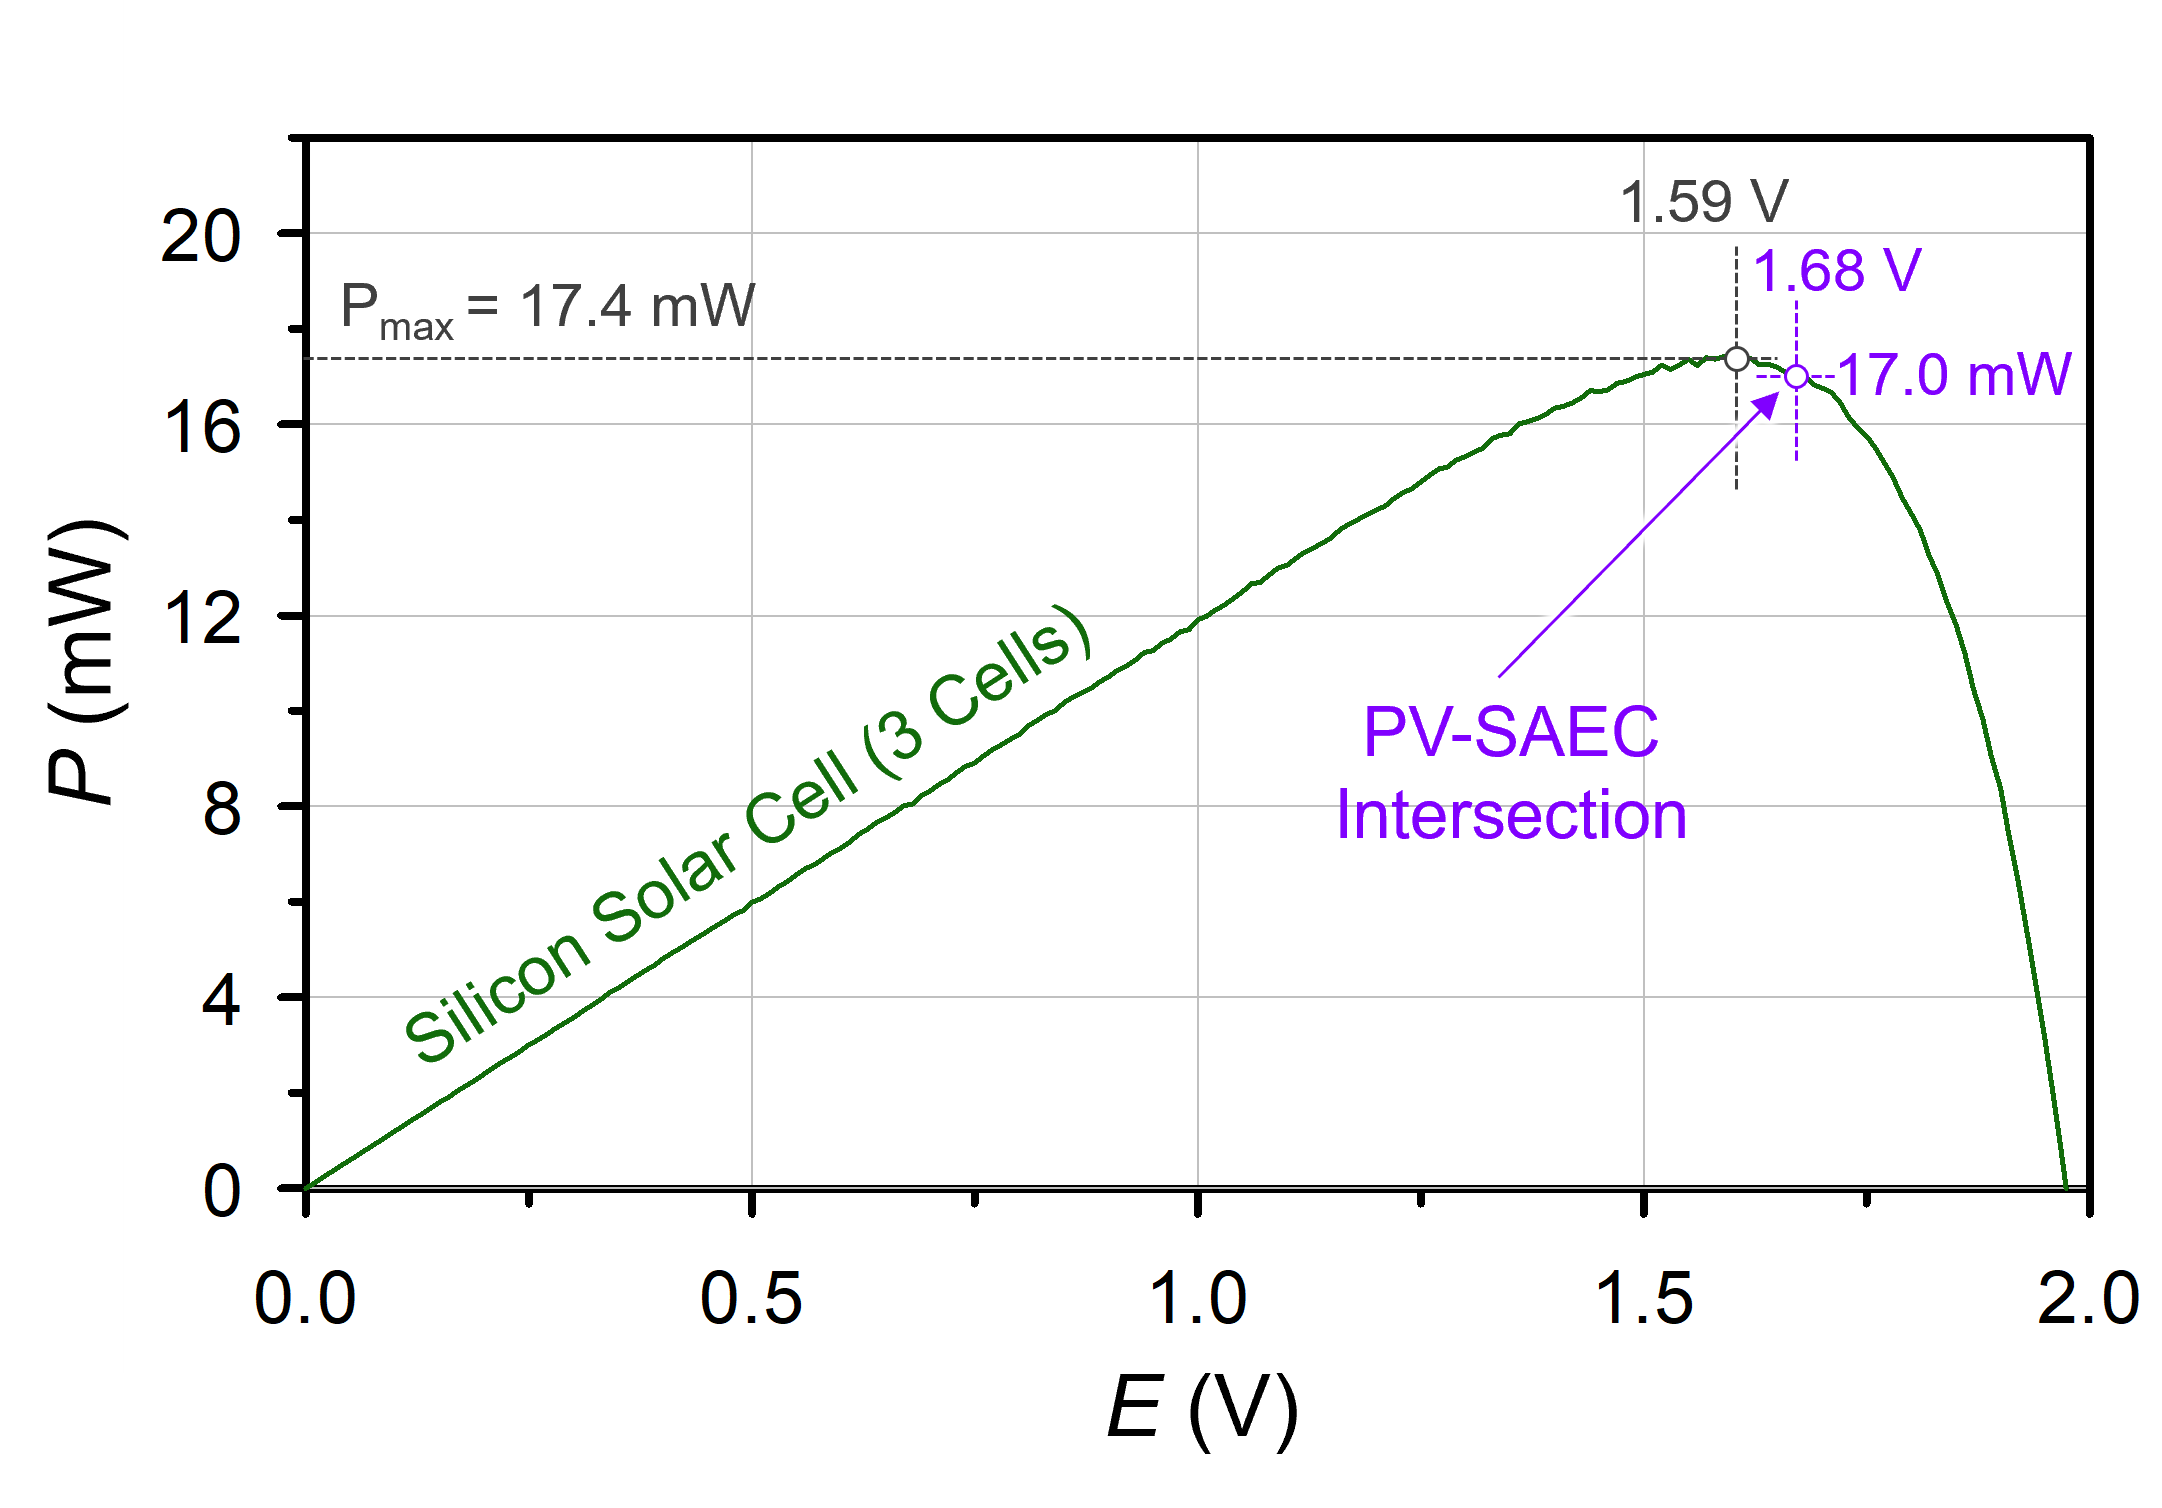


**Supplementary Fig. 20** | Power–potential curve of a silicon solar cell module consisting of three cells connected in series.


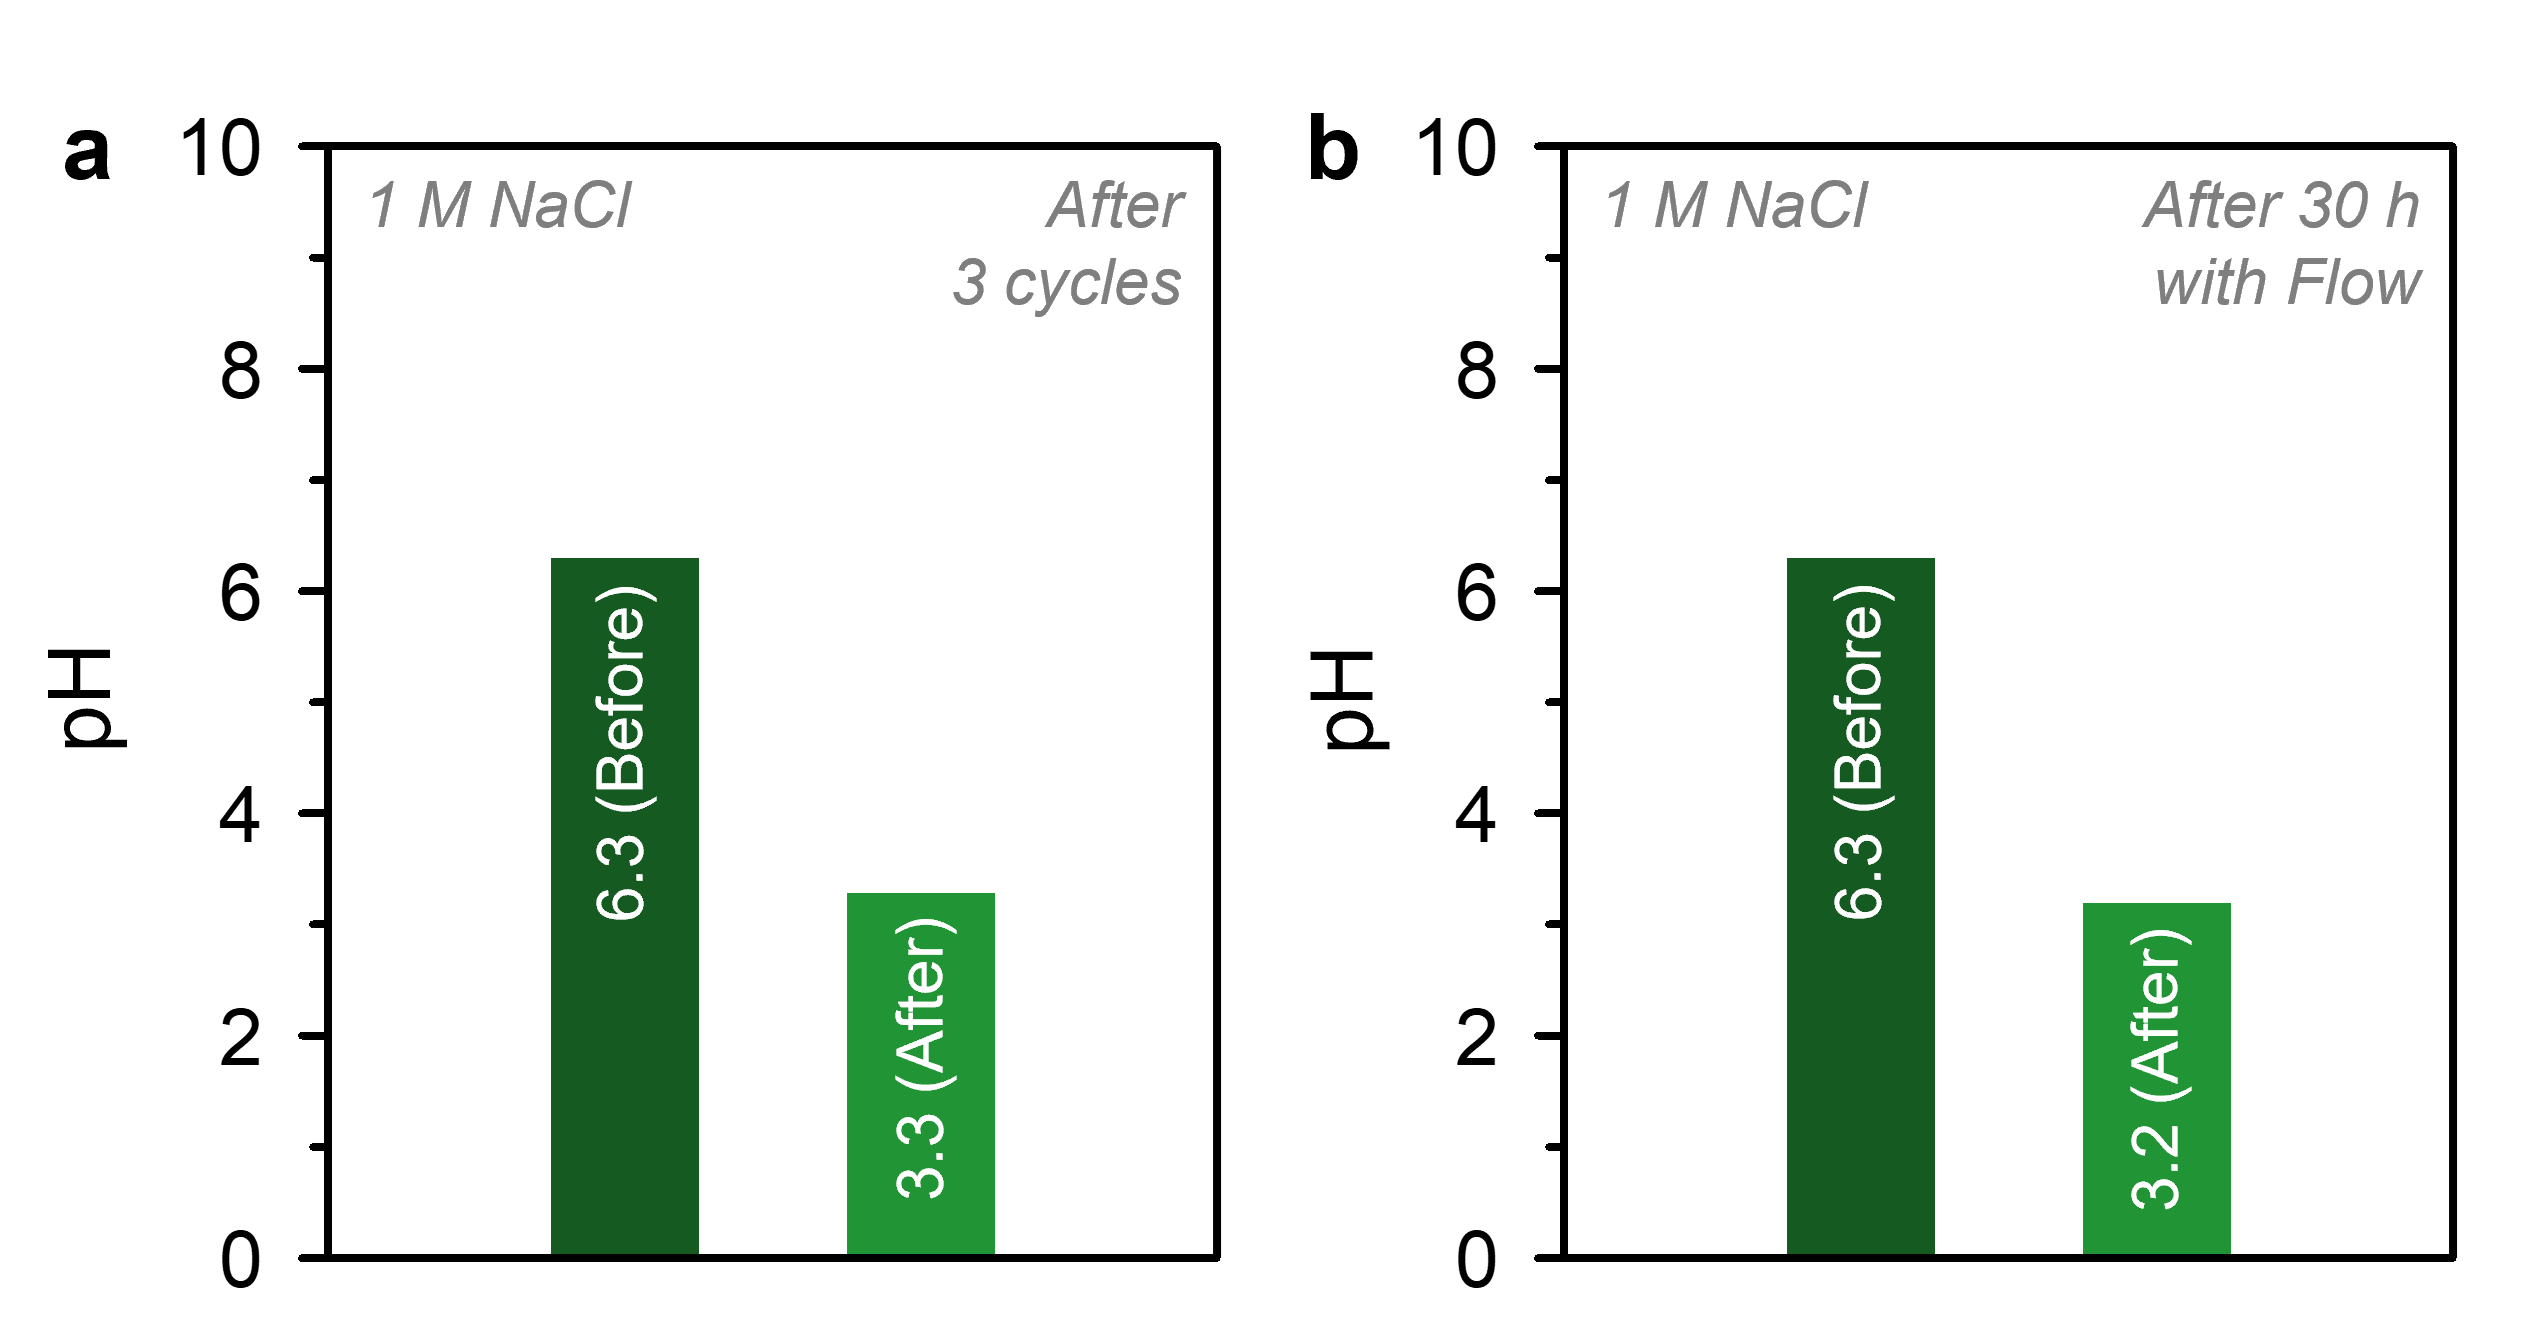


**Supplementary Fig. 21** | **a,b,** pH of the NaCl solution in the desalination compartment measured before and after three cycles of closed cell operation (**a**) and after 30 h of flow cell operation (**b**).


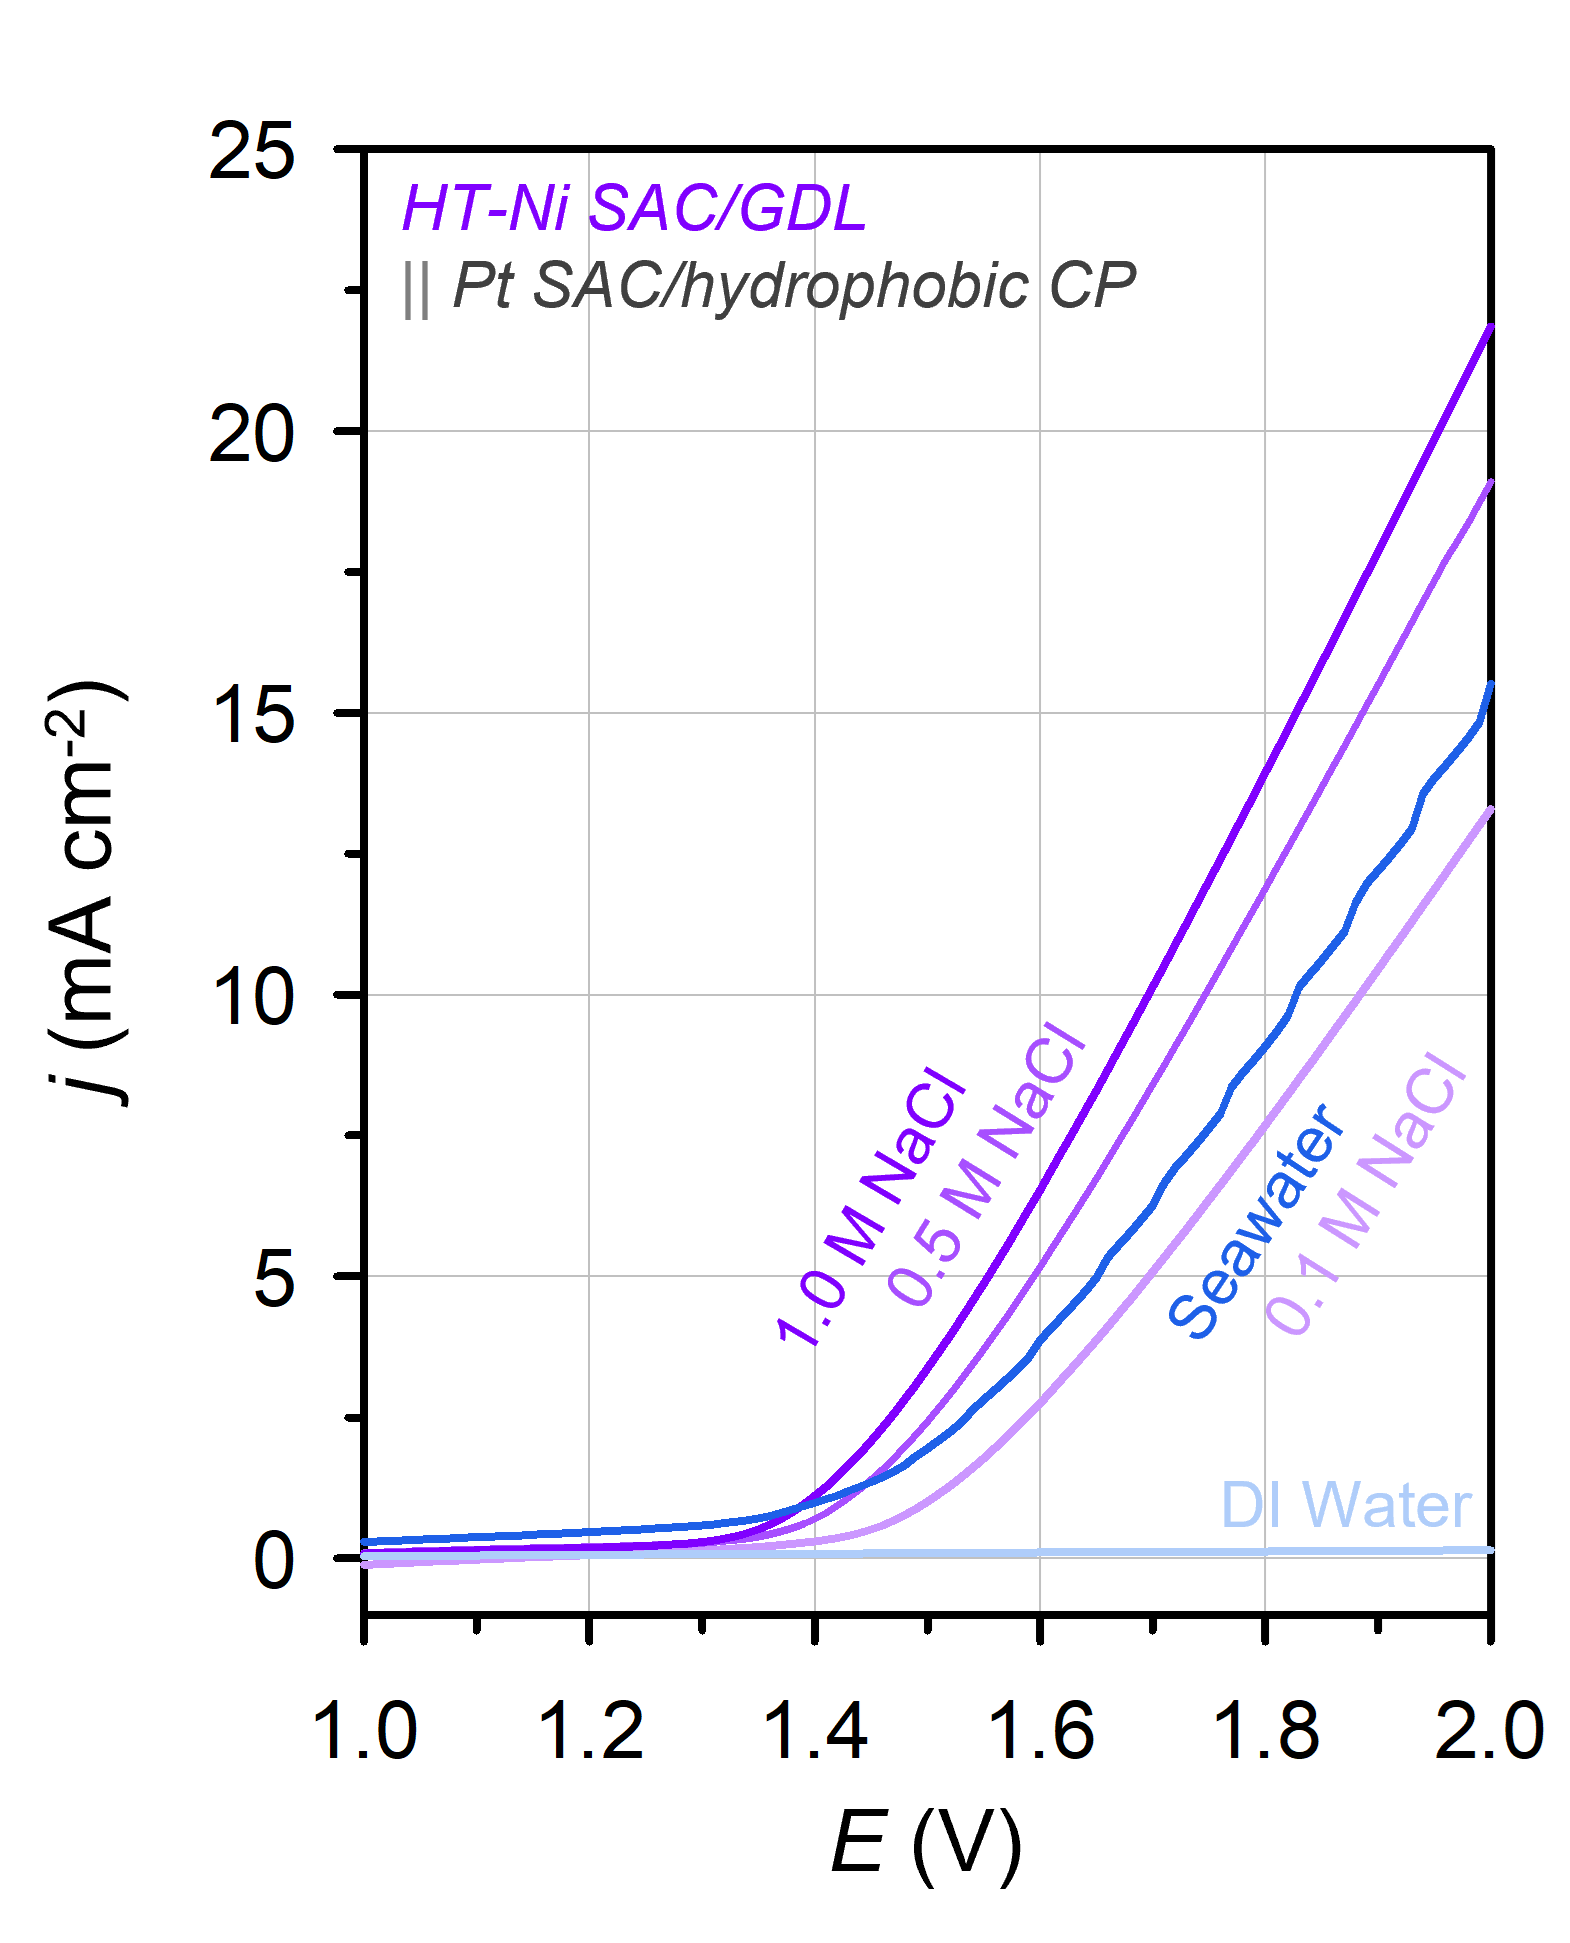


**Supplementary Fig. 22** | Polarization curves of two-electrode SAEC (HT-Ni SAC/GDL || Pt SAC/hydrophobic CP) recorded in DI water, seawater, and aqueous NaCl solutions with concentrations of 0.1, 0.5, and 1.0 M.


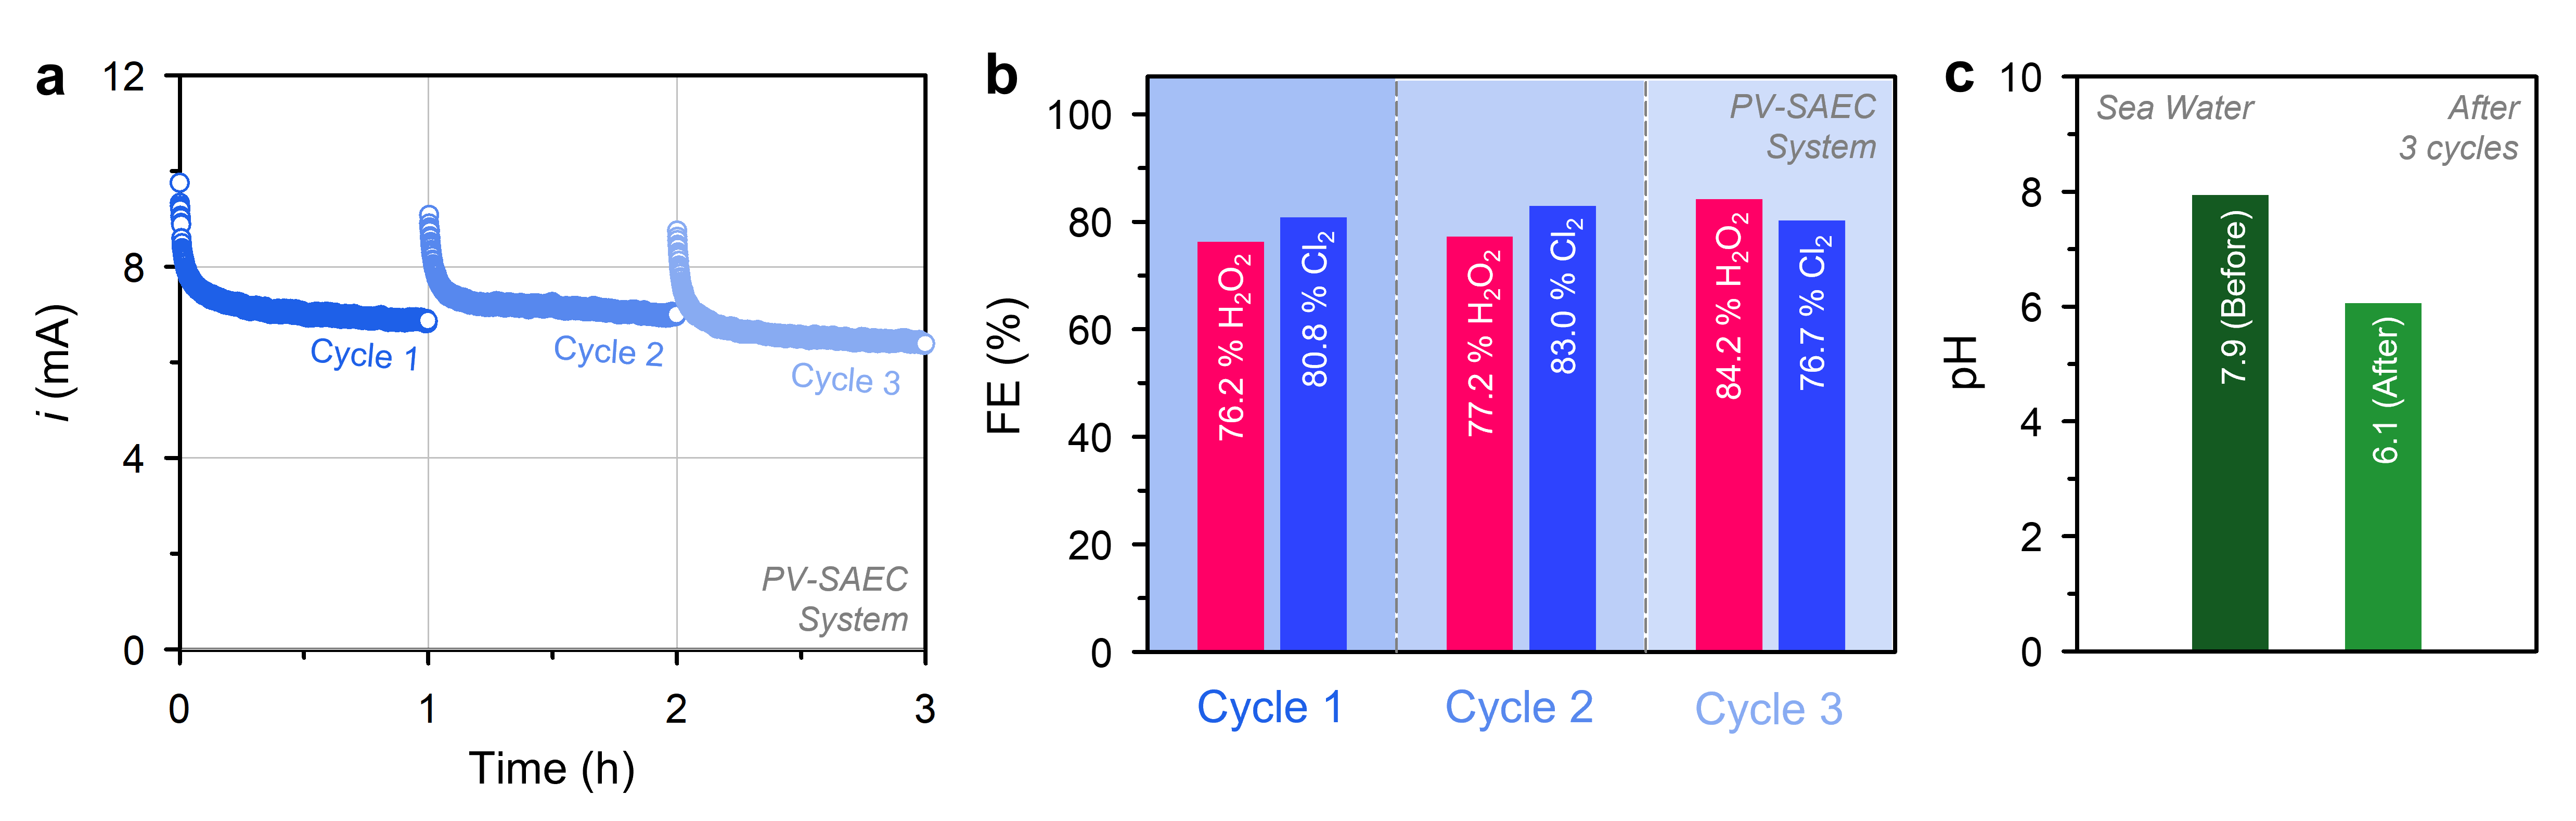


**Supplementary Fig. 23** | **a,** CA response of the PV-SAEC system operated in a closed configuration under bias-free conditions (0 V) over three consecutive 1-h cycles. **b,** FEs for H2O2 and Cl2 during each electrolysis cycle. **c,** pH of the NaCl solution in desalination compartment before and after three cycles.


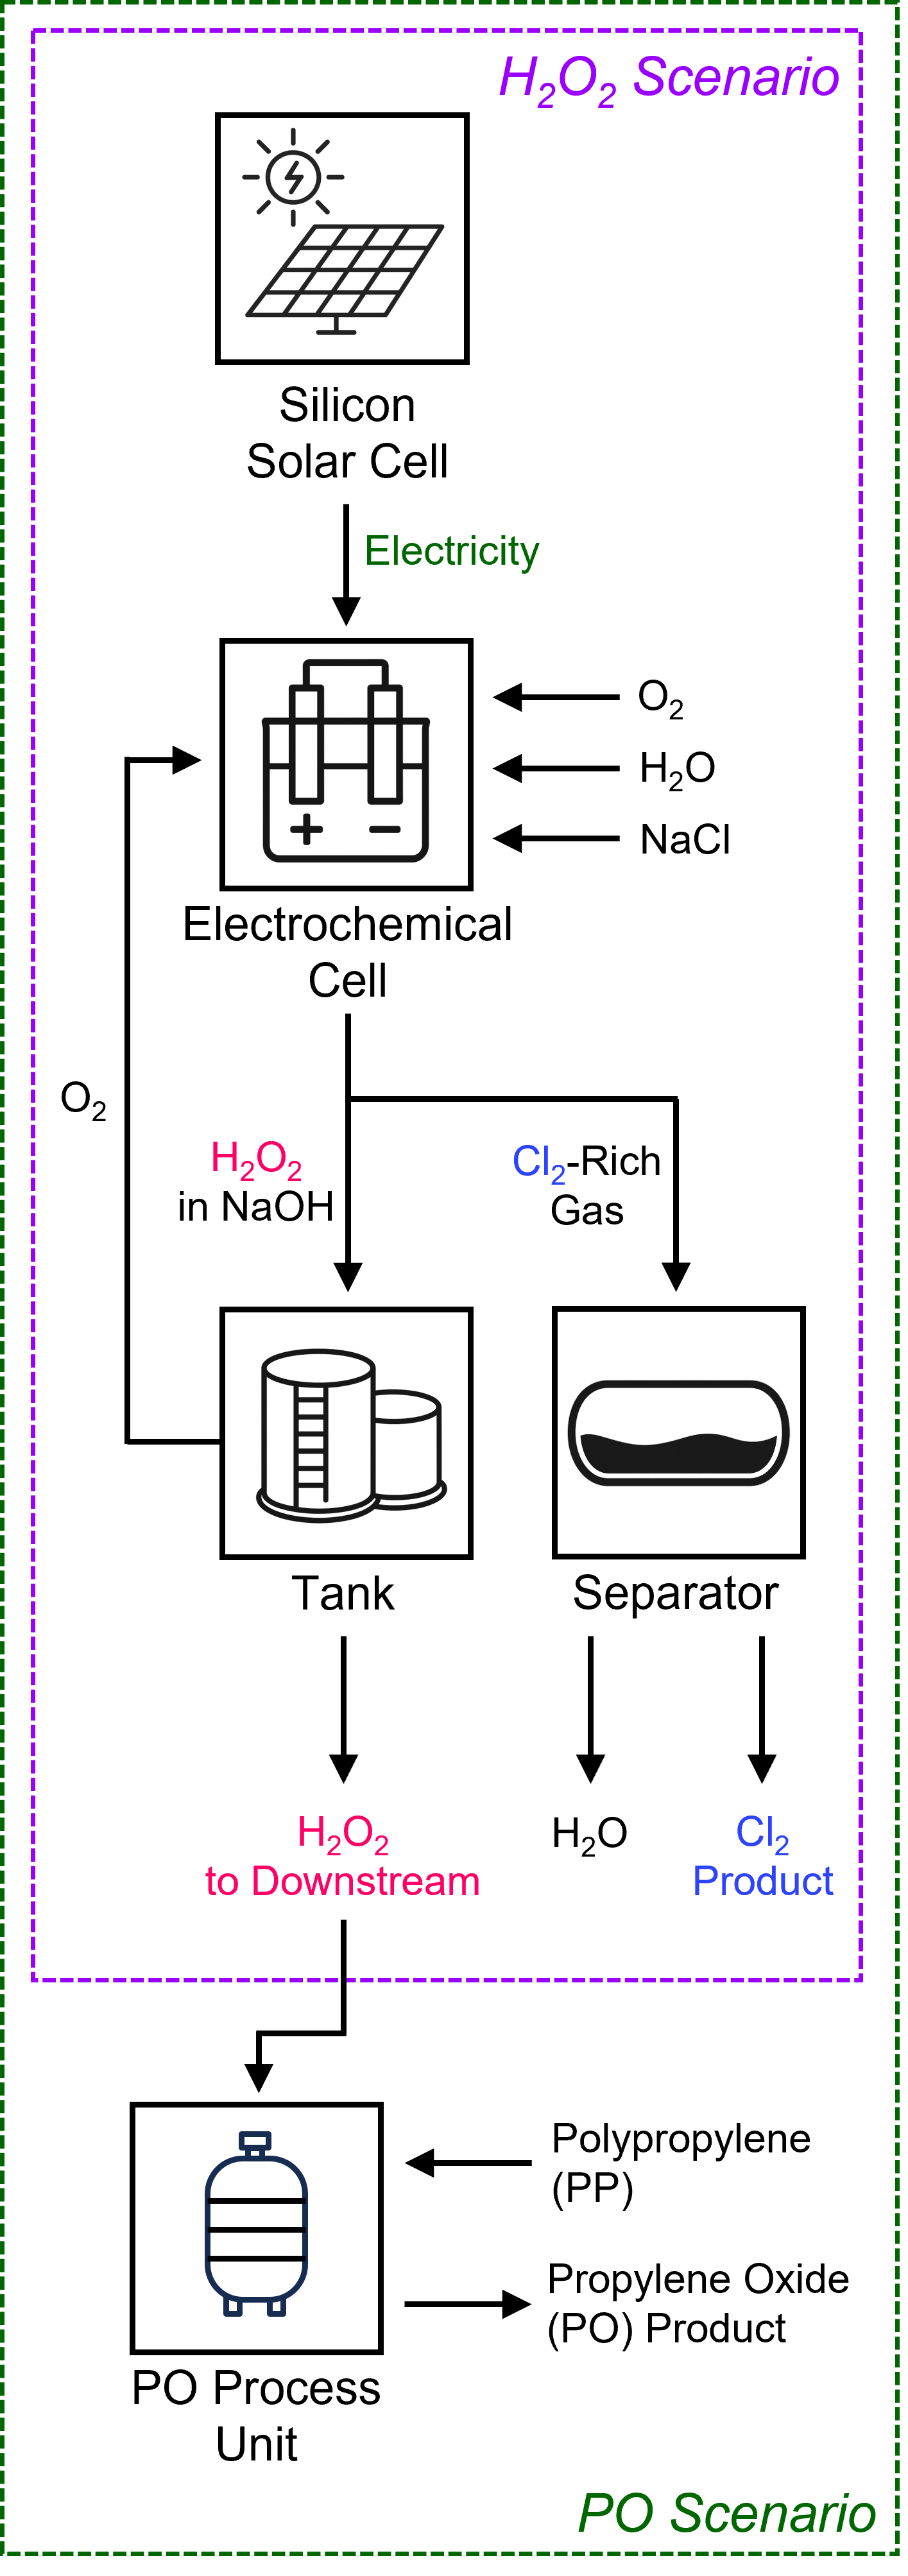


**Supplementary Fig. 24** | TEA–LCA system boundaries of the H2O2 (purple) and PO (green) scenarios.


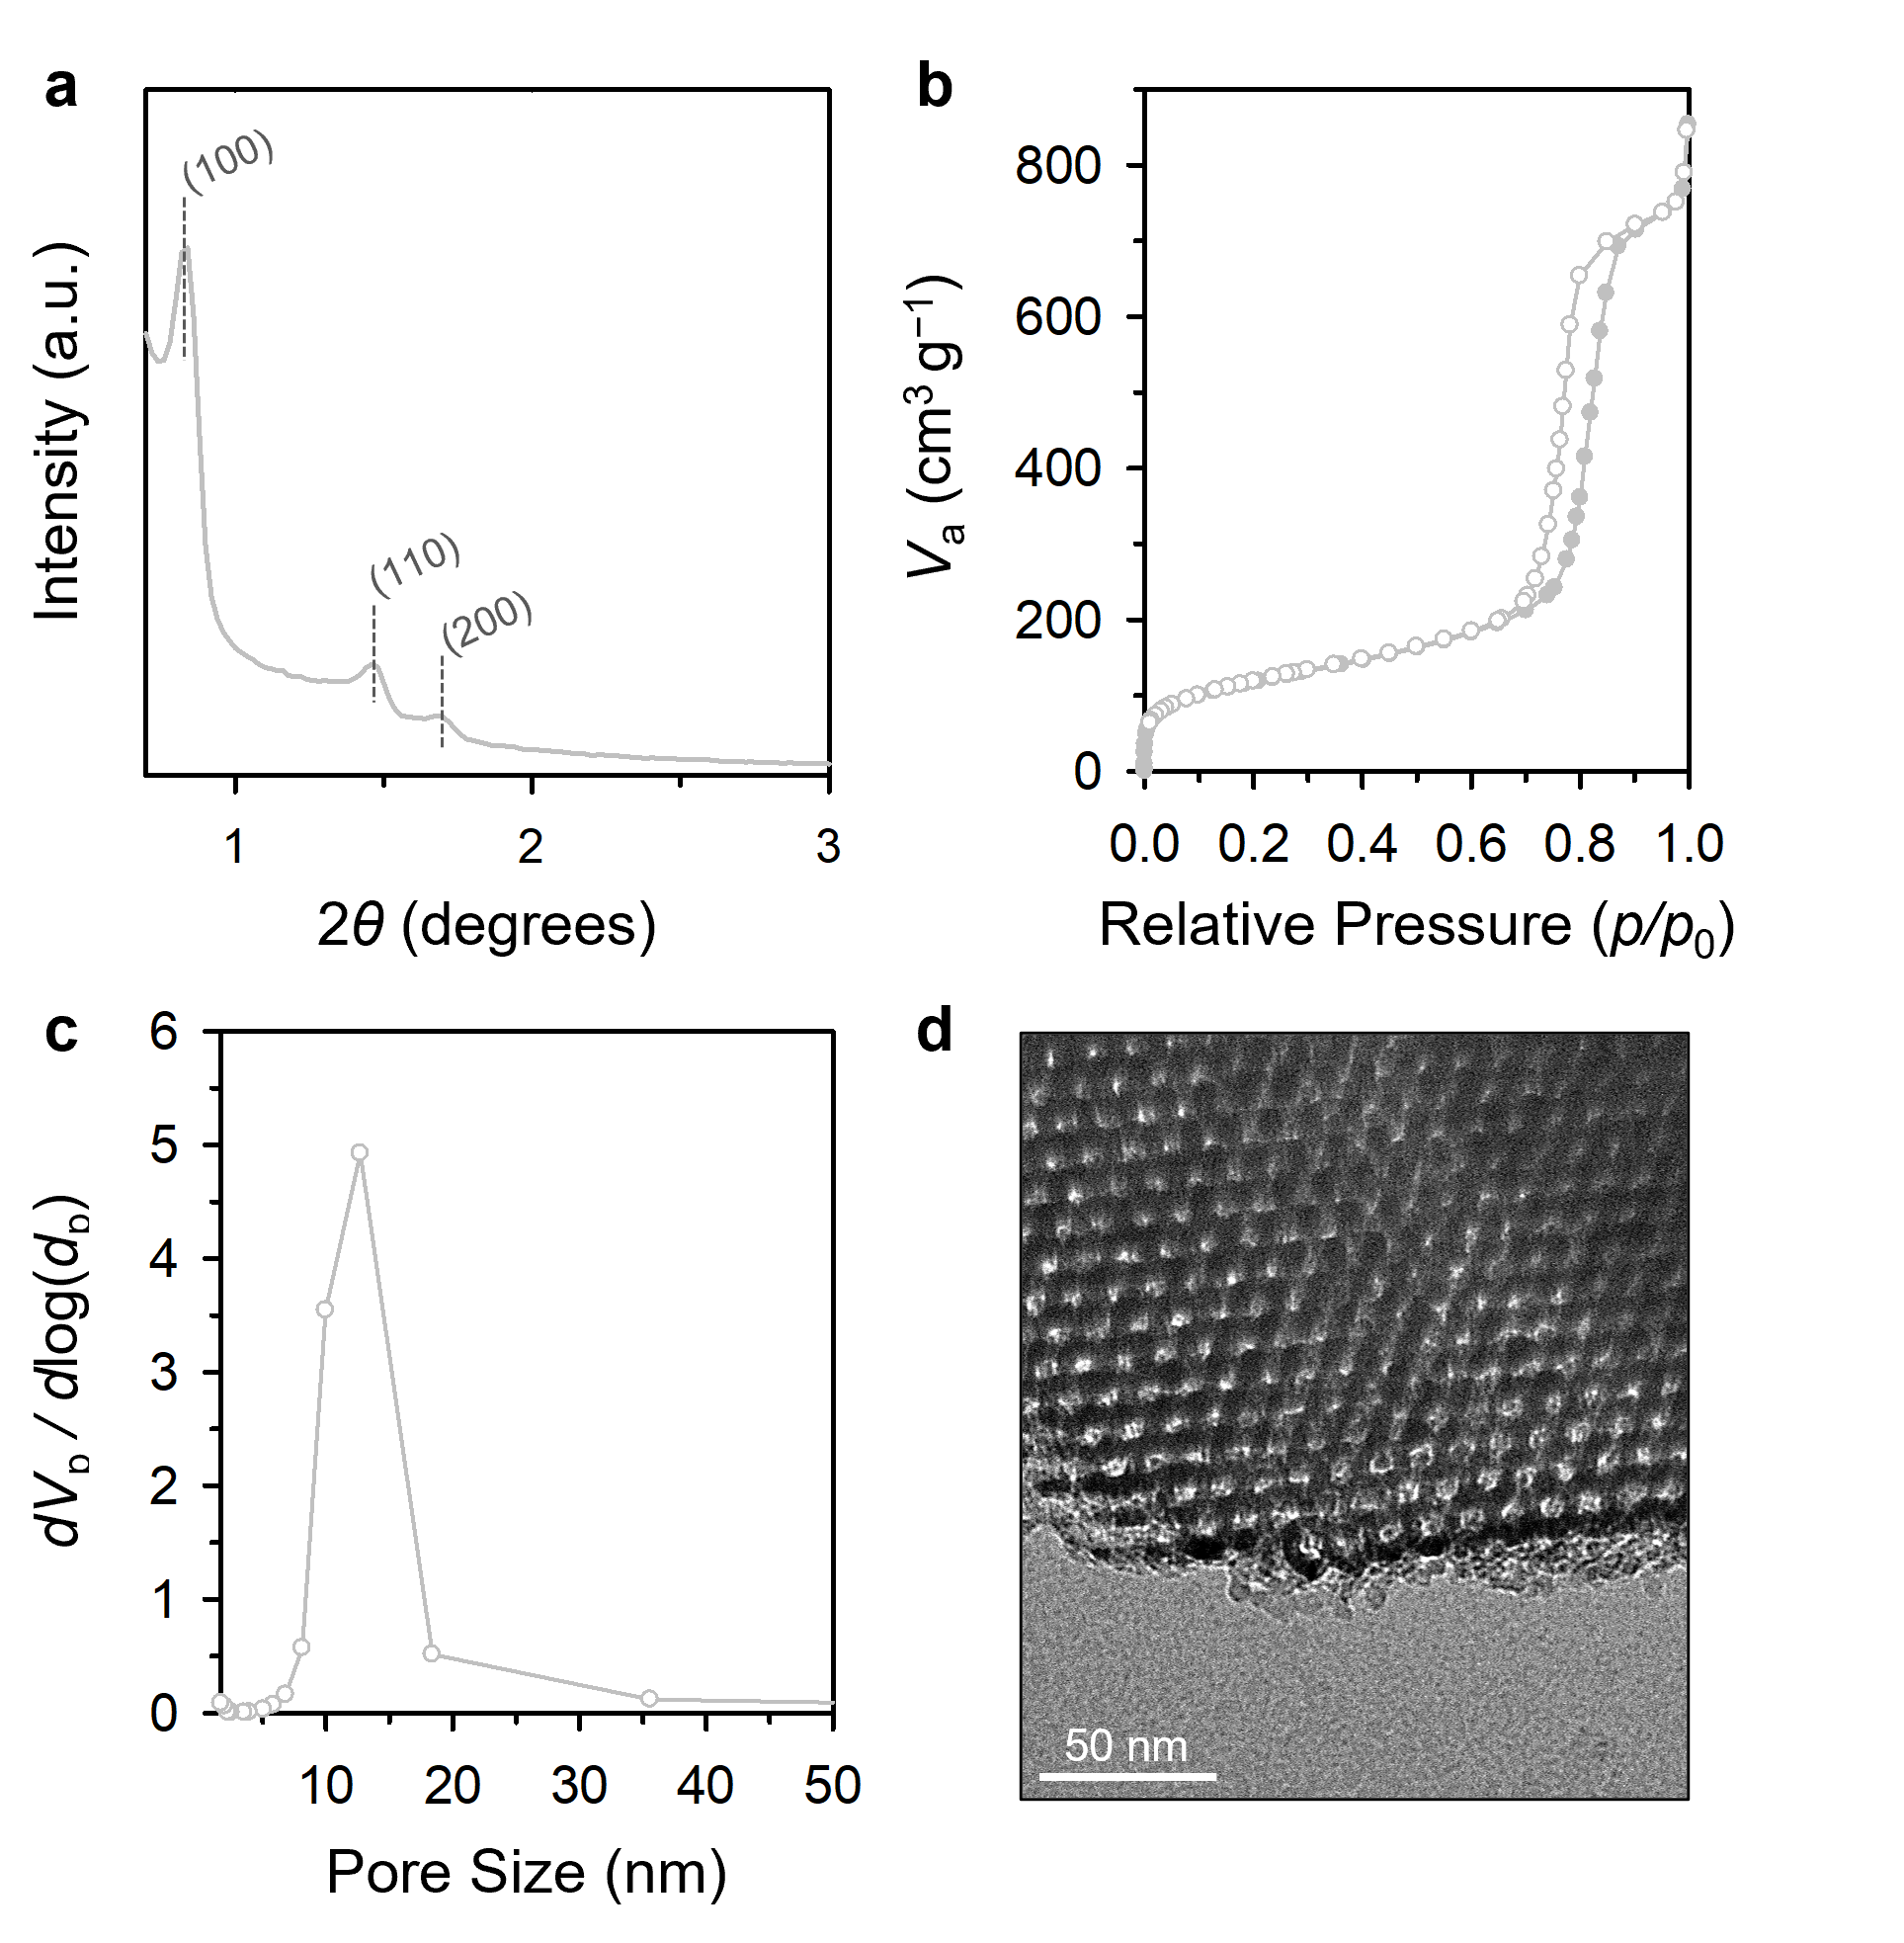


**Supplementary Fig. 25** | **a–d,** Small-angle XRD pattern (**a**), N2 adsorption–desorption isotherm (**b**), BJH pore size distribution curve obtained from the adsorption branch (**c**), and BF-STEM image (**d**) of SBA-15.


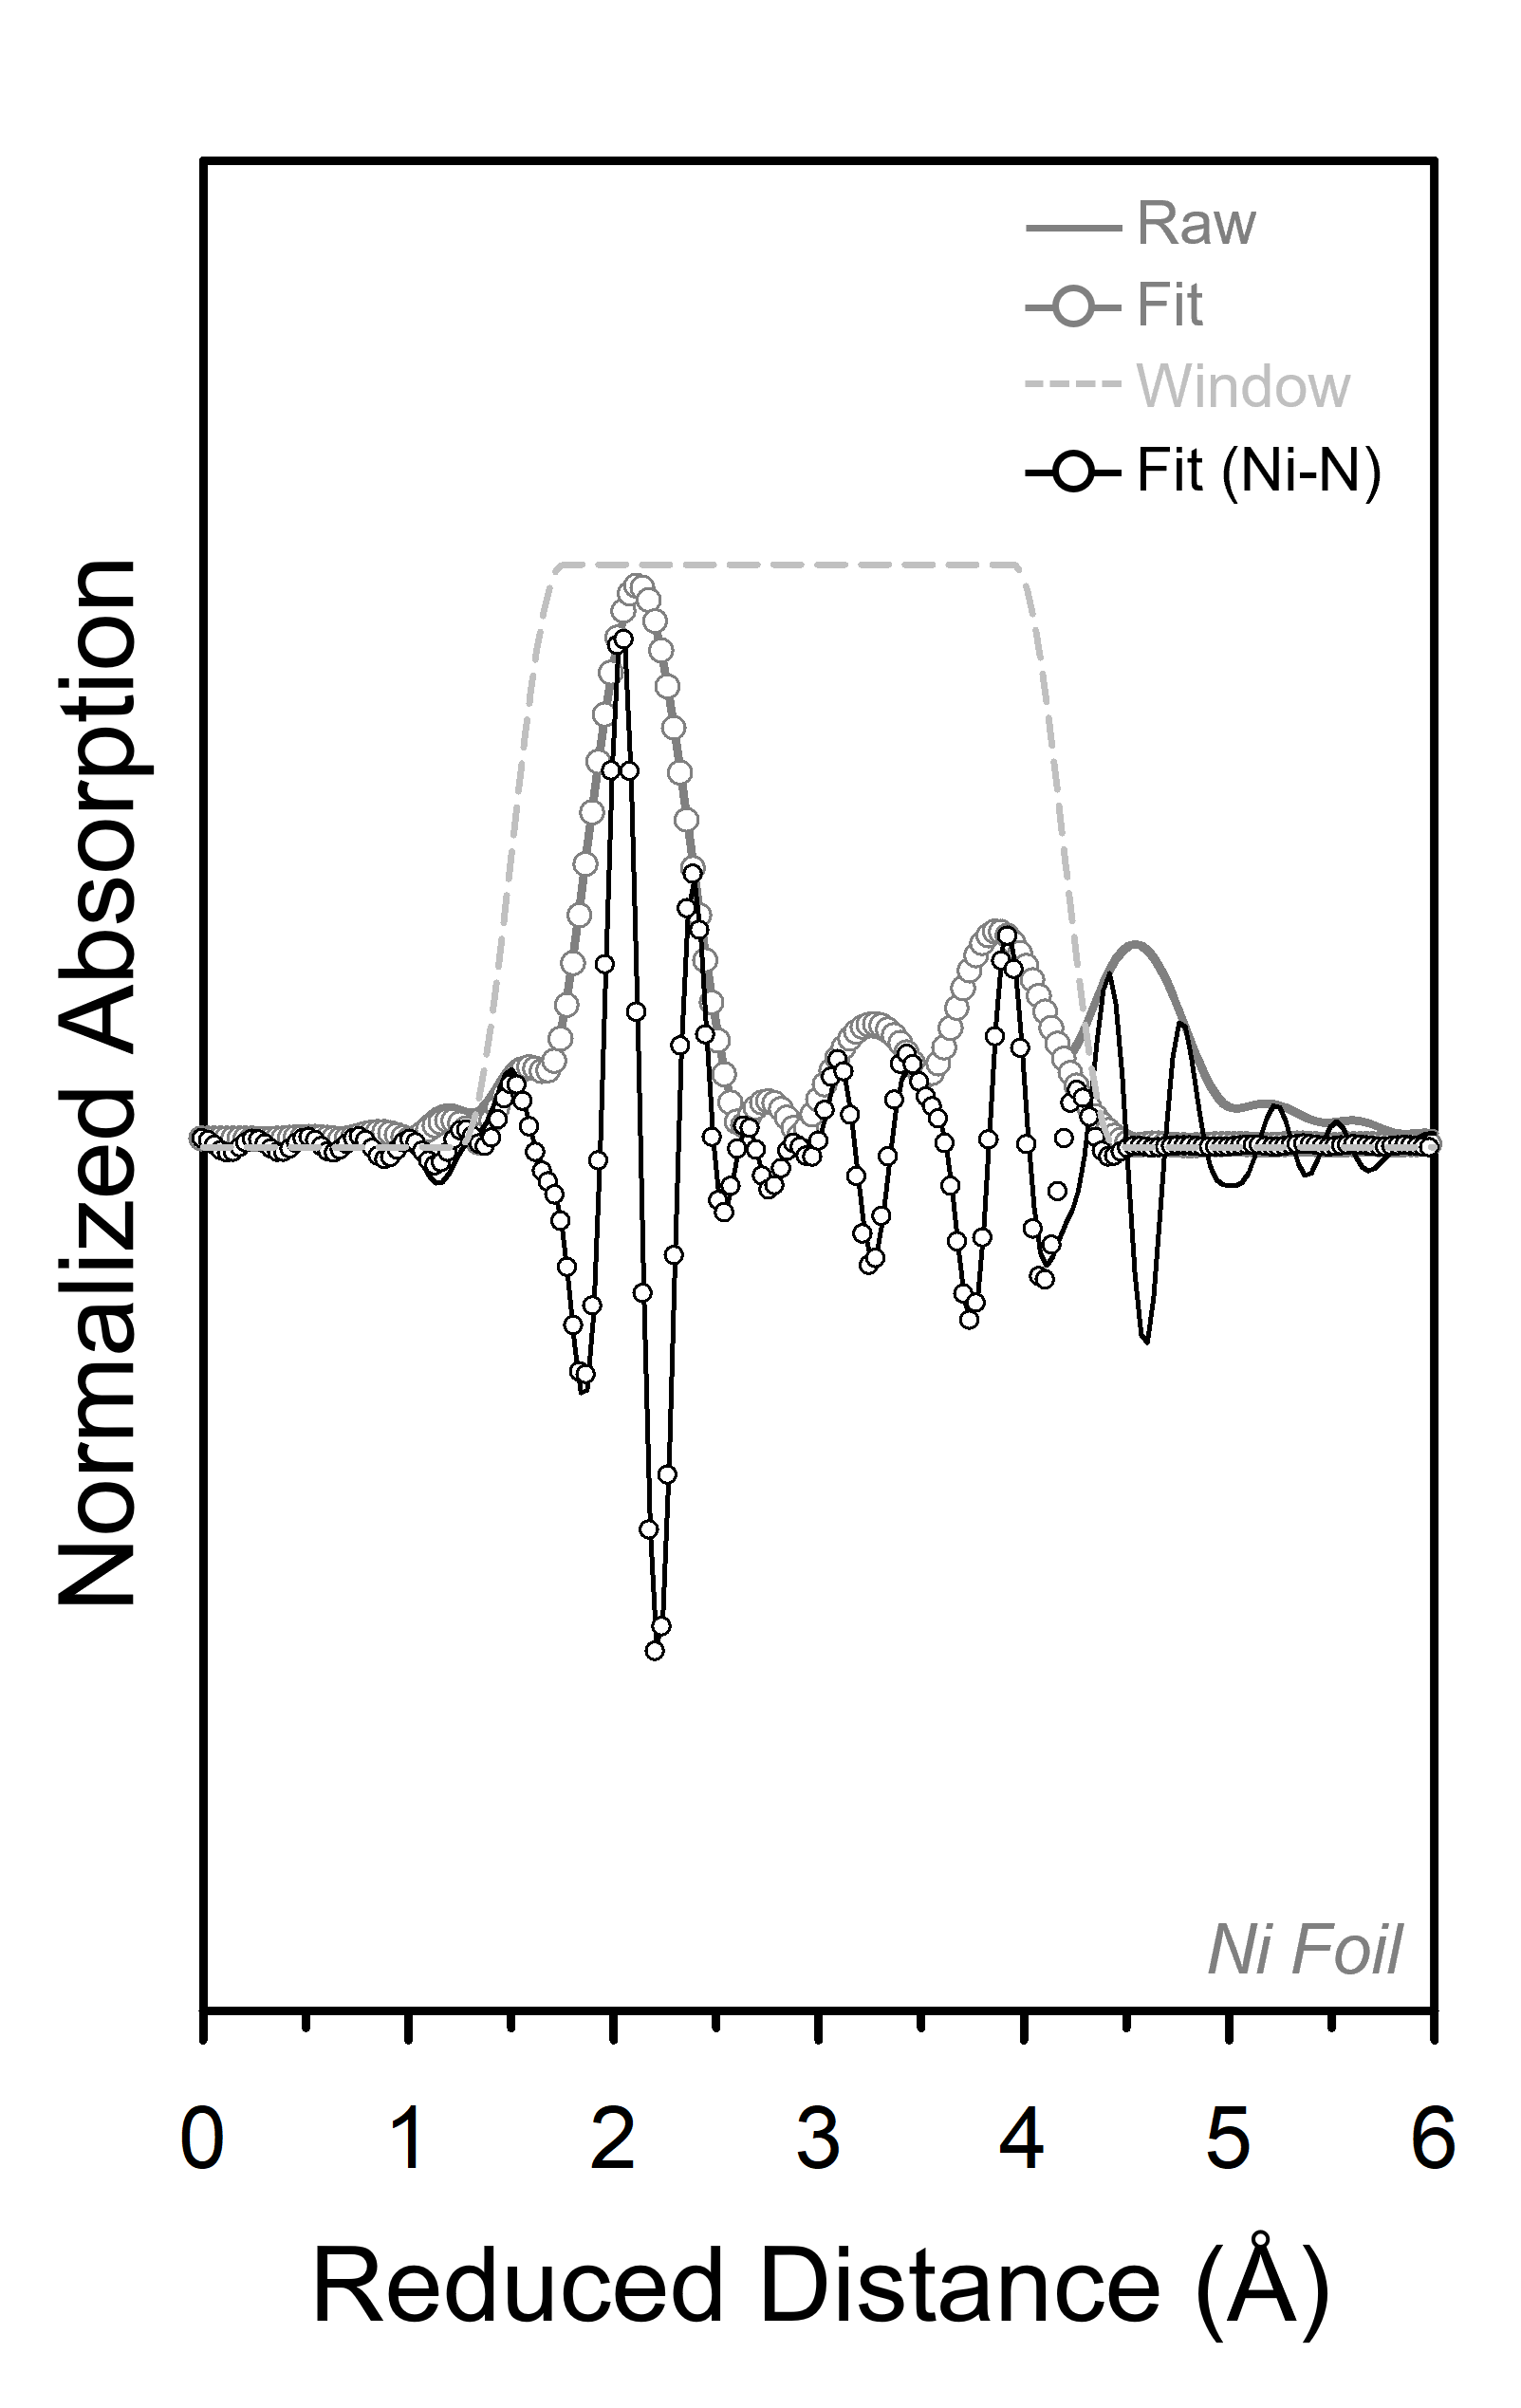


**Supplementary Fig. 26** | EXAFS fitting results in *R* space for Ni foil.


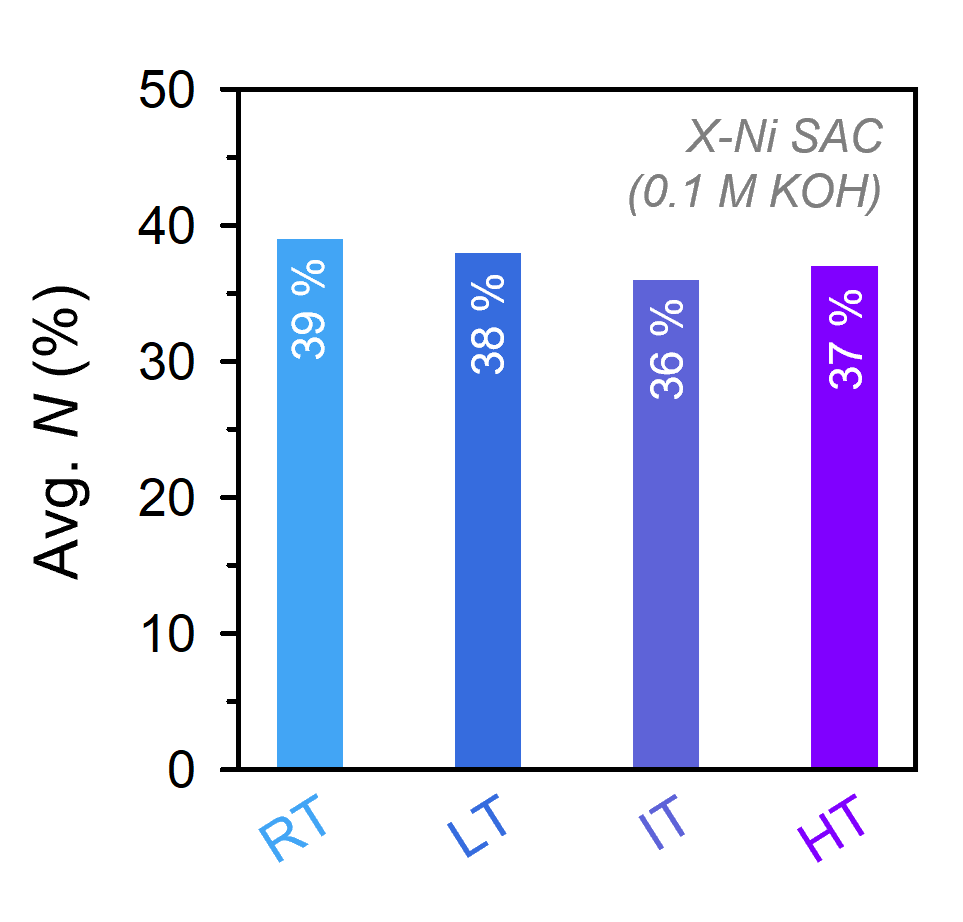


**Supplementary Fig. 27** | Collection efficiency of *X*-Ni SACs measured in 0.1 M KOH.


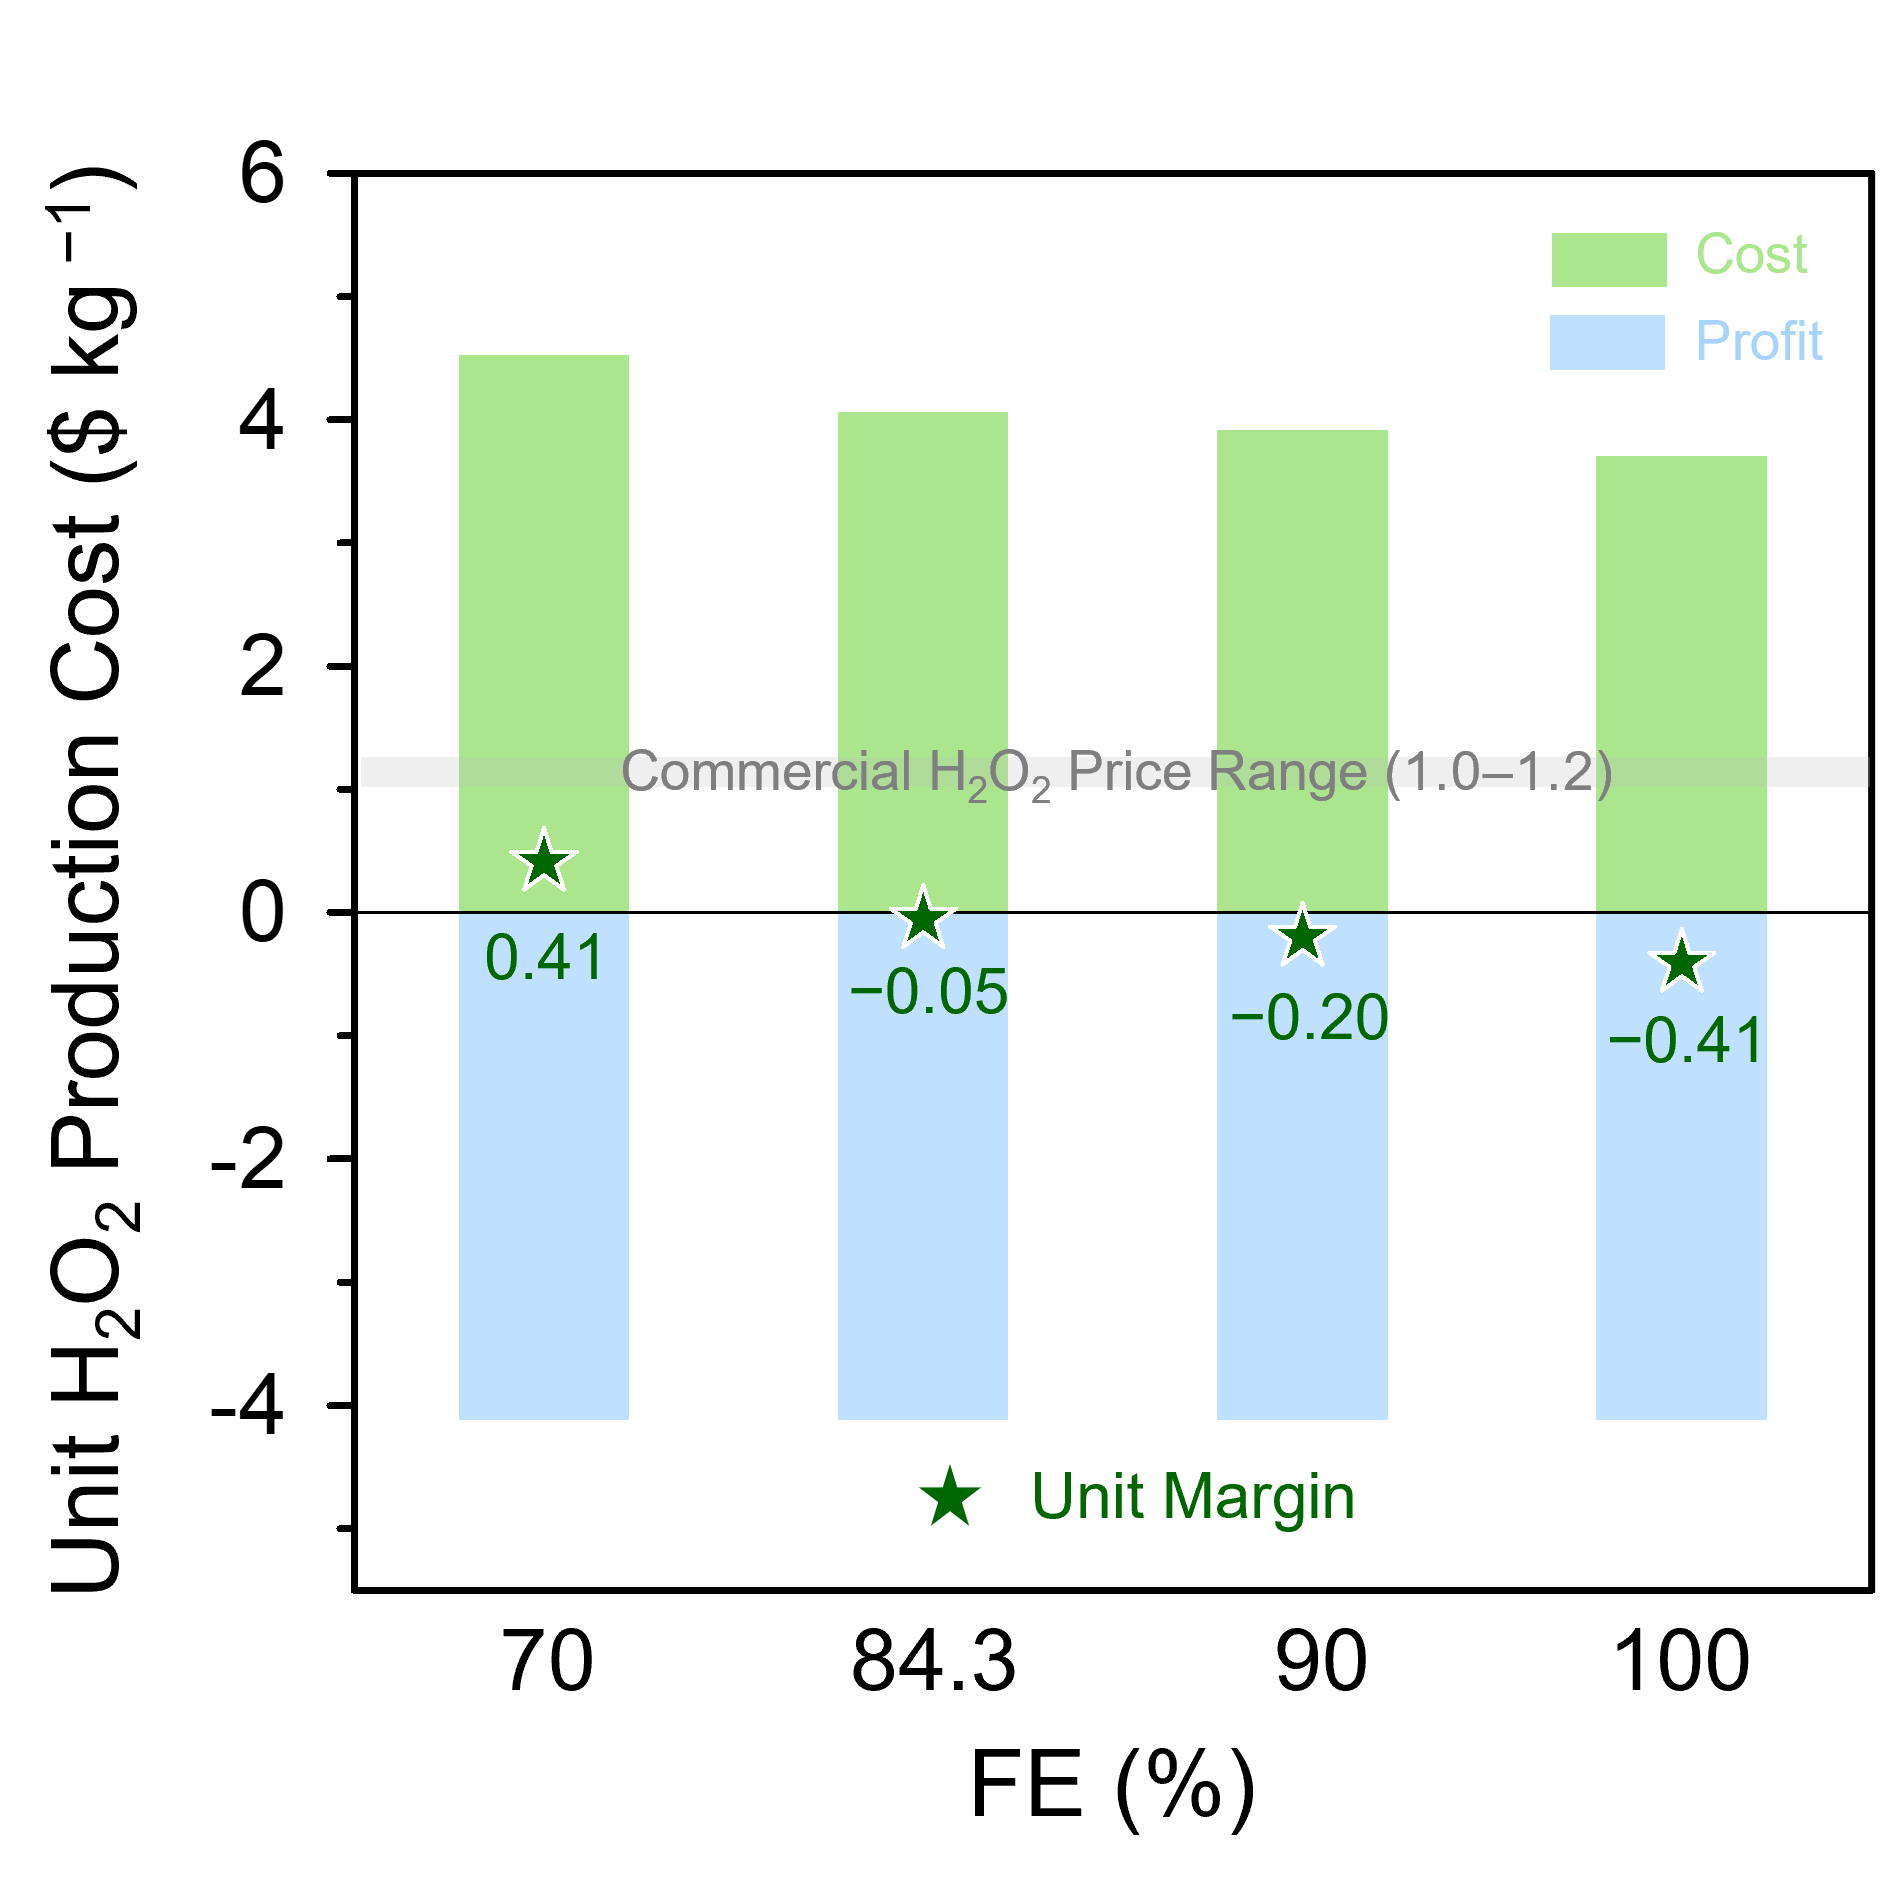


**Supplementary Fig. 28** | Sensitivity of the levelized H2O2 production cost and profitability as a function of FE under the PO scenario.


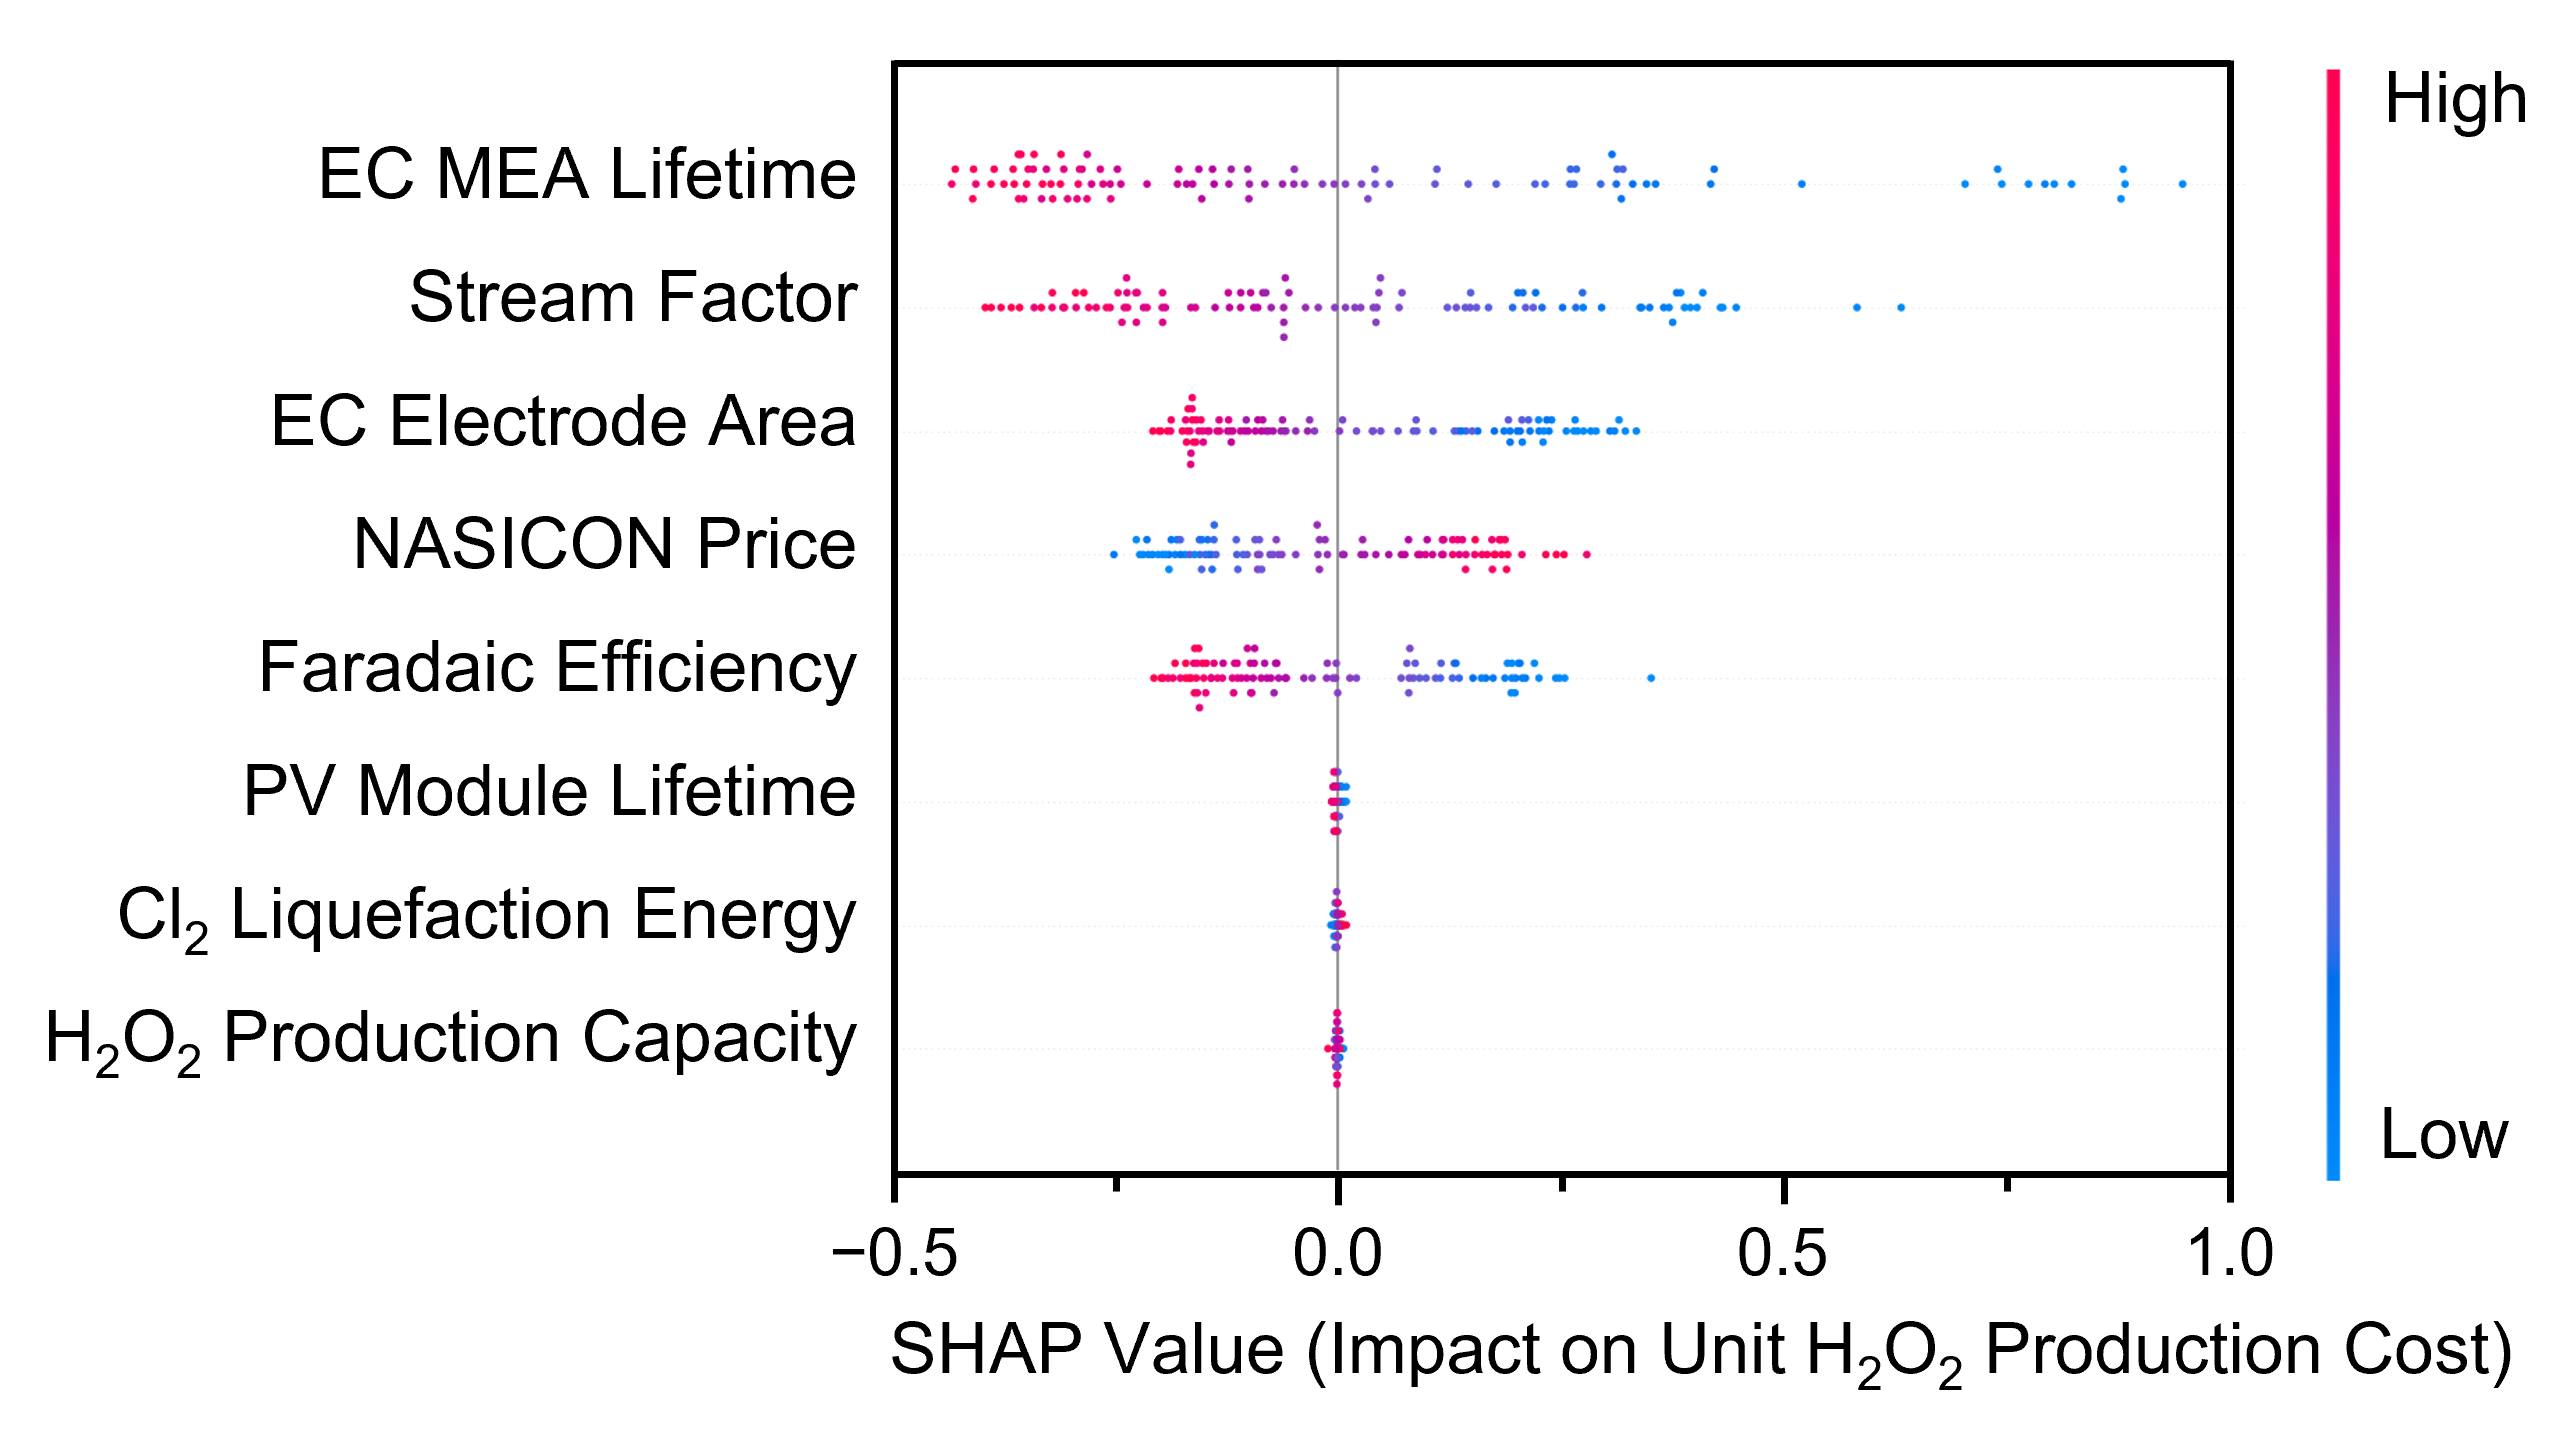


**Supplementary Fig. 29** | SHAP analysis of the unit H­2O2 production cost.


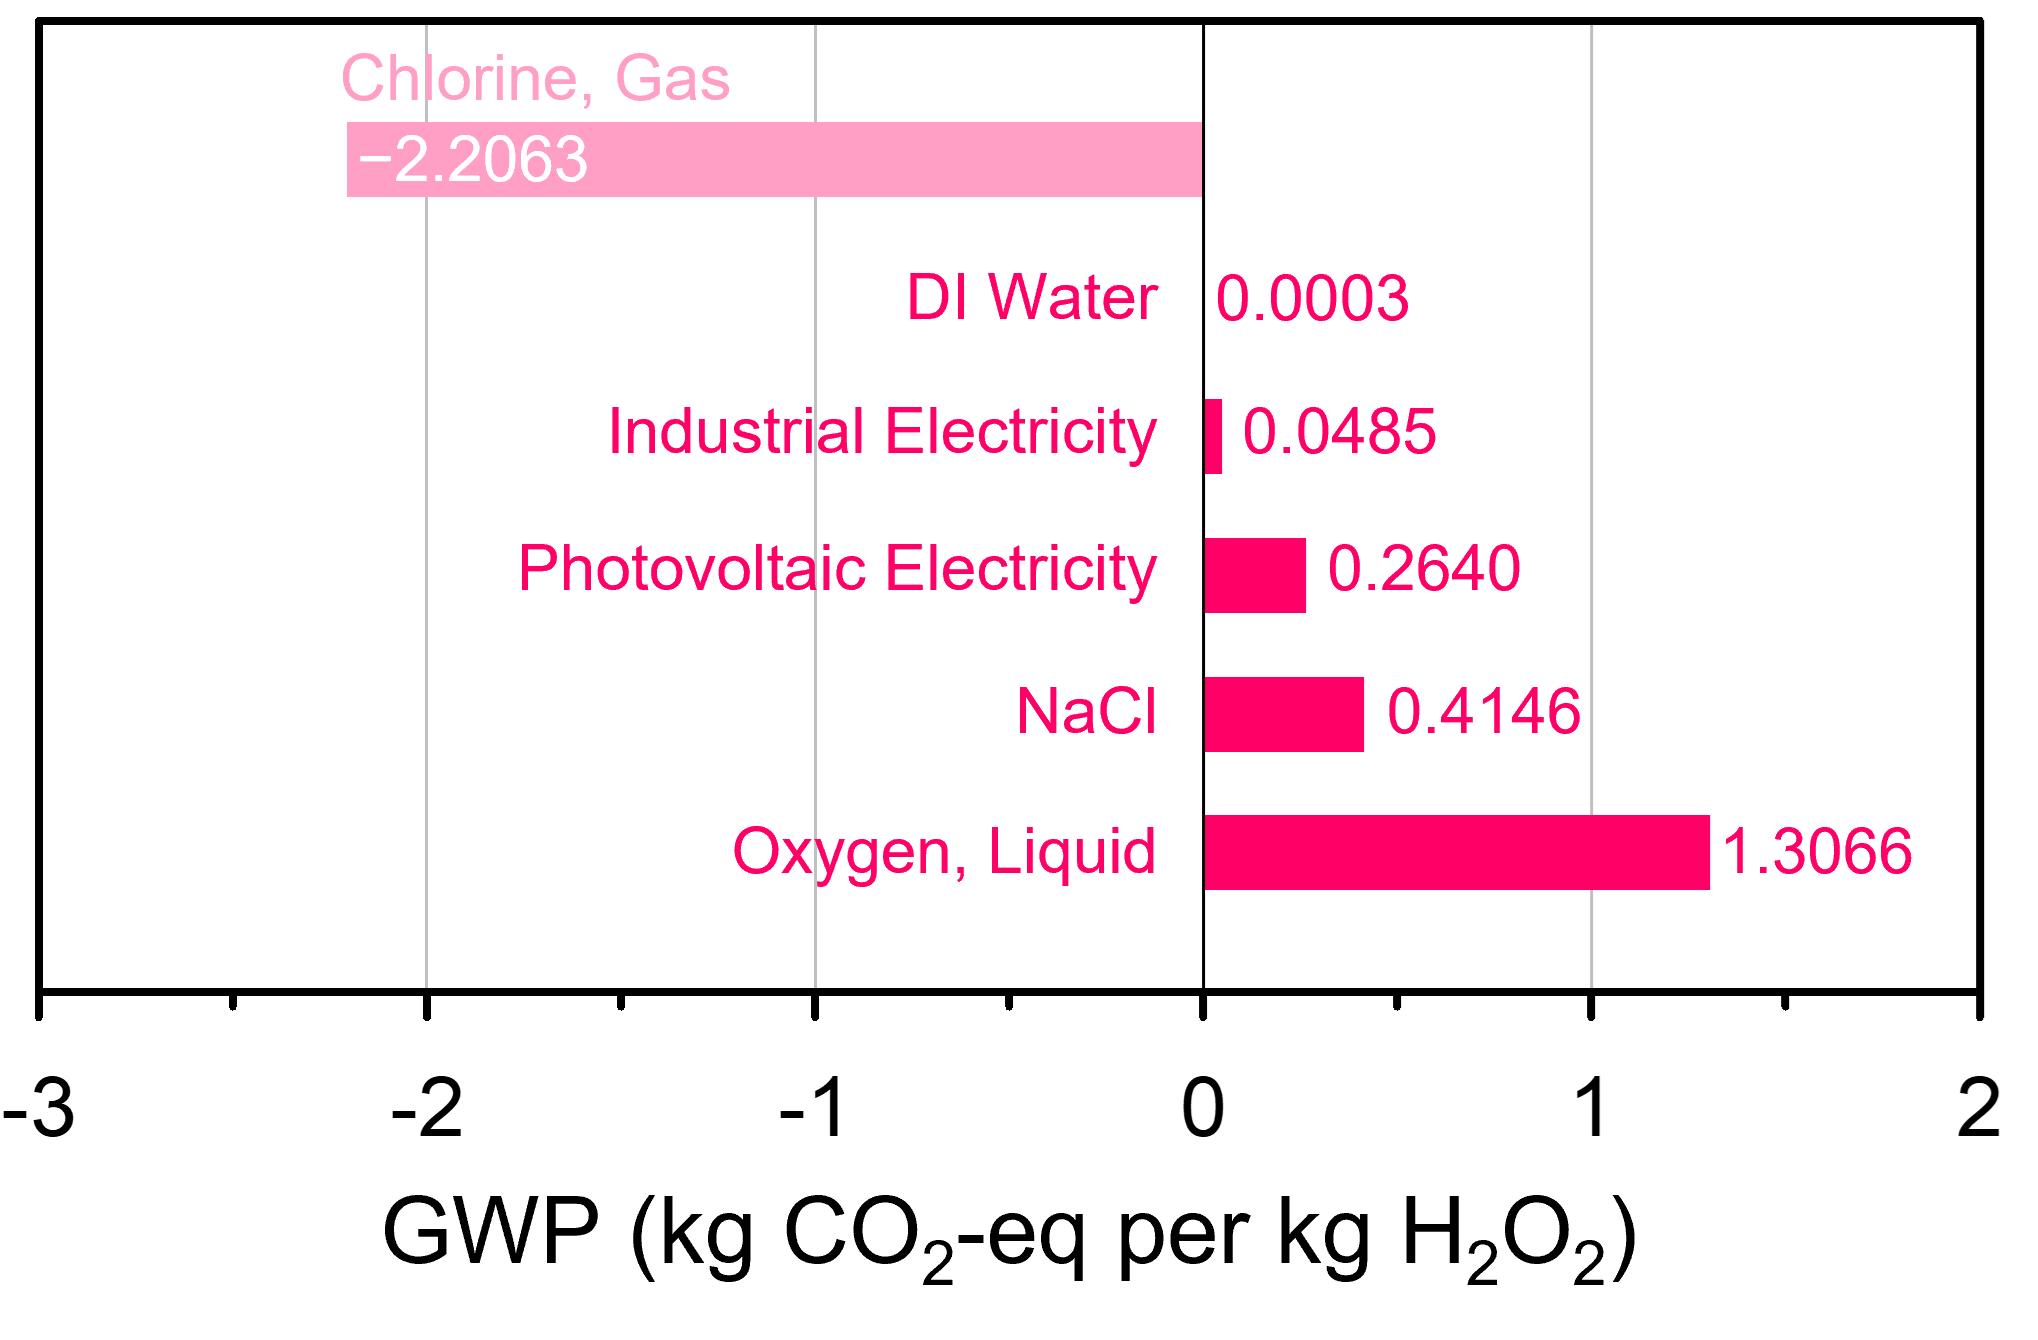


**Supplementary Fig. 30** | Breakdown of the life-cycle GWP of H­2O2 production of the PV-SAEC system.


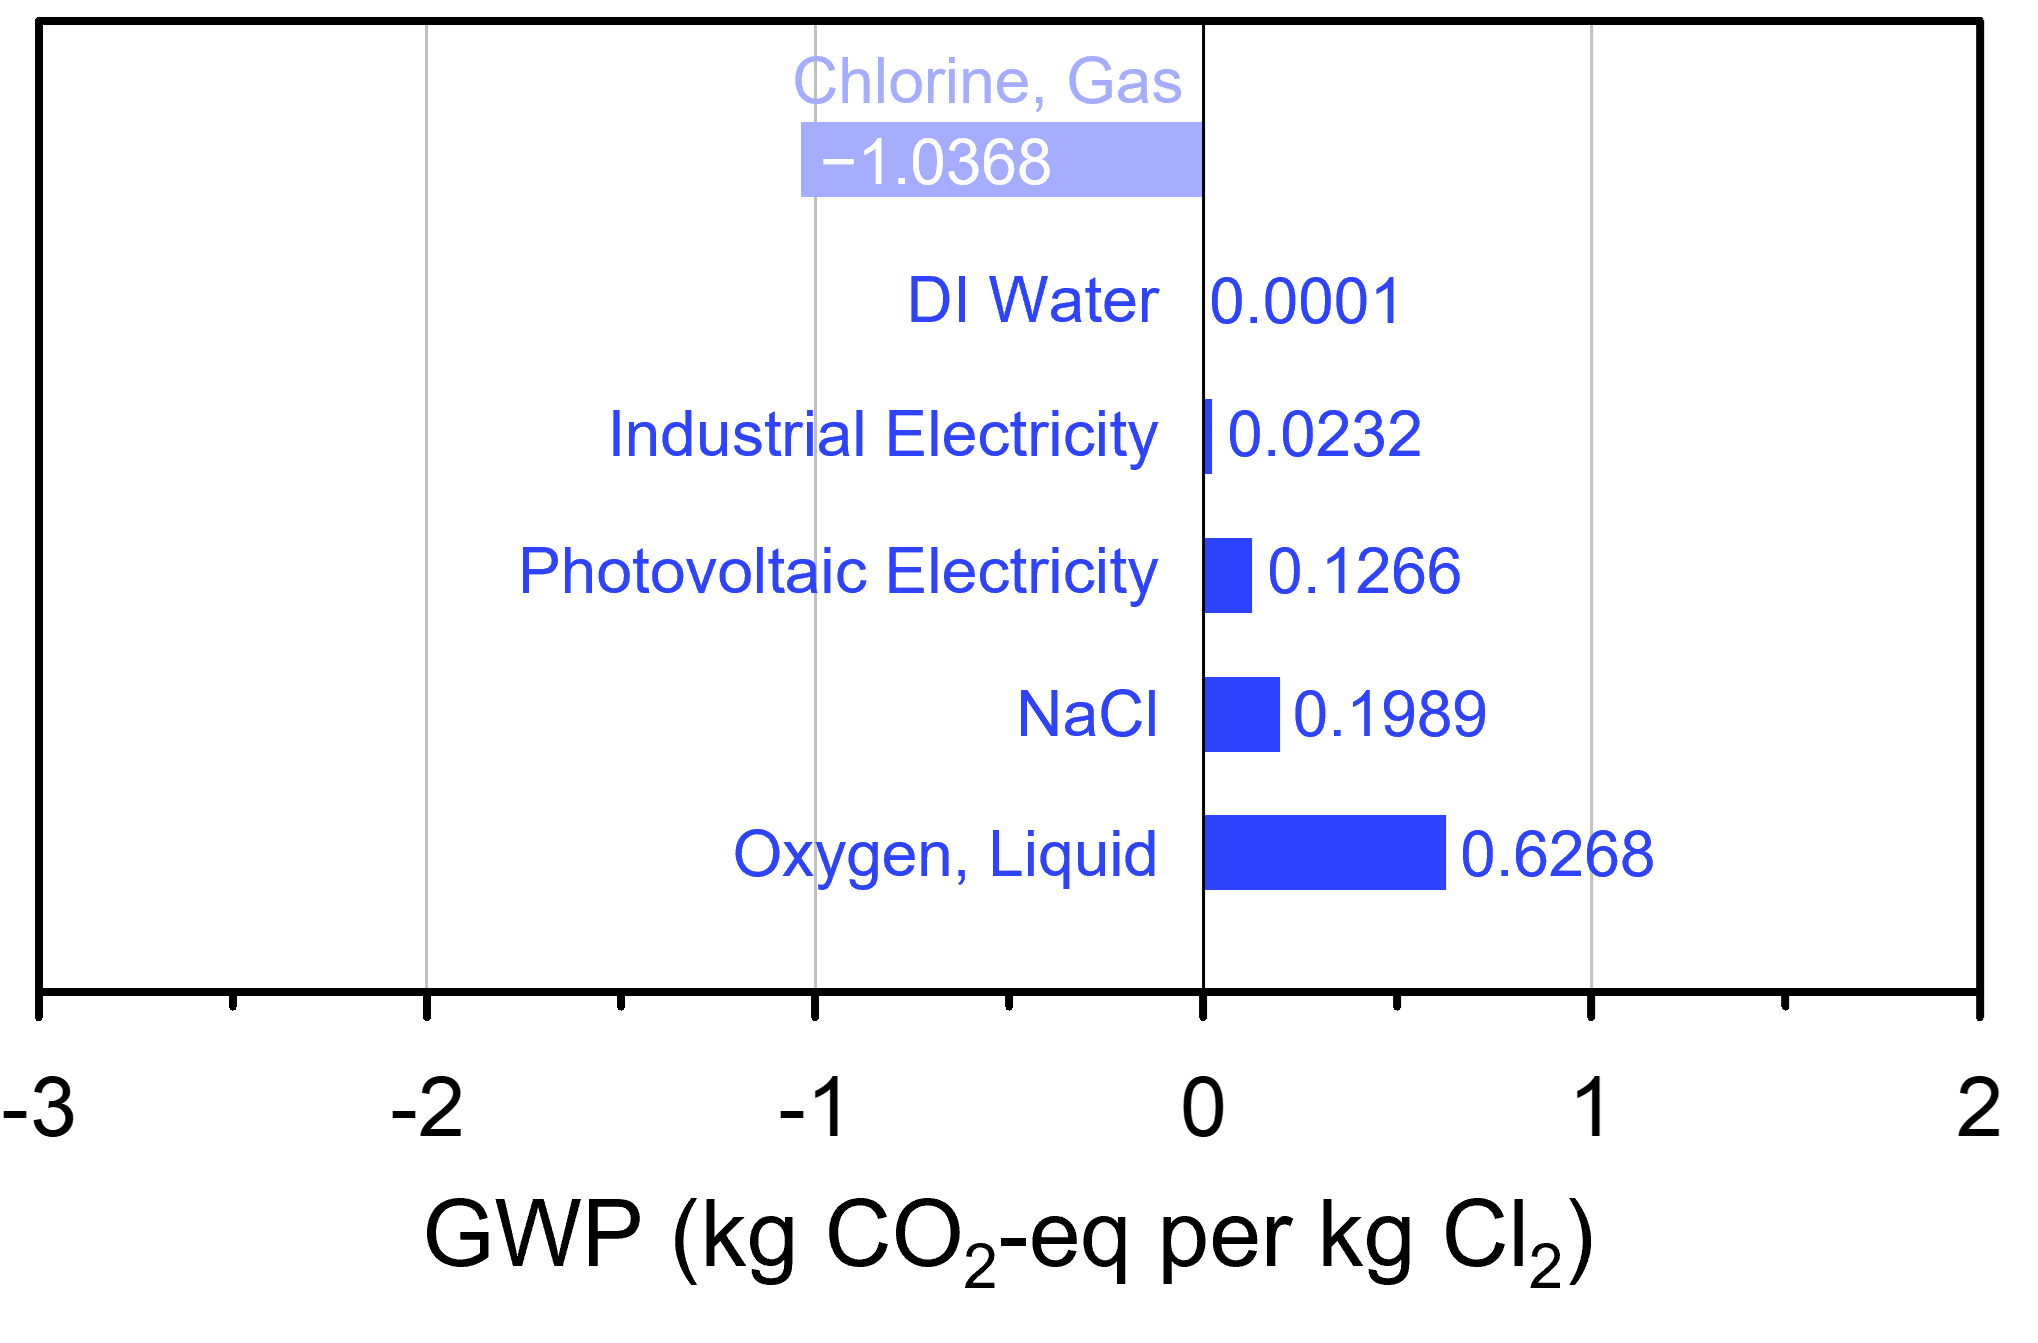


**Supplementary Fig. 31** | Breakdown of the life-cycle GWP of the Cl2 production of the PV-SAEC system.

**Supplementary Tables**

**Supplementary Table 1** | **Textural properties of *X*-Ni SACs**

| **Material** | **BET surface area**  **(m2 g−1)*a*** | **Total pore volume**  **(cm3 g−1)*b*** |
| --- | --- | --- |
| RT-Ni SAC | 747 | 1.55 |
| LT-Ni SAC | 747 | 1.56 |
| IT-Ni SAC | 720 | 1.46 |
| HT-Ni SAC | 715 | 1.57 |

*a*Calculated in the relative pressure range of 0.05–0.2. *b*Calculated at the relative pressure of 0.98–0.99.

**Supplementary Table 2** | **Elemental analysis results of *X*-Ni SACs**

| **Sample** | **Ni (wt %)*a*** | **C (wt %)*b*** | **H (wt %)*b*** | **N (wt %)*b*** | **O (wt %)*b*** |
| --- | --- | --- | --- | --- | --- |
| RT-Ni SAC | 1.73 | 75.81 | 1.88 | 10.39 | 9.54 |
| LT-Ni SAC | 1.85 | 78.86 | 1.05 | 9.42 | 8.31 |
| IT-Ni SAC | 1.74 | 81.73 | 0.46 | 9.11 | 6.68 |
| HT-Ni SAC | 1.58 | 83.11 | 0.22 | 10.06 | 4.65 |

*a*Determined by ICP-OES. *b*Determined by EA.

**Supplementary Table 3** | **Summary of EXAFS fitting parameters for *X*-Ni SACs and Ni foil**

| **Sample** | **Scattering** | **CN*a*** | ***R* (Å)*b*** | ***σ*2 (10−3 Å−2)*c*** | **∆*E*0 (eV)*d*** | ***R* factor (%)** |
| --- | --- | --- | --- | --- | --- | --- |
| RT-Ni SAC | Ni−N1 | 3.9  (0.2) | 1.86  (0.02) | 6.2  (1.7) | 9.1  (2.8) | 1.6 |
| LT-Ni SAC | Ni−N1 | 4.0  (0.5) | 1.87  (0.03) | 8.1  (3.3) | 8.8  (3.1) | 0.8 |
| IT-Ni SAC | Ni−N1 | 3.9  (0.3) | 1.86  (0.02) | 7.4  (2.7) | 11.1  (1.3) | 1.1 |
| HT-Ni SAC | Ni−N1 | 3.9  (0.4) | 1.85  (0.04) | 7.8  (1.1) | 10.1  (2.1) | 1.5 |
| Ni Foil | Ni1−Ni1 | 12* | 2.492  (0.01) | 9.2  (0.5) | 6.8  (1.2) | 0.3 |
|  | Ni1−Ni2 | 6* | 3.524  (0.01) |  |  |  |
|  | Ni1−Ni3 | 24* | 4.317  (0.02) |  |  |  |
|  | Ni1−Ni1−Ni1 | 48* | 3.739  (0.02) |  |  |  |
|  | Ni1−Ni1−Ni2 | 48* | 4.255  (0.02) |  |  |  |

*a*Coordination number. *b*Interatomic distance. *c*Debye–Waller factor. *d*Energy shift. *Denotes the fixed theoretical value of CN obtained from the *fcc* Ni to obtain the passive electron reduction factor which was determined to be 0.86.

**Supplementary Table 4** | **Benchmark of the electrochemical H2O2 performance of *X*-Ni SACs compared with reported SACs and carbon-based catalysts under alkaline conditions**

| **Material** | **Mass Activity**  **@ 0.80 V (A g−1)** | ***X*H2O2 @ -1 mA cm−2 by RRDE (%)** | **References** |
| --- | --- | --- | --- |
| **RT-Ni SAC** | **7.7** | **91** | **This work** |
| **LT-Ni SAC** | **8.9** | **94** | **This work** |
| **IT-Ni SAC** | **13.7** | **93** | **This work** |
| **HT-Ni SAC** | **23.7** | **89** | **This work** |
| Fe-CNT | 0.5 | 79 | Supplementary Ref. 9 |
| O–C(Al) | 11.9 | 84 | Supplementary Ref. 10 |
| Co1–NG(O) | 13.1 | 76 | Supplementary Ref. 11 |
| Mo1/OSG-H | 0.5 | 95 | Supplementary Ref. 12 |
| *meso*-Ni–N/C | 2.9 | 79 | Supplementary Ref. 13 |
| CSH-600 | 0.2 | 83 | Supplementary Ref. 14 |
| NbN3-(O)C3N4/OCNT | 1.4 | 95 | Supplementary Ref. 15 |
| Ni-TCPP(Co) | 1.3 | 97 | Supplementary Ref. 16 |
| Ni-NOC | 0.3 | 89 | Supplementary Ref. 17 |
| VOPc@GCNT-OH | 0.2 | 90 | Supplementary Ref. 18 |
| Co–N5/NC | 10.8 | 89 | Supplementary Ref. 19 |
| 3% Ni–N4–O | 4.6 | 95 | Supplementary Ref. 20 |
| O-CNT | 0.6 | 90 | Supplementary Ref. 21 |
| GOMC | 1.1 | 93 | Supplementary Ref. 22 |
| OCB-120+CTAB | 1.9 | 89 | Supplementary Ref. 23 |
| O-GOMC-5.5 | 2.8 | 92 | Supplementary Ref. 24 |
| H-CB+0.5 M KCl | 6.9 | 87 | Supplementary Ref. 25 |
| OCNS900 | 5.5 | 100 | Supplementary Ref. 26 |
| PCC-900 | 5.3 | 95 | Supplementary Ref. 27 |
| MHCS0.5 | 10.2 | 97 | Supplementary Ref. 28 |
| Bn-C | 8.1 | 96 | Supplementary Ref. 29 |

**Supplementary Table 5** | **Market prices of key feedstocks and products assumed for cost estimations**

| **Material** | **Amount** | **Unit** | **References** |
| --- | --- | --- | --- |
| Oxygen | 40 | $ ton−1 | Supplementary Ref. 6 |
| NaCl | 60 | $ ton−1 | Supplementary Ref. 7 |
| H2O | 0.22 | $ ton−1 | Supplementary Ref. 30 |
| Propylene | 1,120 | $ ton−1 | Supplementary Ref. 1 |
| Industrial electricity | 0.1 | $ kWh−1 | KEPCO |
| Liquefied chlorine | 500 | $ ton−1 | World Bank WITS Trade Data |
| H2O2 | 1.0−1.2 | $ kg−1 | Supplementary Ref. 6,31 |
| Propylene oxide | 2,000 | $ ton−1 | Supplementary Ref. 1 |

**Supplementary Table 6** | **Parameters used to determine the required number of PV-SAEC modules**

| **Parameter** | **Amount** | | | | **Unit** |
| --- | --- | --- | --- | --- | --- |
| Solar irradiance | 6.19 | | | | kWh m−2 d−1 |
| Stream factor*a* | 0.2579 | | | | – |
| Area for one module | 2 | | | | m2 |
| H2O2 production capacity | 100,000 | | | | kg H2O2 d−1 |
| Faradaic efficiency | 70 | 84.3 | 90 | 100 | % |
| H2O2 production rate | 1.3110−4 | 1.5710−4 | 1.6810−4 | 1.8710−4 | mol h−1 cm−2 |
| Number of modules | 181,849 | 151,002 | 141,439 | 127,295 | Qty |

*a*Operation time was assumed to be 6.19 h per day.

**Supplementary Table 7** | **Summary of CAPEX and OPEX parameters for the integrated electrochemical H2O2 production system**

| **Parameter** | **Item** | | **Base Cost** | **Unit** | **Lifetime (y)** | **Scaling Factor** | **Reference** |
| --- | --- | --- | --- | --- | --- | --- | --- |
| CAPEX | PV System | PV module*a* | 70 | $ m−2 | 20 | 1 | Supplementary Ref. 31 |
| Land cost | 0.15 | $ m−2 | – | Supplementary Ref. 32 |
| Electrolyzer stack*b* | Catalyst & AEM*c* | 185 | $ m−2 | 5 | 0.6 | Supplementary Ref. 33,34 |
| NASICON | 0.1 | $ cm−2 |
| Chlorine separation | Chlorine separation*d* | 5,212,080 | $ y−1 | 30 | 0.3 | Supplementary Ref. 35 |
| Others*e* | Balance of plant (BoP) | 15,730,390 | $ y−1 | – | – | Supplementary Ref. 36 |
| Installation | 3,146,078 | $ y−1 | – | – |
| OPEX | Operation & management cost (O&M)*f* | | 3,146,078 | $ y−1 | N/A  (Not Available) | | Supplementary Ref. 37 |
| Chlorine treatment | | 337,679 | $ y−1 | Supplementary Ref. 38 |
| Input chemicals*g* | Oxygen | 1,806,315 | $ y−1 | N/A  (Not Available) | | – |
| NaCl | 7,422,261 | $ y−1 | – |
| H2O | 4,195 | $ y−1 | – |

*a*BOS of the PV system is included in the unit price. *b*The total electrolyzer cost is calculated using the CCM cost fractions from the report. *c*The catalyst costs are estimated by the metal loadings and market price of the constituent metals. *d*The value is converted using the 2023 exchange rate. *e*BoP is 50% of the capital cost and installation cost is 10% of the capital cost. *f*O&M cost is 10% of the capital cost. *g*Chemical amounts are calculated from the measured FE and cell voltage assuming 100% conversion, with 75% of the O2 recovered from the cathode.**Supplementary Table 8** | **Comparison of environmental impact indicator results between the PV-SAEC and the anthraquinone process**

| **System** | **GWP*a*** | **AP*b*** | **FETP*c*** | **METP*c*** | **ADP-Fossil*d*** | **HTP*c*** |
| --- | --- | --- | --- | --- | --- | --- |
| This work  (PV-SAEC) | −0.17 | 0.0001 | 0.78 | 839.92 | −2.29 | 1.14 |
| Anthraquinone process | 2.16 | 0.0055 | 1.06 | 1908.31 | 27.67 | 1.36 |

*a–d*All values are expressed per kg H2O2 produced: *a*kg CO2-eq; *b*kg SO2-eq; *c*kg 1,4-DB-eq; and *d*MJ.**Supplementary Table 9** | **Comparison of environmental impact indicator results between the PV-SAEC and the chlor–alkali process**

| **System** | **GWP*a*** | **AP*b*** | **FETP*c*** | **METP*c*** | **ADP-Fossil*d*** | **HTP*c*** |
| --- | --- | --- | --- | --- | --- | --- |
| This work  (PV-SAEC) | −0.06 | 0.0021 | 0.69 | 1379.53 | −2.48 | 1.16 |
| Chlor–alkali  Process | 1.06 | 0.0047 | 0.82 | 1892.04 | 11.90 | 1.26 |

*a–d*All values are expressed per kg Cl2 produced: *a*kg CO2-eq; *b*kg SO2-eq; *c*kg 1,4-DB-eq; and *d*MJ.

**Supplementary References**

1. Kim, K. H. *et al.* Self-driven propylene epoxidation on modified titanium silicalite-1 by in situ generated hydrogen peroxide. *Nat. Commun.* **16**, 8636 (2025).
2. Qi, J. *et al.* Energy-saving and product-oriented hydrogen peroxide electrosynthesis enabled by electrochemistry pairing and product engineering. *Nat. Commun.* **14**, 6263 (2023).
3. Nie, J. *et al.* Accelerating water dissociation to achieve ampere-level hydrogen peroxide electrosynthesis in brine and seawater. *Nat. Commun.* **16**, 5895 (2025).
4. El-Shazly, A. H. & Fahmy, Y. A.Cost-effective and durable ceramic membrane: fabrication and performance optimization. *Membranes* **15**, 307 (2025).
5. Li, Z. *et al.* Air-breathin aqueous sulfur flow battery for ultralow-cost long-duration electrical storage. *Joule* **1**, 306−327 (2017).
6. Lee, B.-H. *et al.* Supramolecular tuning of supported metal phthalocyanine catalysts for hydrogen peroxide electrosynthesis. *Nat. Catal.* **6**, 234−243 (2023).
7. Ojo, O. E. & Oludolapo, O. A. Cost-benefit and market viability analysis of metals and salts recovery from SWRO brine compared with terrestrial mining and traditional chemical production methods. *Water* **17**, 2855 (2025).
8. Voutchkov, N. Energy use for membrane seawater desalination–current status and trends. *Desalination* **431**, 2−14 (2018).
9. Jiang, K. *et al.* Highly selective oxygen reduction to hydrogen peroxide on transition metal single atom coordination. *Nat. Commun.* **10**, 3997 (2019).
10. Yang, Q. *et al.* Atomically dispersed Lewis acid sites boost 2-electron oxygen reduction activity of carbon-based catalysts. *Nat. Commun.* **11**, 5478 (2020).
11. Jung, E. *et al.* Atomic-level tuning of Co–N–C catalyst for high-performance electrochemical H2O2 production. *Nat. Mater.* **19**, 436−442 (2020).
12. Tang, C. T. *et al.* Coordination tunes selectivity: two-electron oxygen reduction on high-loading molybdenum single-atom catalysts. *Angew. Chem. Int. Ed.* **59**, 9171−9176 (2020).
13. Lim, J. S., Kim, J., Lee, K.-S., Sa, Y. J., Joo, S. H. Impact of catalyst loading of atomically dispersed transition metal catalysts on H2O2 electrosynthesis selectivity. *Electrochim. Acta* **444**, 142031 (2023).
14. Wei, G. *et al.* Single-atom zinc sites with synergetic multiple coordination shells for electrochemical H2O2 production. *Angew. Chem. Int. Ed.* **62**, e202313914 (2023).
15. Li, D. *et al.* External-shell oxygen enabling the local environment modulation of unsaturated NbN3 for efficient electrosynthesis of hydrogen peroxide. *ACS Appl. Mater. Interfaces* **15**, 10718−10725 (2023).
16. Li, Z. *et al.* A computation-guided design of highly defined and dense bimetallic active sites on a two-dimensional conductive metal–organic framework for dfficient H2O2 electrosynthesis. *Angew. Chem. Int. Ed.* **63**, e202408500 (2024).
17. Wang, J. *et al.* Simulation-guided atomic Ni catalyst with oxygen-enriched coordination environment for H2O2 electrosynthesis coupled with 5-HMF-oxidation. *Chem. Catal.* **4**, 101090 (2024).
18. Yang, H. *et al.* Scalable H2O2 production via O2 reduction using immobilized banadyl phthalocyanine. *Angew. Chem. Int. Ed.* **64**, e202509079 (2025).
19. Yu, K. *et al.* Engineering a symmetric electronic structure of Co–N–C single-atom sites toward excellent electrochemical H2O2 production and biomass upgrading. *Angew. Chem. Int. Ed.* **64**, e202502383 (2025).
20. Liu, Z. *et al.* A Ni single-atom catalyst for advanced environmental disinfection based on electrochemical production of hydrogen peroxdie. *J. Mater. Chem. A* **13**, 10683−10693 (2025).
21. Lu, Z. *et al.* High-efficiency oxygen reduction to hydrogen peroxide catalysed by oxidized carbon materials. *Nat. Catal.* **1**, 156−162 (2018).
22. Sa, Y. J., Kim, J. H. & Joo, S. H. Active edge-site-rich carbon nanocatalysts with enhanced electron transfer for efficient electrochemical hydrogen peroxide production. *Angew. Chem. Int. Ed.* **58**, 1100−1105 (2019).
23. Wu, K.-H. *et al.* Highly selective hydrogen peroxide electrosynthesis on carbon: in situ interface engineering with surfactants. *Chem* **6**, 1443−1458 (2020).
24. Lim, J. S. *et al.* Designing highly active nanoporous carbon H2O2 production electrocatalysts through active site identification. *Chem* **7**, 3114−3130 (2021).
25. Lee, J. *et al.* Unveiling the cationic promotion effect of H2O2 electrosynthesis activity of O-doped carbons. *ACS Appl. Mater. Interfaces.* **13**, 59904−59914 (2021).
26. Chen, S. *et al.* Chemical identification of catalytically active sites on oxygen-doped carbon nanosheet to decipher the high activity for electro-synthesis hydrogen peroxide. *Angew. Chem. Int. Ed.* **60**, 16607−16614 (2021).
27. Liu, L. *et al.* Spectroscopic identification of active sites of oxygen-doped carbon for selective oxygen reduction to hydrogen peroxide. *Angew. Chem. Int. Ed.* **62**, e202303525 (2023).
28. Tian, Q. *et al.* Mesoporous carbon spheres with programmable interiors as efficient nanoreactors for H2O2 electrosynthesis. *Nat. Commun.* **15**, 983 (2024).
29. Wu, Y. *et al.* Electrochemically synthesized H2O2 at industrial-level current densities enabled by in situ fabricated few-layer boron nanosheets. *Nat. Commun.* **15**, 10843 (2024).
30. Liu, W.-J. *et al.* Efficient electrochemical production of glucaric acid and H2 via glucose electrolysis. *Nat. Commun.* **11**, 265 (2020).
31. Wenderich, K. *et al.* Industrial feasibility of anodic hydrogen peroxide production through photoelectrochemical water splitting: a techno-economic analysis. *Sustainable Energy Fuels* **4**, 3143−3156 (2020).
32. Grimm, A., de Jong, W. A. & Kramer, G. J. Renewable hydrogen production: a techno-economic comparison of photoelectrochemical cells and photovoltaic-electrolysis. *Int. J. Hydrogen Energy* **45**, 22545−22555 (2020).
33. Mayyas, A., Ruth, M., Pivovar, B., Bender, G. & Wipke, K. *Manufacturing cost analysis for proton exchange membrane water electrolyzers.* (NREL/TP-6A20-72740), National Renewable Energy Laboratory (2018).
34. Shin, H., Hansen, K. U. & Jiao, F. Techno-economic assessment of low-temperature carbon dioxide electrolysis. *Nat. Sustain.* **4**, 911−919 (2021).
35. Klaucke, F. *et al.* Chloro-alkali process with subsequent polyvinyl chloride production─cost analysis and economic evaluation of demand response. *Ind. Eng. Chem. Res.* **62**, 7336−7351 (2023).
36. Lee, B.-H. *et al.* Supramolecular tuning of supported metal phthalocyanine catalysts for hydrogen peroxide electrosynthesis. *Nat. Catal.* **6**, 234−243 (2023).
37. Wang, X. *et al.* Efficient electrosynthesis of N-propanol from carbon monoxide using a Ag–Ru–Cu catalyst. *Nat. Energy* **7**, 170−176 (2022).
38. Kermeli, K. & Worrel, E. *Energy efficiency and cost-saving opportunities for the chlor-alkali industry: an ENERGY STAR® guide for energy and plant managers.* (EPA/430-R-24-008) U.S. Environmental Protection Agency (2025).
